# Supplementary material for: Tertiary cyclopropyl carbagermatranes: synthesis and cross-coupling
Source: Royal Society of Chemistry journal article supplement (doi:10.1039/d1cc02930d), 2021-01-01

# Tertiary Cyclopropyl Carbagermatranes: Synthesis and Cross-Coupling

Shuo Yang, Wei-Tao Jiang and Bin Xiao\*

*Department of Chemistry, University of Science and Technology of China, Hefei  
230026, China*

## Supporting Information

### List of Contents

|                                                                                                                |    |
|----------------------------------------------------------------------------------------------------------------|----|
| 1. General Information.....                                                                                    | 1  |
| 1.1 Reagent information.....                                                                                   | 1  |
| 1.2 Analytical information .....                                                                               | 1  |
| 2. Experimental Procedure and Compound Characterization Data for Scheme 2 .....                                | 1  |
| 2.1 Activation of Zn powder .....                                                                              | 1  |
| 2.2 Table 1. Condition optimization of decarboxylative carbagermatranation <sup>a</sup> .....                  | 1  |
| 2.3 Preparation of $\alpha$ -arylcyclopropane carboxylic acid NHP esters and<br>characterization .....         | 2  |
| 2.4 Procedure for decarboxylative carbagermatranation and characterization .....                               | 8  |
| 3. Experimental Procedure of Cross-Coupling Reactions and Compound<br>Characterization Data for Scheme 3 ..... | 15 |
| 3.1 Table 2-3. Condition optimization of cross-coupling reactions .....                                        | 15 |
| 3.2 Preparation and characterization data of cross-coupling product .....                                      | 16 |
| 4. Mechanism Experiment .....                                                                                  | 20 |
| 4.1 Scheme 4. TEMPO captures experiment .....                                                                  | 20 |
| 4.2 Radical probe experiments .....                                                                            | 22 |
| 4.3 Deuterium labeling studies .....                                                                           | 23 |
| 5. Stereospecific Cross-Coupling Reaction and Orthogonality Demonstration .....                                | 25 |
| 5.1 Scheme 5. Stereospecific cross-coupling reaction .....                                                     | 25 |
| 5.2 Scheme 6. Orthogonal reactivity with boron reagents .....                                                  | 27 |
| 5.3 Competitive experiment with boron reagent .....                                                            | 30 |
| 6. Reference .....                                                                                             | 32 |
| 7. X-Ray Crystallographic Data and NMR Spectra .....                                                           | 33 |
| 7.1 X-ray crystallographic data of 2t and 3k .....                                                             | 33 |
| 7.2 NMR spectra .....                                                                                          | 48 |

---

## 1. General Information

### 1.1 Reagent information

All of the reagents were purchased from commercial source and used without further purification unless otherwise noted. THF was freshly distilled before used. DMAc, CH<sub>3</sub>CN and dioxane were purchased from J&K. Zn powder was activated before used. Silica gel (300- 400 mesh, pH = 6-7, HG/T2354-2010) was purchased from Branch Qingdao Haiyang Chemical Co., Ltd. Reagents and solvents were used as received unless otherwise noted.

### 1.2 Analytical information

<sup>1</sup>H-NMR spectra were recorded on 400 MHz spectrometers. Chemical shifts of <sup>1</sup>H-NMR spectra were reported in parts per million relative to tetramethylsilane ( $\delta = 0$ ). Data for <sup>1</sup>H-NMR were reported as follows: chemical shift ( $\delta$  ppm), multiplicity, coupling constant (Hz), and integration. <sup>13</sup>C-NMR spectra were recorded on 101 MHz spectrometers. Chemical shifts were reported in parts per million relative to the solvent resonance as the internal standard (CDCl<sub>3</sub>,  $\delta$  77.2 ppm; C<sub>6</sub>D<sub>6</sub>,  $\delta$  128.1 ppm). Data for <sup>13</sup>C-NMR are reported in terms of chemical shift ( $\delta$  ppm), multiplicity, and coupling constant (Hz). High-resolution mass spectra (HRMS) were recorded on an Acquity UPLC-Xevo G2 QToF instrument with ESI mode unless otherwise stated. Gas chromatographic (GC) analysis was acquired on a Shimadzu GC-2014 Series GC system equipped with a flame-ionization detector. Organic solutions were concentrated under reduced pressure on a Buchi rotary evaporator. Chromatographic purification of products was accomplished using column chromatography or preparative TLC (Thin-layer chromatogram) on silica gel.

## 2. Experimental Procedure and Compound Characterization Data for Scheme 2

### 2.1 Activation of Zn powder

To a 100 mL round-bottom flask was charged with 10 g Zn powder followed by the addition of 20 mL HCl (5% aq), stirred at room temperature for 2 hours, then filtered and washed with H<sub>2</sub>O, ethanol and ethyl ether three times respectively, then dried under vacuum at 120 °C for 2 hours and stored under argon atmosphere.

### 2.2 Table 1. Condition optimization of decarboxylative carbagermatration<sup>a</sup>

To an oven-dried screw-cap tube equipped with stir bar was charged with **Ge**-Br<sup>1</sup> (0.1 mmol, 29.2 mg, 1.0 equiv.),  $\alpha$ -(4-methoxy)phenylcyclopropane carboxylic acid NHP ester (**1a**) (0.2 mmol, 67.5 mg, 2.0 equiv.) and Zn powder. The tube was vacuumed and

backfilled with argon for three cycles. Solvent was added through syringe and the tube was sealed with a teflon stopper and stirred at indicated temperature for indicated time. The reaction was quenched with  $\text{NH}_4\text{Cl}$  (sat, aq), extracted with ethyl acetate. Organic layer was separated, dried over  $\text{Na}_2\text{SO}_4$  and concentrated under reduced pressure. Mesitylene (0.1 mmol) was added as internal standard for NMR analysis.

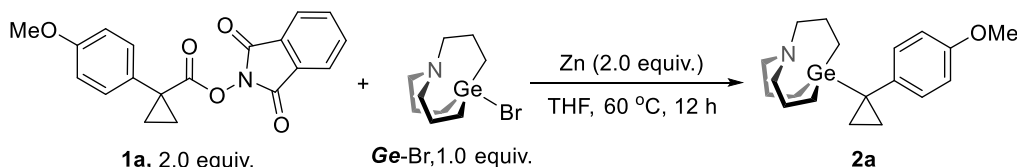

| Entry | Change of standard conditions         | Yield/% <sup>c</sup> |
|-------|---------------------------------------|----------------------|
| 1     | None                                  | 98 <sup>b</sup>      |
| 2     | $\text{CH}_3\text{CN}$ instead of THF | 70                   |
| 3     | Dioxane instead of THF                | 24                   |
| 4     | Toluene instead of THF                | <5                   |
| 5     | DMAc instead of THF                   | 37                   |
| 6     | DMAc/THF(v/v) = 1/1 instead of THF    | 41                   |
| 7     | 1.0 equiv. of Zn dust was used        | 39                   |
| 8     | 3.0 equiv. of Zn dust was used        | 94                   |
| 9     | 1.0 equiv. of NHP ester was used      | 47                   |
| 10    | RT instead of 60 °C                   | 71                   |

<sup>a</sup>All reactions were performed on 0.1 mmol scale, solvent (0.2 M). <sup>b</sup>Yield were determined by  $^1\text{H-NMR}$  using mesitylene as internal standard. <sup>c</sup>Isolated yield.

### 2.3 Preparation of $\alpha$ -arylcyclopropane carboxylic acid NHP esters and characterization

**1a, 1d, 1g and 1m** were synthesized according reported literatures.<sup>2-4</sup> **1b, 1c, 1e, 1f, 1h, 1i and 1n-1r** were synthesized as follow:

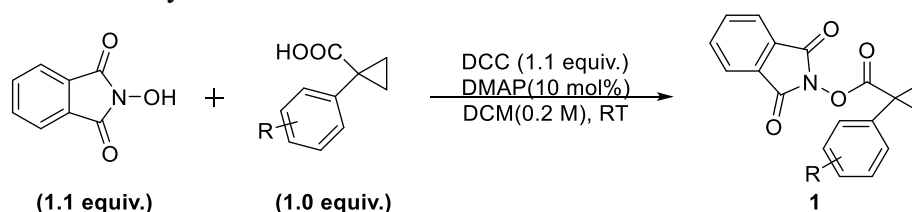

**General procedure A for the preparation of  $\alpha$ -arylcyclopropane carboxylic acid NHP esters:** To a solution of NHPI (N-Hydroxyphthalimide, 1.1 equiv.),  $\alpha$ -arylcyclopropane carboxylic acid (1.0 equiv.) and DMAP (4-Dimethylaminopyridine, 10 mol%) in DCM (0.2 M) was added DCC (Dicyclohexylcarbodiimide, 1.1 equiv.). The resulting mixture was stirred at room temperature and monitored by TLC technique. After the alkyl carboxylic acid was consumed, the mixture was filtered through a pad of silica gel and rinsed with additional  $\text{CH}_2\text{Cl}_2$ , filtrate was collected and concentrated under reduced pressure. Further purification can be accomplished by silica gel column chromatography or recrystallization as needed.

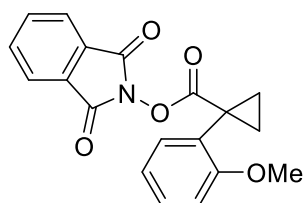

**1,3-dioxoisindolin-2-yl 1-(2-methoxyphenyl)cyclopropane-1-carboxylate (1b).** 5 mmol 1-(2-methoxyphenyl)cyclopropane-1-carboxylic acid<sup>5</sup> was applied in the general procedure A. Purified by recrystallization from DCM/MeOH to give title compound as white solid in 80% yield.

**<sup>1</sup>H NMR (400 MHz, CDCl<sub>3</sub>)** δ 7.85 – 7.79 (m, 2H), 7.76 – 7.70 (m, 1H), 7.32 (m, 2H), 6.97 – 6.90 (m, 2H), 3.97 (s, 3H), 1.85 (q, *J* = 4.4 Hz, 2H), 1.38 (q, *J* = 4.4 Hz, 2H).

**<sup>13</sup>C NMR (101 MHz, CDCl<sub>3</sub>)** δ 171.29, 161.95, 159.42, 134.67, 130.02, 129.47, 129.05, 125.69, 123.82, 120.19, 110.51, 55.77, 23.38, 18.23. **HRMS (ESI):** Exact mass calculated for C<sub>19</sub>H<sub>15</sub>NO<sub>5</sub> [M+H]<sup>+</sup> 338.1028, found 338.10217.

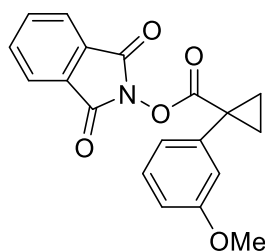

**1,3-dioxoisindolin-2-yl 1-(3-methoxyphenyl)cyclopropane-1-carboxylate (1c).** 5 mmol 1-(3-methoxyphenyl)cyclopropane-1-carboxylic acid was applied in the general procedure A. Purified by recrystallization from DCM/MeOH to give title compound as white solid in 87% yield.

**<sup>1</sup>H NMR (400 MHz, CDCl<sub>3</sub>)** δ 7.88 – 7.81 (m, 2H), 7.79 – 7.71 (m, 2H), 7.28 – 7.24 (m, 1H), 7.08 (m, 2H), 6.85 (m, 1H), 3.83 (s, 3H), 1.89 (q, *J* = 4.3 Hz, 2H), 1.49 (q, *J* = 4.3 Hz, 2H). **<sup>13</sup>C NMR (101 MHz, CDCl<sub>3</sub>)** δ 171.12, 161.98, 159.57, 138.49, 134.79, 129.54, 129.02, 123.97, 122.78, 116.18, 113.80, 55.39, 27.45, 18.87. **HRMS (ESI):** Exact mass calculated for C<sub>19</sub>H<sub>15</sub>NO<sub>5</sub> [M+H]<sup>+</sup> 338.1028, found 338.10237.

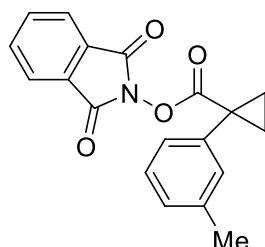

**1,3-dioxoisindolin-2-yl 1-(m-tolyl)cyclopropane-1-carboxylate (1e).** 5 mmol 1-(3-tolyl)cyclopropane-1-carboxylic acid<sup>6</sup> was applied in the general procedure A. Purified by recrystallization from DCM/MeOH to give title compound as white solid in 85% yield.

**<sup>1</sup>H NMR (400 MHz, CDCl<sub>3</sub>)** δ 7.87 – 7.81 (m, 2H), 7.77 – 7.71 (m, 2H), 7.35 – 7.30 (m, 2H), 7.28 – 7.22 (m, 1H), 7.12 (d, *J* = 7.4 Hz, 1H), 2.36 (s, 3H), 1.89 (q, *J* = 4.2 Hz, 2H), 1.48 (q, *J* = 4.3 Hz, 2H). **<sup>13</sup>C NMR (101 MHz, CDCl<sub>3</sub>)** δ 171.28, 162.00, 138.20, 136.95, 134.77, 131.39, 129.01, 128.84, 128.45, 127.74, 123.95, 27.32, 21.47, 18.80. **HRMS (ESI):** Exact mass calculated for C<sub>19</sub>H<sub>15</sub>NO<sub>4</sub> [M+H]<sup>+</sup> 322.1079, found 322.10719.

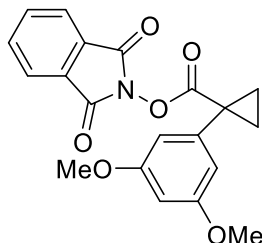

**1,3-dioxoisindolin-2-yl 1-(3,5-dimethoxyphenyl)cyclopropane-1-carboxylate (1f).** 5 mmol 1-(3,5-dimethoxyphenyl)cyclopropane-1-carboxylic acid<sup>7</sup> was applied in the general procedure A. Purified by silica gel column chromatography using petroleum ether/ethyl acetate = 3/1 as eluent to give title compound as light yellow solid in 92% yield.

**<sup>1</sup>H NMR (400 MHz, CDCl<sub>3</sub>)** δ 7.89 – 7.81 (m, 2H), 7.80 – 7.71 (m, 2H), 6.67 (d, *J* = 2.1 Hz, 2H), 6.40 (m, 1H), 3.81 (s, 6H), 1.93 – 1.82 (q, *J* = 4.3 Hz, 2H), 1.48 (q, *J* = 4.3 Hz, 2H). **<sup>13</sup>C NMR (101 MHz, CDCl<sub>3</sub>)** δ 171.03, 161.95, 160.69, 139.15, 134.78, 129.01, 123.95, 108.49, 100.27, 55.49, 27.64, 18.85. **HRMS (ESI):** Exact mass calculated for C<sub>20</sub>H<sub>17</sub>NO<sub>6</sub> [M+H]<sup>+</sup> 368.1134, found 368.1128.

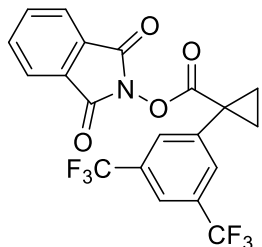

**1,3-dioxoisindolin-2-yl 1-(3,5-bis(trifluoromethyl)phenyl)cyclopropane-1-carboxylate (1h).** 5 mmol 1-(3,5-bis(trifluoromethyl)phenyl)cyclopropane-1-carboxylic acid<sup>7</sup> was applied in the general procedure A. Purified by silica gel column chromatography using petroleum ether/ethyl acetate = 4/1 as eluent to give title compound as white solid in 61% yield.

**<sup>1</sup>H NMR (400 MHz, CDCl<sub>3</sub>)** δ 7.99 (s, 2H), 7.88 (m, *J* = 5.5, 3.1 Hz, 2H), 7.84 (s, 1H), 7.79 (m, 2H), 2.07 (q, *J* = 4.6 Hz, 2H), 1.58 (q, *J* = 4.7 Hz, 2H). **<sup>13</sup>C NMR (101 MHz, CDCl<sub>3</sub>)** δ 169.83, 161.81, 139.62, 135.00, 132.04 (q, *J*<sub>CF</sub> = 33.5 Hz), 130.94 (d, *J*<sub>CF</sub> = 2.7 Hz), 128.91, 127.28, 124.16, 123.21 (d, *J*<sub>CF</sub> = 273.7 Hz), 122.27 (d, *J*<sub>CF</sub> = 3.8 Hz), 121.85, 119.14, 27.12, 18.85. **<sup>19</sup>F NMR (376 MHz, CDCl<sub>3</sub>)** δ -62.78. **HRMS (ESI):** Exact mass calculated for C<sub>20</sub>H<sub>11</sub>F<sub>6</sub>NO<sub>4</sub> [M+H]<sup>+</sup> 444.0671, found 444.06587.

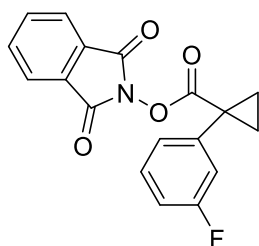

**1,3-dioxoisindolin-2-yl 1-(3-fluorophenyl)cyclopropane-1-carboxylate (1i).** 5 mmol 1-(3-fluorophenyl)cyclopropane-1-carboxylic acid was applied in the general procedure A. Purified by silica gel column chromatography using petroleum ether/ethyl acetate = 5/1 as eluent to give title compound as white solid in 70% yield.

**<sup>1</sup>H NMR (400 MHz, CDCl<sub>3</sub>)** δ 7.87 – 7.82 (m, 2H), 7.78 – 7.72 (m, 2H), 7.34 – 7.29 (m, 2H), 7.22 (m, 1H), 7.03 – 6.97 (m, 1H), 1.92 (q, *J* = 4.4 Hz, 2H), 1.49 (q, *J* = 4.4 Hz, 2H). **<sup>13</sup>C NMR (101 MHz, CDCl<sub>3</sub>)** δ 170.64, 162.6 (d, *J*<sub>CF</sub> = 247.5 Hz), 161.90, 139.35 (d, *J*<sub>CF</sub> = 7.8 Hz), 134.84, 130.05 (d, *J*<sub>CF</sub> = 8.4 Hz), 128.93, 126.36 (d, *J*<sub>CF</sub> = 2.9 Hz), 123.99, 117.66 (d, *J*<sub>CF</sub> = 21.7 Hz), 115.13 (d, *J*<sub>CF</sub> = 20.9 Hz), 27.12, 18.88. **<sup>19</sup>F NMR (376 MHz, CDCl<sub>3</sub>)** δ -112.83. **HRMS (ESI):** Exact mass calculated for C<sub>18</sub>H<sub>12</sub>FNO<sub>4</sub> [M+H]<sup>+</sup> 326.0829, found 326.08219.

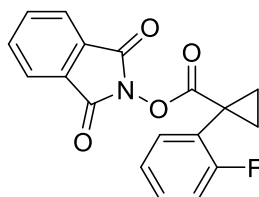

**1,3-dioxoisindolin-2-yl 1-(2-fluorophenyl)cyclopropane-1-carboxylate (1j).** 5 mmol 1-(2-fluorophenyl)cyclopropane-1-carboxylic acid<sup>8</sup> was applied in the general procedure A. Purified by silica gel column chromatography using petroleum ether/ethyl acetate = 5/1 as eluent to give title compound as white solid in 71% yield.

**<sup>1</sup>H NMR (400 MHz, CDCl<sub>3</sub>)** δ 7.87 – 7.81 (m, 2H), 7.78 – 7.72 (m, 2H), 7.42 (m, 1H), 7.32 (m, 1H), 7.16 – 7.07 (m, 2H), 1.96 (q, *J* = 4.5 Hz, 2H), 1.49 (q, *J* = 4.5 Hz, 2H). **<sup>13</sup>C NMR (101 MHz, CDCl<sub>3</sub>)** δ 170.28, 162.62 (d, *J*<sub>CF</sub> = 251.5 Hz), 161.83, 134.79, 131.79 (d, *J*<sub>CF</sub> = 3.1 Hz), 130.15 (d, *J*<sub>CF</sub> = 8.2 Hz), 128.96, 124.52 (d, *J*<sub>CF</sub> = 14.4 Hz), 124.14 (d, *J*<sub>CF</sub> = 3.7 Hz), 123.95, 115.74 (d, *J*<sub>CF</sub> = 21.2 Hz), 22.13, 18.60. **<sup>19</sup>F NMR (376 MHz, CDCl<sub>3</sub>)** δ -113.18. **HRMS (ESI):** Exact mass calculated for C<sub>18</sub>H<sub>12</sub>FNO<sub>4</sub> [M+H]<sup>+</sup> 326.0829, found 326.08219.

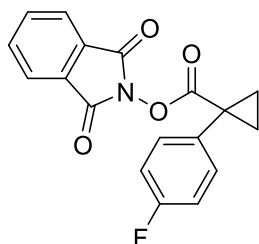

**1,3-dioxoisindolin-2-yl 1-(4-fluorophenyl)cyclopropane-1-carboxylate (1k).** 5

mmol 1-(4-fluorophenyl)cyclopropane-1-carboxylic acid was applied in the general procedure A. Purified by silica gel column chromatography using petroleum ether/ethyl acetate = 5/1 as eluent to give title compound as white solid in 77% yield.

**<sup>1</sup>H NMR (400 MHz, CDCl<sub>3</sub>)** δ 7.88 – 7.82 (m, 2H), 7.79 – 7.73 (m, 2H), 7.52 – 7.46 (m, 2H), 7.08 – 7.01 (m, 2H), 1.91 (q, *J* = 4.3 Hz, 2H), 1.46 (q, *J* = 4.4 Hz, 2H). **<sup>13</sup>C NMR (101 MHz, CDCl<sub>3</sub>)** δ 171.02, 162.42 (d, *J*<sub>CF</sub> = 247.5 Hz), 161.97, 134.84, 132.91 (d, *J*<sub>CF</sub> = 3.3 Hz), 132.45 (d, *J*<sub>CF</sub> = 8.3 Hz), 128.99, 124.02, 115.52 (d, *J*<sub>CF</sub> = 21.6 Hz), 26.71, 18.99. **<sup>19</sup>F NMR (376 MHz, CDCl<sub>3</sub>)** δ -113.82. **HRMS (ESI):** Exact mass calculated for C<sub>18</sub>H<sub>12</sub>FNO<sub>4</sub> [M+H]<sup>+</sup> 326.0829, found 326.08206.

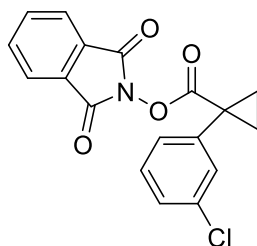

**1,3-dioxoisindolin-2-yl 1-(3-chlorophenyl)cyclopropane-1-carboxylate (1l).** 5 mmol 1-(3-chlorophenyl)cyclopropane-1-carboxylic acid was applied in the general procedure A. Purified by recrystallization from DCM/MeOH to give title compound as white solid in 78% yield.

**<sup>1</sup>H NMR (400 MHz, CDCl<sub>3</sub>)** δ 7.88 – 7.82 (m, 2H), 7.79 – 7.73 (m, 2H), 7.50 (s, 1H), 7.44 – 7.39 (m, 1H), 7.29 (m, 2H), 1.92 (q, *J* = 4.3 Hz, 2H), 1.48 (q, *J* = 4.4 Hz, 2H). **<sup>13</sup>C NMR (101 MHz, CDCl<sub>3</sub>)** δ 170.62, 161.93, 139.02, 134.86, 134.28, 130.77, 129.86, 129.03, 128.37, 124.04, 27.16, 18.82. **HRMS (ESI):** Exact mass calculated for C<sub>18</sub>H<sub>12</sub>ClNO<sub>4</sub> [M+H]<sup>+</sup> 342.0533, found 342.05243.

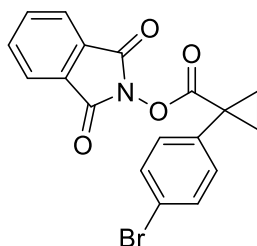

**1,3-dioxoisindolin-2-yl 1-(4-bromophenyl)cyclopropane-1-carboxylate (1n).** 5 mmol 1-(4-bromophenyl)cyclopropane-1-carboxylic acid was applied in the general procedure A. Purified by recrystallization from DCM/MeOH to give title compound as white solid in 62% yield.

**<sup>1</sup>H NMR (400 MHz, CDCl<sub>3</sub>)** δ 7.87 – 7.81 (m, 2H), 7.78 – 7.73 (m, 2H), 7.48 (d, *J* = 8.4 Hz, 2H), 7.39 (d, *J* = 8.4 Hz, 2H), 1.90 (q, *J* = 4.3 Hz, 2H), 1.45 (q, *J* = 4.4 Hz, 2H). **<sup>13</sup>C NMR (101 MHz, CDCl<sub>3</sub>)** δ 170.66, 161.89, 136.07, 134.84, 132.37, 131.72, 128.90, 123.99, 122.16, 26.86, 18.86. **HRMS (ESI):** Exact mass calculated for C<sub>18</sub>H<sub>12</sub>BrNO<sub>4</sub> [M+H]<sup>+</sup> 386.0028, found 386.00168.

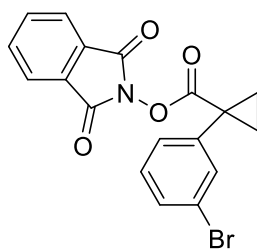

**1,3-dioxoisindolin-2-yl 1-(3-bromophenyl)cyclopropane-1-carboxylate (1o).** 5 mmol 1-(3-bromophenyl)cyclopropane-1-carboxylic acid was applied in the general procedure A. Purified by recrystallization from DCM/MeOH to give title compound as white solid in 63% yield.

**<sup>1</sup>H NMR (400 MHz, CDCl<sub>3</sub>)** δ 7.89 – 7.83 (m, 2H), 7.79 – 7.74 (m, 2H), 7.66 (m, 1H), 7.49 – 7.43 (m, 2H), 7.23 (t, *J* = 9.9, 5.9 Hz, 1H), 1.92 (q, *J* = 4.4 Hz, 2H), 1.49 (q, *J* = 4.4 Hz, 2H). **<sup>13</sup>C NMR (101 MHz, CDCl<sub>3</sub>)** δ 170.62, 161.92, 139.26, 134.87, 133.63, 131.29, 130.14, 129.54, 128.98, 124.05, 122.40, 27.11, 18.85. **HRMS (ESI):** Exact mass calculated for C<sub>18</sub>H<sub>12</sub>BrNO<sub>4</sub> [M+H]<sup>+</sup> 386.0028, found 386.0031.

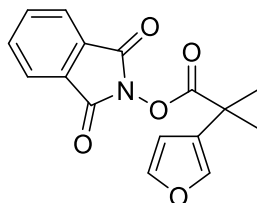

**1,3-dioxoisindolin-2-yl 1-(furan-3-yl)cyclopropane-1-carboxylate (1p).** 5 mmol 1-(furan-3-yl)cyclopropane-1-carboxylic acid was applied in the general procedure A. Purified by recrystallization from DCM/MeOH to give title compound as white solid in 89% yield.

**<sup>1</sup>H NMR (400 MHz, CDCl<sub>3</sub>)** δ 7.90 – 7.84 (m, 2H), 7.80 – 7.74 (m, 2H), 7.52 (s, 1H), 7.37 (t, *J* = 1.7 Hz, 1H), 6.50 (m, 1H), 1.90 (q, *J* = 4.3 Hz, 2H), 1.41 (q, *J* = 4.4 Hz, 2H). **<sup>13</sup>C NMR (101 MHz, CDCl<sub>3</sub>)** δ 170.32, 162.02, 143.08, 141.25, 134.85, 129.04, 124.02, 122.50, 111.19, 19.66, 18.63. **HRMS (ESI):** Exact mass calculated for C<sub>16</sub>H<sub>11</sub>NO<sub>4</sub>S [M+H]<sup>+</sup> 298.0715, found 298.0711.

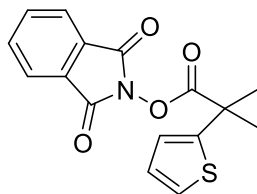

**1,3-dioxoisindolin-2-yl 1-(thiophen-2-yl)cyclopropane-1-carboxylate (1q).** 5mmol 1-(thiophen-2-yl)cyclopropane-1-carboxylic acid was applied in the general procedure A. Purified by recrystallization from DCM/MeOH to give title compound as white solid in 76% yield.

**<sup>1</sup>H NMR (400 MHz, CDCl<sub>3</sub>)** δ 7.88 – 7.82 (m, 2H), 7.79 – 7.73 (m, 2H), 7.28 – 7.22 (m, 1H), 7.15 (dd, *J* = 3.6, 1.1 Hz, 1H), 6.96 (dd, *J* = 5.2, 3.6 Hz, 1H), 2.02 (q, *J* = 4.3 Hz, 2H), 1.61 (q, *J* = 4.4 Hz, 2H). **<sup>13</sup>C NMR (101 MHz, CDCl<sub>3</sub>)** δ 170.17, 161.88,



140.36, 134.84, 128.94, 128.39, 126.72, 125.84, 124.00, 22.01, 21.28. **HRMS (ESI):** Exact mass calculated for  $C_{16}H_{11}NO_4S$   $[M+H]^+$  314.0487, found 314.04783.

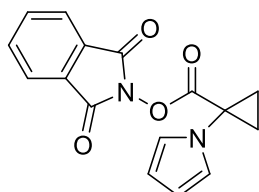

**1,3-dioxoisindolin-2-yl 1-(1H-pyrrol-1-yl)cyclopropane-1-carboxylate (1r).** 5 mmol 1-(1H-pyrrol-1-yl)cyclopropane-1-carboxylic acid was applied in the general procedure A. Purified by silica gel column chromatography using petroleum ether/ethyl acetate = 4/1 as eluent to give title compound as light yellow solid in 84% yield.

**$^1H$  NMR (400 MHz,  $CDCl_3$ )**  $\delta$  7.88 – 7.83 (m, 2H), 7.80 – 7.75 (m, 2H), 6.90 (t,  $J$  = 2.2 Hz, 2H), 6.20 (t,  $J$  = 2.2 Hz, 2H), 2.02 (q,  $J$  = 5.2 Hz, 2H), 1.81 (q,  $J$  = 4.8 Hz, 2H).

**$^{13}C$  NMR (101 MHz,  $CDCl_3$ )**  $\delta$  169.24, 161.62, 134.94, 128.85, 124.09, 122.58, 109.54, 39.35, 19.59. **HRMS (ESI):** Exact mass calculated for  $C_{16}H_{12}N_2O_4$   $[M+H]^+$  297.0875, found 297.08663.

## 2.4 Procedure for decarboxylative carbagermatration and characterization

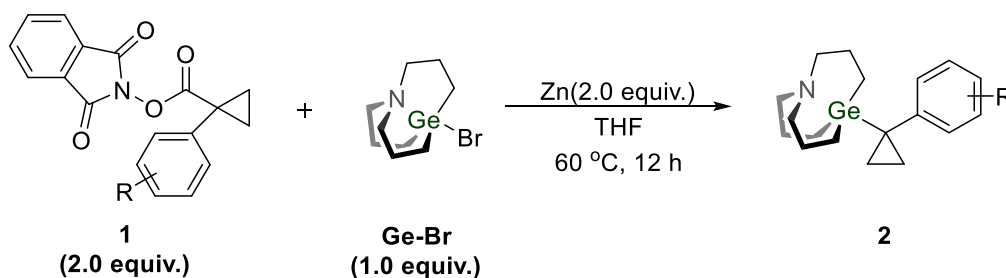

**General procedure B for decarboxylative carbagermatration:** To an oven-dried screw-cap tube equipped with stir bar was charged with **Ge-Br** (0.2 mmol, 58.4 mg, 1.0 equiv.), corresponding NHP ester (0.4 mmol, 2.0 equiv.) and Zn powder (0.4 mmol, 26 mg, 2.0 equiv.). The tube was vacuumed and backfilled with argon for three cycles, then 1.0 mL THF was added through syringe and the tube was sealed with a teflon stopper and stirred at 60 °C for 12 hours. The reaction was quenched with  $NH_4Cl$  (sat, aq), extracted with ethyl acetate. Organic layer was separated, dried over  $Na_2SO_4$ , concentrated under reduced pressure to give crude product, which was purified by silica gel column chromatography.

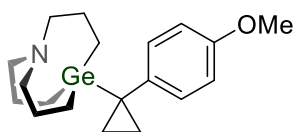

**5-(1-(4-methoxyphenyl)cyclopropyl)-1-aza-5-germabicyclo[3.3.3]undecane (2a).**

Synthesized by general procedure B, purified by silica gel column chromatography using petroleum ether/ethyl acetate = 100/1 as eluent to give title compound as light yellow oil in 98% yield.

**<sup>1</sup>H NMR (400 MHz, C<sub>6</sub>D<sub>6</sub>)** δ 6.98 – 6.92 (m, 2H), 6.57 – 6.51 (m, 2H), 3.08 (s, 3H), 1.83 – 1.72 (t, *J* = 6.0 Hz, 6H), 1.06 (m, 6H), 0.55 – 0.46 (m, 4H), 0.44 – 0.35 (t, *J* = 6.6 Hz, 6H). **<sup>13</sup>C NMR (101 MHz, C<sub>6</sub>D<sub>6</sub>)** δ 157.35, 142.20, 131.08, 113.61, 54.77, 53.59, 23.83, 20.29, 9.86, 9.62. **HRMS (ESI):** Exact mass calculated for C<sub>19</sub>H<sub>29</sub>GeNO [M+H]<sup>+</sup> 362.1539, found 362.1537.

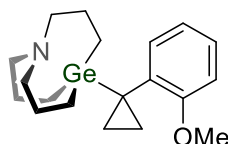

**5-(1-(2-methoxyphenyl)cyclopropyl)-1-aza-5-germabicyclo[3.3.3]undecane (2b).**

Synthesized by general procedure B, purified by silica gel column chromatography using petroleum ether/ethyl acetate = 100/1 as eluent to give title compound as light yellow solid in 62% yield.

**<sup>1</sup>H NMR (400 MHz, C<sub>6</sub>D<sub>6</sub>)** δ 7.03 (d, *J* = 7.3 Hz, 1H), 6.76 (t, *J* = 7.4 Hz, 1H), 6.63 (t, *J* = 7.4 Hz, 1H), 6.32 (d, *J* = 8.1 Hz, 1H), 3.18 (s, 3H), 1.86 – 1.76 (t, *J* = 5.6 Hz, 6H), 1.09 (m, 6H), 0.69 – 0.57 (m, 4H), 0.52 – 0.42 (t, *J* = 6.6 Hz, 6H). **<sup>13</sup>C NMR (101 MHz, C<sub>6</sub>D<sub>6</sub>)** δ 158.92, 138.40, 131.73, 125.55, 120.49, 110.29, 54.57, 53.73, 24.05, 17.22, 10.77, 10.12. **HRMS (ESI):** Exact mass calculated for C<sub>19</sub>H<sub>29</sub>GeNO [M+H]<sup>+</sup> 362.1539, found 362.1531.

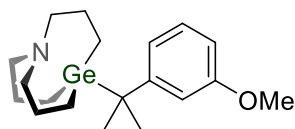

**5-(1-(3-methoxyphenyl)cyclopropyl)-1-aza-5-germabicyclo[3.3.3]undecane (2c).**

Synthesized by general procedure B, purified by silica gel column chromatography using petroleum ether/ethyl acetate = 100/1 as eluent to give title compound as colorless oil in 70% yield.

**<sup>1</sup>H NMR (400 MHz, C<sub>6</sub>D<sub>6</sub>)** δ 6.88 (s, 1H), 6.76 (m, 1H), 6.72 – 6.68 (m, 1H), 6.37 – 6.32 (m, 1H), 3.14 (s, 3H), 1.78 – 1.71 (t, *J* = 6.0 Hz, 6H), 1.08 – 0.98 (m, 6H), 0.57 – 0.54 (m, 2H), 0.50 – 0.46 (m, 2H), 0.40 (t, *J* = 6.6 Hz, 6H). **<sup>13</sup>C NMR (101 MHz, C<sub>6</sub>D<sub>6</sub>)** δ 159.88, 152.05, 128.85, 122.94, 116.43, 109.80, 54.65, 53.58, 23.80, 21.80, 9.89, 9.59. **HRMS (ESI):** Exact mass calculated for C<sub>19</sub>H<sub>29</sub>GeNO [M+H]<sup>+</sup> 362.1539, found 362.1544

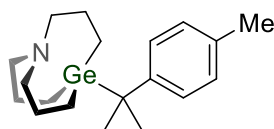

**5-(1-(p-tolyl)cyclopropyl)-1-aza-5-germabicyclo[3.3.3]undecane (2d).**

Synthesized by general procedure B, purified by silica gel column chromatography using petroleum ether as eluent to give title compound as white solid in 96% yield.

**<sup>1</sup>H NMR (400 MHz, C<sub>6</sub>D<sub>6</sub>)** δ 6.84 (d, *J* = 8.0 Hz, 2H), 6.62 (d, *J* = 7.9 Hz, 2H), 1.77 (s, 3H), 1.66 – 1.60 (t, *J* = 5.8 Hz, 6H), 0.92 (m, 6H), 0.43 – 0.35 (m, 4H), 0.30 – 0.23 (t, *J* = 6.6 Hz, 6H). **<sup>13</sup>C NMR (101 MHz, C<sub>6</sub>D<sub>6</sub>)** δ 147.25, 133.41, 130.31, 128.77, 53.59, 23.83, 21.13, 20.97, 9.85, 9.51. **HRMS (ESI):** Exact mass calculated for C<sub>19</sub>H<sub>29</sub>GeN [M+H]<sup>+</sup> 366.1044, found 346.1585.

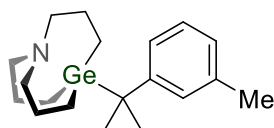

**5-(1-(m-tolyl)cyclopropyl)-1-aza-5-germabicyclo[3.3.3]undecane (2e).**

Synthesized by general procedure B, purified by silica gel column chromatography using petroleum ether as eluent to give title compound as white solid in 68% yield.

**<sup>1</sup>H NMR (400 MHz, C<sub>6</sub>D<sub>6</sub>)** δ 7.15 (m, 3H), 6.87 (d, *J* = 6.4 Hz, 1H), 2.22 (s, 3H), 2.08 – 2.01 (t, *J* = 5.6 Hz, 6H), 1.37 – 1.28 (m, 6H), 0.80 (m, 4H), 0.72 – 0.65 (t, *J* = 6.6 Hz, 6H). **<sup>13</sup>C NMR (101 MHz, C<sub>6</sub>D<sub>6</sub>)** δ 150.33, 137.00, 131.14, 127.98, 127.66, 125.36, 53.63, 23.86, 21.71, 21.49, 9.90, 9.51. **HRMS (ESI):** Exact mass calculated for C<sub>19</sub>H<sub>29</sub>GeN [M+H]<sup>+</sup> 346.1590, found 346.1582.

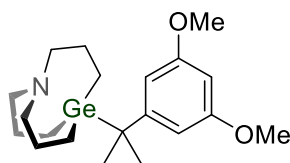

**5-(1-(3,5-dimethoxyphenyl)cyclopropyl)-1-aza-5-germabicyclo[3.3.3]undecane (2f).**

Synthesized by general procedure B, purified by silica gel column chromatography using petroleum ether/ethyl acetate = 30/1 as eluent to give title compound as colorless oil in 58% yield.

**<sup>1</sup>H NMR (400 MHz, C<sub>6</sub>D<sub>6</sub>)** δ 6.40 (m, 2H), 6.11 (m, 1H), 3.14 (s, 6H), 1.76 (t, *J* = 5.8 Hz, 6H), 1.04 (m, 6H), 0.59 (m, 2H), 0.48 (m, 2H), 0.45 – 0.40 (t, *J* = 6.6 Hz, 6H). **<sup>13</sup>C NMR (101 MHz, C<sub>6</sub>D<sub>6</sub>)** δ 161.60, 160.95, 152.76, 108.66, 104.46, 98.06, 96.98, 54.77, 53.61, 23.83, 22.24, 9.97, 9.70. **HRMS (ESI):** Exact mass calculated for C<sub>20</sub>H<sub>31</sub>GeNO<sub>2</sub> [M+H]<sup>+</sup> 392.1645, found 392.1649.

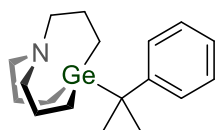

**5-(1-phenylcyclopropyl)-1-aza-5-germabicyclo[3.3.3]undecane (2g).** Synthesized by general procedure B, purified by silica gel column chromatography using petroleum

ether as eluent to give title compound as colorless oil in 63% yield.

**<sup>1</sup>H NMR (400 MHz, C<sub>6</sub>D<sub>6</sub>)** δ 7.04 (d, *J* = 7.7 Hz, 2H), 6.92 (m, 2H), 6.75 (m, 1H), 1.83 – 1.71 (t, *J* = 5.8 Hz, 6H), 1.11 – 0.98 (m, 6H), 0.49 (m, 4H), 0.42 – 0.33 (t, *J* = 6.6 Hz, 6H). **<sup>13</sup>C NMR (101 MHz, C<sub>6</sub>D<sub>6</sub>)** δ 150.38, 130.41, 128.02, 124.50, 53.61, 23.81, 21.60, 9.87, 9.48. **HRMS (ESI):** Exact mass calculated for C<sub>18</sub>H<sub>27</sub>GeN [M+H]<sup>+</sup> 332.1434, found 332.1421.

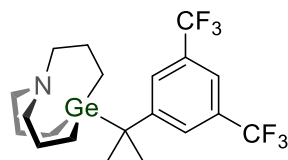

**5-(1-(3,5-bis(trifluoromethyl)phenyl)cyclopropyl)-1-aza-5-germabicyclo[3.3.3]undecane (2h).** Synthesized by general procedure B, using 3.0 equivalent Zn powder instead, purified by silica gel column chromatography using petroleum ether as eluent to give title compound as white solid in 61% yield.

**<sup>1</sup>H NMR (400 MHz, C<sub>6</sub>D<sub>6</sub>)** δ 7.46 (s, 2H), 7.39 (s, 1H), 1.73 – 1.65 (t, *J* = 5.8 Hz, 6H), 1.02 – 0.93 (m, 6H), 0.40 (m, 2H), 0.28 (m, 2H), 0.26 – 0.20 (t, *J* = 6.6 Hz, 6H). **<sup>13</sup>C NMR (101 MHz, C<sub>6</sub>D<sub>6</sub>)** δ 153.82, 131.10 (q, *J*<sub>CF</sub> = 32.5 Hz), 130.18 (d, *J*<sub>CF</sub> = 2.5 Hz), 128.53, 124.47 (d, *J*<sub>CF</sub> = 273.7 Hz), 120.40, 118.05, 118.01, 117.98, 117.94, 117.90, 53.34, 23.41, 22.45, 9.99, 9.58. **<sup>19</sup>F NMR (376 MHz, C<sub>6</sub>D<sub>6</sub>)** δ -62.45. **HRMS (ESI):** Exact mass calculated for C<sub>20</sub>H<sub>25</sub>F<sub>6</sub>GeN [M+H]<sup>+</sup> 468.1181, found 468.1179.

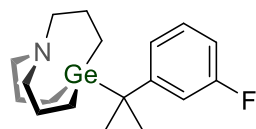

**5-(1-(3-fluorophenyl)cyclopropyl)-1-aza-5-germabicyclo[3.3.3]undecane (2i).** Synthesized by general procedure B, using 3.0 equivalent Zn powder instead, purified by silica gel column chromatography using petroleum ether as eluent to give title compound as colorless oil in 78% yield.

**<sup>1</sup>H NMR (400 MHz, C<sub>6</sub>D<sub>6</sub>)** δ 6.83 – 6.77 (m, 1H), 6.73 – 6.64 (m, 2H), 6.46 – 6.39 (m, 1H), 1.75 – 1.69 (t, *J* = 6.0 Hz, 6H), 1.00 (m, 6H), 0.44 – 0.39 (m, 4H), 0.34 – 0.27 (t, *J* = 6.6 Hz, 6H). **<sup>13</sup>C NMR (101 MHz, C<sub>6</sub>D<sub>6</sub>)** δ 163.17 (d, *J*<sub>CF</sub> = 244.4 Hz), 153.53 (d, *J*<sub>CF</sub> = 7.1 Hz), 129.27 (d, *J*<sub>CF</sub> = 8.6 Hz), 125.96 (d, *J*<sub>CF</sub> = 2.5 Hz), 116.94 (d, *J*<sub>CF</sub> = 20.0 Hz), 111.26 (d, *J*<sub>CF</sub> = 21.1 Hz), 53.49, 23.66, 21.84, 21.82, 12.10, 9.79, 9.58. **<sup>19</sup>F NMR (376 MHz, C<sub>6</sub>D<sub>6</sub>)** δ -114.46. **HRMS (ESI):** Exact mass calculated for C<sub>18</sub>H<sub>26</sub>FGeN [M+H]<sup>+</sup> 350.1339, found 350.1339

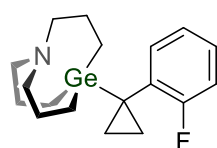

**5-(1-(2-fluorophenyl)cyclopropyl)-1-aza-5-germabicyclo[3.3.3]undecane (2j).**

Synthesized by general procedure B, using 3.0 equivalent Zn powder instead, purified by silica gel column chromatography using petroleum ether as eluent to give title compound as colorless oil in 59% yield.

**<sup>1</sup>H NMR (400 MHz, C<sub>6</sub>D<sub>6</sub>)** δ 6.94 (t, *J* = 7.6 Hz, 1H), 6.67 – 6.51 (m, 3H), 1.80 – 1.70 (t, *J* = 5.8 Hz, 6H), 1.10 – 0.99 (m, 6H), 0.56 (d, *J* = 10.6 Hz, 4H), 0.47 – 0.38 (t, *J* = 6.4 Hz, 6H). **<sup>13</sup>C NMR (101 MHz, C<sub>6</sub>D<sub>6</sub>)** δ 162.60 (d, *J*<sub>CF</sub> = 246.4 Hz), 137.39 (d, *J*<sub>CF</sub> = 14.1 Hz), 132.65 (d, *J*<sub>CF</sub> = 4.9 Hz), 125.85 (d, *J*<sub>CF</sub> = 8.0 Hz), 123.71 (d, *J*<sub>CF</sub> = 3.4 Hz), 115.37 (d, *J*<sub>CF</sub> = 22.6 Hz), 53.57, 23.76, 15.93, 9.88. **<sup>19</sup>F NMR (376 MHz, C<sub>6</sub>D<sub>6</sub>)** δ -113.18. **HRMS (ESI):** Exact mass calculated for C<sub>18</sub>H<sub>26</sub>FGeN [M+H]<sup>+</sup> 350.1339, found 350.1330.

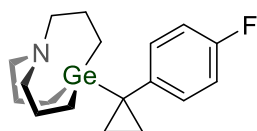

**5-(1-(4-fluorophenyl)cyclopropyl)-1-aza-5-germabicyclo[3.3.3]undecane (2k).**

Synthesized by general procedure B, using 3.0 equivalent Zn powder instead, purified by silica gel column chromatography using petroleum ether as eluent to give title compound as colorless oil in 77% yield.

**<sup>1</sup>H NMR (400 MHz, C<sub>6</sub>D<sub>6</sub>)** δ 6.83 – 6.76 (m, 2H), 6.60 – 6.53 (m, 2H), 1.80 – 1.72 (t, *J* = 5.8 Hz, 6H), 1.08 – 0.98 (m, 6H), 0.46 – 0.38 (m, 4H), 0.31 (t, *J* = 6.6 Hz, 6H). **<sup>13</sup>C NMR (101 MHz, C<sub>6</sub>D<sub>6</sub>)** δ 160.79 (d, *J*<sub>CF</sub> = 242.4 Hz), 146.00 (d, *J*<sub>CF</sub> = 3.0 Hz), 131.43 (d, *J*<sub>CF</sub> = 7.5 Hz), 114.63 (d, *J*<sub>CF</sub> = 20.8 Hz), 53.54, 23.73, 20.59, 9.77, 9.59. **<sup>19</sup>F NMR (376 MHz, C<sub>6</sub>D<sub>6</sub>)** δ -119.42. **HRMS (ESI):** Exact mass calculated for C<sub>18</sub>H<sub>26</sub>FGeN [M+H]<sup>+</sup> 350.1339, found 350.1335.

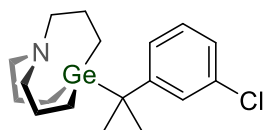

**5-(1-(3-chlorophenyl)cyclopropyl)-1-aza-5-germabicyclo[3.3.3]undecane (2l).**

Synthesized by general procedure B, using 3.0 equivalent Zn powder instead, purified by silica gel column chromatography using petroleum ether as eluent to give title compound as colorless oil in 75% yield.

**<sup>1</sup>H NMR (400 MHz, C<sub>6</sub>D<sub>6</sub>)** δ 7.40 (m, 1H), 7.06 – 6.98 (m, 2H), 6.88 (m, 1H), 2.01 – 1.94 (t, *J* = 6.0 Hz, 6H), 1.29 – 1.21 (m, 6H), 0.70 – 0.63 (m, 4H), 0.58 – 0.53 (t, *J* = 6.6 Hz, 6H). **<sup>13</sup>C NMR (101 MHz, C<sub>6</sub>D<sub>6</sub>)** δ 153.00, 133.82, 130.39, 129.24, 128.52, 124.61, 53.46, 23.64, 21.77, 9.77, 9.51. **HRMS (ESI):** Exact mass calculated for C<sub>18</sub>H<sub>26</sub>ClGeN [M+H]<sup>+</sup> 366.1044, found 366.1041

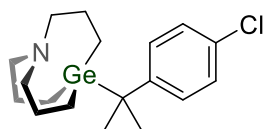

**5-(1-(4-chlorophenyl)cyclopropyl)-1-aza-5-germabicyclo[3.3.3]undecane (2m).**

Synthesized by general procedure B, using 3.0 equivalent Zn powder instead, purified by silica gel column chromatography using petroleum ether as eluent to give title compound as colorless oil in 54% yield.

**$^1\text{H}$  NMR (400 MHz,  $\text{C}_6\text{D}_6$ )**  $\delta$  6.94 – 6.87 (d,  $J$  = 8.0 Hz, 2H), 6.78 (d,  $J$  = 8.2 Hz, 2H), 1.84 – 1.76 (t,  $J$  = 5.8 Hz, 6H), 1.11 – 1.01 (m, 6H), 0.44 (m, 4H), 0.36 – 0.28 (t,  $J$  = 6.6 Hz, 6H).  **$^{13}\text{C}$  NMR (101 MHz,  $\text{C}_6\text{D}_6$ )**  $\delta$  149.04, 131.60, 129.98, 53.56, 23.72, 21.09, 9.81, 9.53. **HRMS (ESI):** Exact mass calculated for  $\text{C}_{18}\text{H}_{26}\text{ClGeN}$   $[\text{M}+\text{H}]^+$  366.1044, found 366.1033.

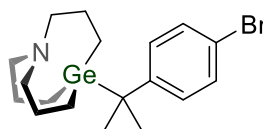

**5-(1-(4-bromophenyl)cyclopropyl)-1-aza-5-germabicyclo[3.3.3]undecane (2n).**

Synthesized by general procedure B, using 3.0 equivalent Zn powder instead, purified by silica gel column chromatography using petroleum ether as eluent to give title compound as colorless oil in 66% yield.

**$^1\text{H}$  NMR (400 MHz,  $\text{C}_6\text{D}_6$ )**  $\delta$  7.00 (d,  $J$  = 8.0 Hz, 2H), 6.68 (d,  $J$  = 8.1 Hz, 2H), 1.79 – 1.71 (t,  $J$  = 5.8 Hz, 6H), 1.07 – 0.97 (m, 6H), 0.40 (m, 4H), 0.32 – 0.23 (t,  $J$  = 6.6 Hz, 6H).  **$^{13}\text{C}$  NMR (101 MHz,  $\text{C}_6\text{D}_6$ )**  $\delta$  149.56, 132.05, 131.02, 117.98, 53.55, 23.71, 21.18, 9.80, 9.49. **HRMS (ESI):** Exact mass calculated for  $\text{C}_{18}\text{H}_{26}\text{BrGeN}$   $[\text{M}+\text{H}]^+$  410.0539, found 410.0537.

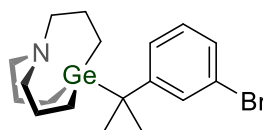

**5-(1-(3-bromophenyl)cyclopropyl)-1-aza-5-germabicyclo[3.3.3]undecane (2o).**

Synthesized by general procedure B, using 3.0 equivalent Zn powder instead, purified by silica gel column chromatography using petroleum ether as eluent to give title compound as colorless oil in 82% yield.

**$^1\text{H}$  NMR (400 MHz,  $\text{C}_6\text{D}_6$ )**  $\delta$  7.29 (m, 1H), 6.88 (s, 1H), 6.80 (d,  $J$  = 7.6 Hz, 1H), 6.54 (t,  $J$  = 7.8 Hz, 1H), 1.74 – 1.66 (t,  $J$  = 6.0 Hz, 6H), 0.98 (m, 6H), 0.41 – 0.34 (m, 4H), 0.31 – 0.25 (t,  $J$  = 6.4 Hz, 6H).  **$^{13}\text{C}$  NMR (101 MHz,  $\text{C}_6\text{D}_6$ )**  $\delta$  153.33, 133.31, 129.55, 128.94, 127.52, 122.28, 53.45, 23.64, 21.80, 9.76, 9.52. **HRMS (ESI):** Exact mass calculated for  $\text{C}_{18}\text{H}_{26}\text{BrGeN}$   $[\text{M}+\text{H}]^+$  410.0539, found 410.0526.

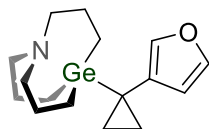

**5-(1-(furan-3-yl)cyclopropyl)-1-aza-5-germabicyclo[3.3.3]undecane (2p).**

Synthesized by general procedure B, using DMAc as solvent instead at 80 °C, purified by silica gel column chromatography using petroleum ether/ethyl acetate = 100/1 as eluent to give title compound as colorless oil in 39% yield.

**<sup>1</sup>H NMR (400 MHz, C<sub>6</sub>D<sub>6</sub>)** δ 6.90 – 6.87 (m, 1H), 6.85 (m, 1H), 5.96 (m, 1H), 1.84 – 1.77 (t, J = 5.8 Hz, 6H), 1.12 – 1.02 (m, 6H), 0.40 – 0.33 (m, 10H). **<sup>13</sup>C NMR (101 MHz, C<sub>6</sub>D<sub>6</sub>)** δ 142.11, 139.61, 133.43, 112.65, 53.77, 23.77, 10.04, 9.34. **HRMS (ESI):** Exact mass calculated for C<sub>16</sub>H<sub>25</sub>GeNO [M+H]<sup>+</sup> 322.1226, found 322.1223.

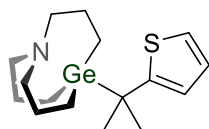

**5-(1-(thiophen-2-yl)cyclopropyl)-1-aza-5-germabicyclo[3.3.3]undecane (2q).**

Synthesized by general procedure B, purified by silica gel column chromatography using petroleum ether as eluent to give title compound as colorless oil in 97% yield.

**<sup>1</sup>H NMR (400 MHz, C<sub>6</sub>D<sub>6</sub>)** δ 6.37 – 6.31 (m, 3H), 1.63 – 1.55 (t, J = 5.8 Hz, 6H), 0.89 (m, 6H), 0.49 (m, 2H), 0.33 (m, 2H), 0.31 – 0.24 (t, J = 6.6 Hz, 6H). **<sup>13</sup>C NMR (101 MHz, C<sub>6</sub>D<sub>6</sub>)** δ 155.73, 126.52, 123.93, 121.26, 53.68, 23.89, 23.72, 23.54, 15.33, 11.65, 10.12. **HRMS (ESI):** Exact mass calculated for C<sub>16</sub>H<sub>25</sub>GeNS [M+H]<sup>+</sup> 338.0998, found 338.0993.

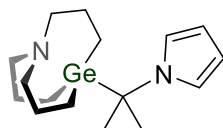

**5-(1-(1H-pyrrol-1-yl)cyclopropyl)-1-aza-5-germabicyclo[3.3.3]undecane (2r).**

Synthesized by general procedure B, purified by silica gel column chromatography using petroleum ether as eluent to give title compound as light yellow oil in 51% yield.

**<sup>1</sup>H NMR (400 MHz, C<sub>6</sub>D<sub>6</sub>)** δ 6.46 (m, 2H), 6.05 (m, 2H), 1.74 – 1.65 (t, J = 5.8 Hz, 6H), 0.98 (m, 6H), 0.67 – 0.58 (m, 2H), 0.28 (t, J = 6.6 Hz, 8H). **<sup>13</sup>C NMR (101 MHz, C<sub>6</sub>D<sub>6</sub>)** δ 121.54, 107.47, 53.41, 35.46, 23.36, 10.27, 9.89. **HRMS (ESI):** Exact mass calculated for C<sub>16</sub>H<sub>26</sub>GeN<sub>2</sub> [M+H]<sup>+</sup> 321.1386, found 321.1376.

### 3. Experimental Procedure of Cross-Coupling Reactions and Compound Characterization Data for Scheme 3

#### 3.1 Table 2-3. Condition optimization of cross-coupling reactions

Palladium catalyst, ligand, and CuCl were weighed and transferred to a screw-cap tube with stir bar. The tube was evacuated and backfilled three times with argon, then 5-(1-(4-methoxyphenyl)cyclopropyl)-1-aza-5-germabicyclo[3.3.3]undecane (**2a**) (0.05 mmol, 18 mg, 1.0 equiv.), bromobenzene (0.06 mmol, 6.5  $\mu$ L, 1.2 equiv.) and solvent (0.5 mL) were added and the screw-cap tube was sealed with a teflon stopper and heated to 100  $^{\circ}$ C for 16 hours. At the end of the reaction, the reaction mixture was cooled to room temperature and added saturated sodium chloride aqueous solution, extracted with ethyl acetate. Organic layer was separated and calculated yield by GC based on benzophenone as internal standard.

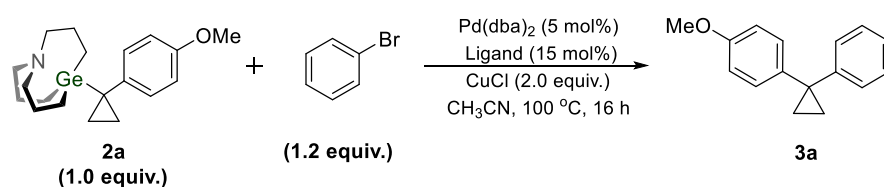

Table 2. Ligand Optimization of Cross-Coupling Reactions<sup>a,b</sup>

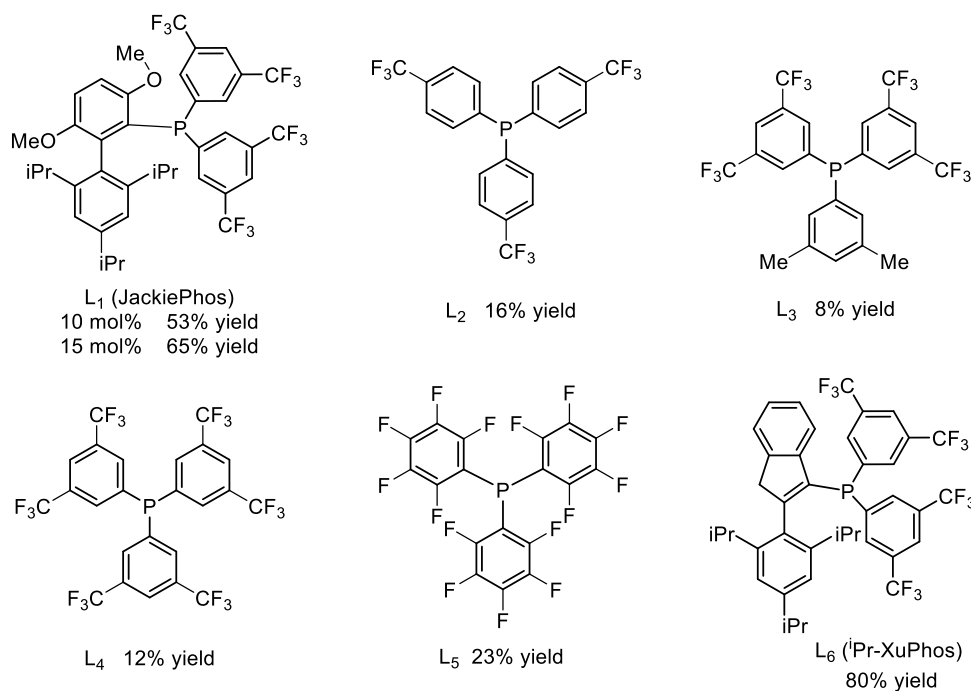

<sup>a</sup>All reactions were carried out in 0.05 mmol scale. <sup>b</sup>Yields of **3a** were determined by GC using benzophenone as internal standard.



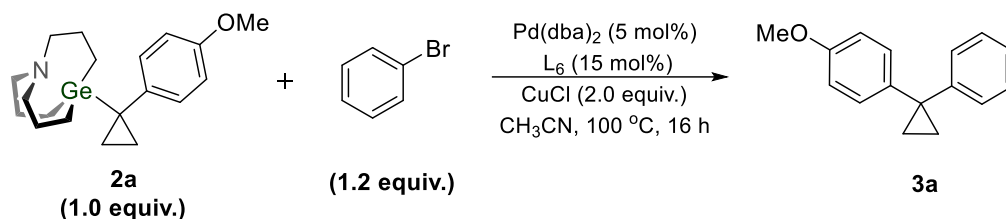

**Table 3. Condition Optimization of Cross-Coupling Reactions<sup>a</sup>**

| Entry | Change of standard conditions                                      | Yield/% <sup>b</sup> |
|-------|--------------------------------------------------------------------|----------------------|
| 1     | Pd(OAc) <sub>2</sub> instead of Pd(dba) <sub>2</sub>               | 64                   |
| 2     | Pd <sub>2</sub> (dba) <sub>3</sub> instead of Pd(dba) <sub>2</sub> | 61                   |
| 3     | PdCl <sub>2</sub> instead of Pd(dba) <sub>2</sub>                  | 34                   |
| 4     | 0.2 equiv. of CuCl was used                                        | 22                   |
| 5     | 1.0 equiv. of CuCl was used                                        | 30                   |
| 6     | No CuCl                                                            | trace                |
| 7     | 2.0 equiv. of KF as additive                                       | 51                   |
| 8     | Toluene instead of CH <sub>3</sub> CN                              | 65                   |
| 9     | Dioxane instead of CH <sub>3</sub> CN                              | 92                   |
| 10    | THF instead of CH <sub>3</sub> CN                                  | <b>96</b>            |
| 11    | DMF instead of CH <sub>3</sub> CN                                  | 12                   |

<sup>a</sup>All reactions were carried out in 0.05 mmol scale. <sup>b</sup>Yields of 3a were determined by GC using benzophenone as internal standard.

### 3.2 Preparation and characterization data of cross-coupling product

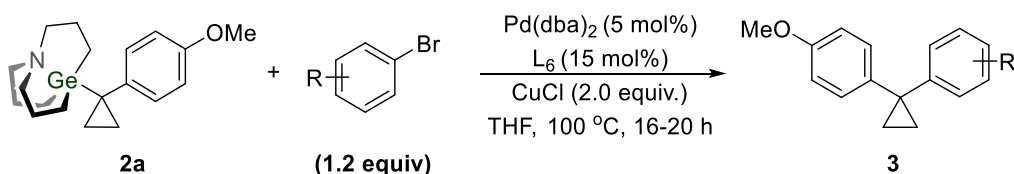

**General procedure C for cross-coupling reaction:** Pd(dba)<sub>2</sub> (0.01 mmol, 5.8 mg, 5 mol%), <sup>i</sup>Pr-XuPhos (L<sub>6</sub>) (0.03 mmol, 23.3 mg, 15 mol%), CuCl (0.4 mmol, 39.6 mg, 2.0 equiv.) and aryl bromide (0.24 mmol, 1.2 equiv.) (If aryl bromide is liquid, added it after filling with argon) were weighed and transferred to a screw-cap tube with stir bar. The tube was evacuated and backfilled three times with argon, then 5-(1-(4-methoxyphenyl)cyclopropyl)-1-aza-5-germabicyclo[3.3.3]undecane (**2a**) (0.20 mmol, 72 mg, 1.0 equiv.) and THF (1.0 mL) were added, the screw-cap tube was sealed with a teflon stopper and heated to 100 °C for 16 hours. At the end of the reaction, the reaction mixture was cooled to room temperature and added saturated sodium chloride aqueous solution, extracted with ethyl acetate. Organic layer was separated, dried over Na<sub>2</sub>SO<sub>4</sub>, concentrated under reduced pressure to give crude product, which was purified by preparative TLC.

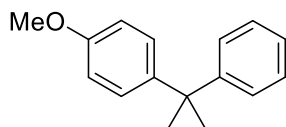

**1-methoxy-4-(1-phenylcyclopropyl)benzene (3a).** Prepared according to general procedure C outlined above, purified by preparative TLC using petroleum ether/ethyl acetate = 100/1 as eluent to give title compound as colorless oil in 90% yield. 3a is an known compound, and NMR data of 3a matched with previous report.<sup>9</sup>

**<sup>1</sup>H NMR (400 MHz, CDCl<sub>3</sub>)** δ 7.19 – 7.05 (m, 4H), 6.76 – 6.71 (m, 1H), 3.68 (s, 2H), 1.17 (s, 2H). **<sup>13</sup>C NMR (101 MHz, CDCl<sub>3</sub>)** δ 157.97, 146.38, 137.86, 129.97, 128.32, 128.00, 125.83, 113.75, 55.36, 29.27, 16.47. **HRMS (ESI):** Exact mass calculated for C<sub>16</sub>H<sub>16</sub>O [M+H]<sup>+</sup> 225.1279, found 225.12733.

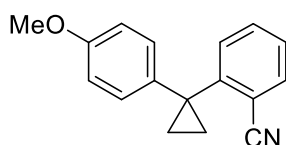

**2-(1-(4-methoxyphenyl)cyclopropyl)benzonitrile (3b).** Prepared according to general procedure C outlined above and reaction stopped after 20 hours, purified by preparative TLC using petroleum ether/ethyl acetate = 30/1 as eluent to give title compound as colorless oil in 71% yield.

**<sup>1</sup>H NMR (400 MHz, CDCl<sub>3</sub>)** δ 7.66 – 7.50 (m, 3H), 7.31 – 7.23 (m, 3H), 6.81 – 6.76 (m, 2H), 3.74 (s, 3H), 1.44 – 1.37 (m, 2H), 1.36 – 1.30 (m, 2H). **<sup>13</sup>C NMR (101 MHz, CDCl<sub>3</sub>)** δ 158.16, 149.47, 136.18, 133.50, 132.91, 131.40, 129.02, 127.14, 118.50, 114.36, 113.84, 55.32, 29.19, 15.25. **HRMS (ESI):** Exact mass calculated for C<sub>17</sub>H<sub>15</sub>NO [M+H]<sup>+</sup> 250.1232, found 250.1231.

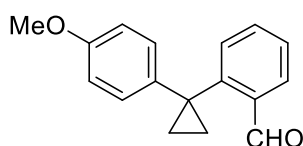

**2-(1-(4-methoxyphenyl)cyclopropyl)benzaldehyde (3c).** Prepared according to general procedure C outlined above and reaction stopped after 20 hours, purified by preparative TLC using petroleum ether/ethyl acetate = 20/1 as eluent to give title compound as colorless oil in 58% yield.

**<sup>1</sup>H NMR (400 MHz, CDCl<sub>3</sub>)** δ 10.61 (s, 1H), 7.91 (d, *J* = 7.6 Hz, 1H), 7.58 (m, 2H), 7.41 (m, 1H), 6.94 – 6.88 (m, 2H), 6.78 – 6.72 (m, 2H), 3.73 (s, 3H), 1.48 – 1.36 (m, 4H). **<sup>13</sup>C NMR (101 MHz, CDCl<sub>3</sub>)** δ 192.62, 157.75, 147.72, 143.46, 137.81, 135.22, 134.29, 131.63, 130.63, 129.09, 128.52, 128.06, 127.56, 126.89, 125.53, 113.97, 55.37, 26.13, 17.46. **HRMS (ESI):** Exact mass calculated for C<sub>17</sub>H<sub>16</sub>O<sub>2</sub> [M+H]<sup>+</sup> 253.1229, found 253.12218.

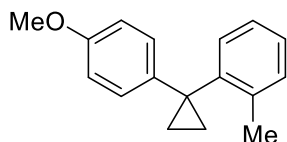

**1-(1-(4-methoxyphenyl)cyclopropyl)-2-methylbenzene (3d).** Prepared according to general procedure C outlined above and reaction stopped after 20 hours, purified by preparative TLC using petroleum ether/ethyl acetate = 100/1 as eluent to give title compound as colorless oil in 63% yield.

**<sup>1</sup>H NMR (400 MHz, CDCl<sub>3</sub>)** δ 7.36 – 7.31 (m, 1H), 7.13 – 7.04 (m, 3H), 6.83 – 6.78 (m, 2H), 6.68 – 6.62 (m, 2H), 3.65 (s, 3H), 2.15 (s, 3H), 1.21 (m, 2H), 1.16 (m, 2H). **<sup>13</sup>C NMR (101 MHz, CDCl<sub>3</sub>)** δ 157.36, 141.06, 138.11, 134.14, 133.05, 128.66, 128.22, 127.66, 126.81, 125.96, 125.85, 125.61, 113.61, 55.28, 26.96, 17.72, 1.18. **HRMS (ESI):** Exact mass calculated for C<sub>17</sub>H<sub>18</sub>O [M+H]<sup>+</sup>: 239.1436, found 239.1430.

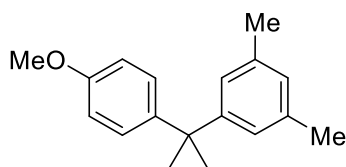

**1-(1-(4-methoxyphenyl)cyclopropyl)-3,5-dimethylbenzene (3e).** Prepared according to general procedure C outlined above, purified by preparative TLC using petroleum ether/ethyl acetate = 100/1 as eluent to give title compound as colorless oil in 72% yield.

**<sup>1</sup>H NMR (400 MHz, CDCl<sub>3</sub>)** δ 7.12 – 7.08 (m, 2H), 6.77 – 6.68 (m, 5H), 3.68 (s, 3H), 2.17 (s, 6H), 1.17 – 1.09 (m, 4H). **<sup>13</sup>C NMR (101 MHz, CDCl<sub>3</sub>)** δ 157.87, 146.27, 138.18, 137.78, 129.85, 127.62, 126.00, 113.70, 55.35, 29.18, 21.48, 16.24. **HRMS (ESI):** Exact mass calculated for C<sub>18</sub>H<sub>20</sub>O [M+H]<sup>+</sup> 253.1592, found 253.1582.

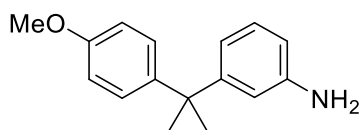

**3-(1-(4-methoxyphenyl)cyclopropyl)aniline (3f).** Prepared according to general procedure C outlined above, purified by preparative TLC using petroleum ether/ethyl acetate = 8/1 as eluent to give title compound as colorless oil in 65% yield.

**<sup>1</sup>H NMR (400 MHz, CDCl<sub>3</sub>)** δ 7.21 – 7.15 (m, 2H), 7.03 (t, *J* = 7.7 Hz, 1H), 6.85 – 6.77 (m, 2H), 6.58 (d, *J* = 7.8 Hz, 1H), 6.47 (m, 2H), 3.77 (s, 3H), 1.29 – 1.16 (m, 4H). **<sup>13</sup>C NMR (101 MHz, CDCl<sub>3</sub>)** δ 157.89, 147.63, 146.28, 137.92, 129.98, 129.21, 118.11, 115.13, 113.66, 112.76, 55.35, 29.15, 16.39. **HRMS (ESI):** Exact mass calculated for C<sub>16</sub>H<sub>17</sub>NO [M+H]<sup>+</sup> 240.1388, found 240.13820.

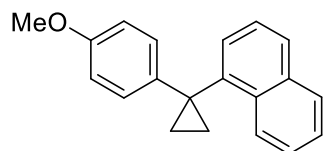

**1-(1-(4-methoxyphenyl)cyclopropyl)naphthalene (3g).** Prepared according to general procedure C outlined above, purified by preparative TLC using petroleum ether/ethyl acetate = 100/1 as eluent to give title compound as colorless oil in 87% yield. **<sup>1</sup>H NMR (400 MHz, CDCl<sub>3</sub>)** δ 8.18 (m, 1H), 7.86 – 7.74 (m, 2H), 7.61 (m, 1H), 7.48 – 7.35 (m, 3H), 6.95 – 6.89 (m, 2H), 6.71 – 6.65 (m, 2H), 3.67 (s, 3H), 1.54 – 1.33 (m, 4H). **<sup>13</sup>C NMR (101 MHz, CDCl<sub>3</sub>)** δ 157.36, 141.06, 138.11, 134.14, 133.05, 128.66, 128.22, 127.66, 126.81, 125.96, 125.85, 125.61, 113.61, 55.28, 26.96, 17.72, 1.18. **HRMS (ESI):** Exact mass calculated for C<sub>20</sub>H<sub>18</sub>O [M+H]<sup>+</sup> 275.1436, found 275.1427.

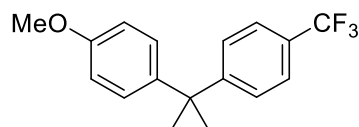

**1-methoxy-4-(1-(4-(trifluoromethyl)phenyl)cyclopropyl)benzene (3h).** Prepared according to general procedure C outlined above, purified by preparative TLC using petroleum ether/ethyl acetate = 100/1 as eluent to give title compound as colorless oil in 78% yield. 3h is an known compound, and NMR data of 3j matched with previous report.<sup>9a</sup>

**<sup>1</sup>H NMR (400 MHz, CDCl<sub>3</sub>)** δ 7.39 (m, 2H), 7.17 – 7.09 (m, 4H), 6.78 – 6.73 (m, 2H), 3.69 (s, 3H), 1.26 – 1.16 (m, 4H). **<sup>13</sup>C NMR (101 MHz, CDCl<sub>3</sub>)** δ 158.34, 150.73(q, J = 1.0 Hz), 136.63, 127.94 (q, J = 33.0 Hz), 127.86, 125.26 (q, J = 15.0 Hz), 124.46(q, J = 270.1 Hz), 113.98, 55.38, 29.24, 16.95. **<sup>19</sup>F NMR (376 MHz, CDCl<sub>3</sub>)** δ -62.23.

**HRMS (ESI):** Exact mass calculated for C<sub>17</sub>H<sub>15</sub>F<sub>3</sub>O [M+H]<sup>+</sup> 293.1153, found 293.1140.

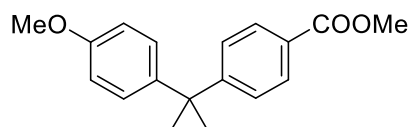

**Methyl 4-(1-(4-methoxyphenyl)cyclopropyl)benzoate (3i).** Prepared according to general procedure C outlined above, purified by preparative TLC using petroleum ether/ethyl acetate = 30/1 as eluent to give title compound as colorless oil in 92% yield. **<sup>1</sup>H NMR (400 MHz, CDCl<sub>3</sub>)** δ 7.90 (d, J = 8.3 Hz, 2H), 7.19 (m, 4H), 6.87 – 6.81 (m, 2H), 3.87 (s, 3H), 3.78 (s, 3H), 1.36 – 1.25 (m, 4H). **<sup>13</sup>C NMR (101 MHz, CDCl<sub>3</sub>)** δ 167.12, 158.24, 152.07, 136.65, 130.41, 129.61, 127.47, 127.35, 113.89, 55.34, 52.08, 29.34, 17.19. **HRMS (ESI):** Exact mass calculated for C<sub>18</sub>H<sub>18</sub>O<sub>3</sub> [M+H]<sup>+</sup> 283.1334, found 283.1332.

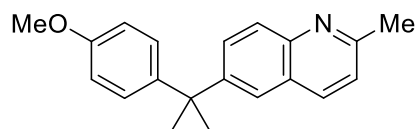

**6-(1-(4-methoxyphenyl)cyclopropyl)-2-methylquinoline (3j).** Prepared according to general procedure C outlined above, purified by preparative TLC using petroleum ether/ethyl acetate = 6/1 as eluent to give title compound as light yellow oil in 59% yield.

**<sup>1</sup>H NMR (400 MHz, CDCl<sub>3</sub>)** δ 7.92 (m, 2H), 7.55 – 7.50 (m, 2H), 7.25 – 7.20 (m, 3H), 6.87 – 6.81 (m, 2H), 3.78 (s, 3H), 2.71 (s, 3H), 1.39 – 1.30 (m, 4H). **<sup>13</sup>C NMR (101 MHz, CDCl<sub>3</sub>)** δ 157.89, 147.63, 146.28, 145.91, 137.92, 129.98, 129.21, 118.11, 115.13, 113.66, 112.76, 55.35, 29.15, 16.39. **HRMS (ESI):** Exact mass calculated for C<sub>20</sub>H<sub>19</sub>NO [M+H]<sup>+</sup> 290.1545, found 290.15347.

## 4. Mechanism Experiment

### 4.1 Scheme 4. TEMPO captures experiment

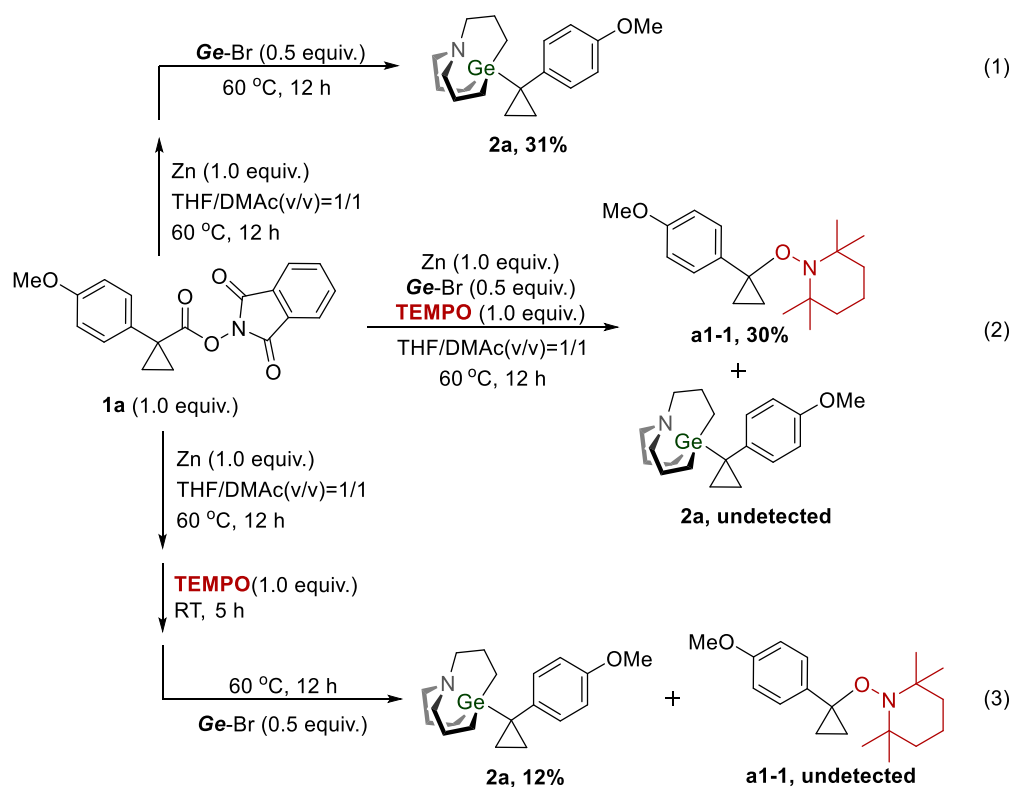

**Equation (1):** To an oven-dried screw-cap tube equipped with stir bar was charged with 1,3-dioxoisindolin-2-yl 1-(4-methoxyphenyl)cyclopropane-1-carboxylate (**1a**) (0.3 mmol, 101.2 mg, 1.0 equiv.) and Zn powder (0.3 mmol, 19.5 mg, 1.0 equiv.). The tube was vacuumed and backfilled with argon for three cycles. Then DMAc (0.75 mL) and

THF (0.75 mL) were added through syringe and the tube was sealed with a teflon stopper and stirred at 60 °C for 12 hours. 12 hours later, a clean yellow solution was obtained, to which **Ge-Br** (0.15 mmol, 43.8 mg, 0.5 equiv.) was added under argon atmosphere. The mixture was stirred at 60 °C for further 12 hours, then quenched with NH<sub>4</sub>Cl (sat, aq), extracted with ethyl acetate. Organic layer was separated, dried over Na<sub>2</sub>SO<sub>4</sub>, concentrated under reduced pressure to give crude product, which was purified by silica gel column chromatography using petroleum ether/ethyl acetate = 100/1 as eluent to give **2a** in 31% yield.

**Equation (2):** To an oven-dried screw-cap tube equipped with stir bar was charged with 1,3-dioxoisindolin-2-yl 1-(4-methoxyphenyl)cyclopropane-1-carboxylate (**1a**) (0.3 mmol, 101.2 mg, 1.0 equiv.), Zn powder (0.3 mmol, 19.5 mg, 1.0 equiv.), **Ge-Br** (0.15 mmol, 43.8 mg, 0.5 equiv.) and TEMPO (0.3 mmol, 46.9 mg, 1.0 equiv.). The tube was vacuumed and backfilled with argon for three cycles, then DMAc (0.75 mL) and THF (0.75 mL) were added through syringe and the tube was sealed with a teflon stopper and stirred at 60 °C for 12 hours. 12 hours later, quenched with NH<sub>4</sub>Cl (sat, aq), then extracted with ethyl acetate. Organic layer was separated, dried over Na<sub>2</sub>SO<sub>4</sub>, concentrated under reduced pressure to give crude product, which was purified by silica gel column chromatography using petroleum ether/ethyl acetate = 10/1 as eluent to give TEMPO-captured product (**a1-1**) in 30% yield and **2a** was not detected.

**Equation (3):** To an oven-dried screw-cap tube equipped with stir bar was charged with 1,3-dioxoisindolin-2-yl 1-(4-methoxyphenyl)cyclopropane-1-carboxylate (**1a**) (0.3 mmol, 101.2 mg, 1.0 equiv.) and Zn powder (0.3 mmol, 19.5 mg, 1.0 equiv.). The tube was vacuumed and backfilled with argon for three cycles, then DMAc (0.75 mL) and THF (0.75 mL) were added through syringe and the tube was sealed with a teflon stopper and stirred at 60 °C for 12 hours. 12 hours later, a clean yellow solution was obtained, to which TEMPO (0.3 mmol, 46.9 mg, 1.0 equiv.) was added under argon atmosphere. The mixture was stirred at room temperature for 5 hours followed by the addition of **Ge-Br** (0.15 mmol, 43.8 mg, 0.5 equiv.) under argon atmosphere and stirred for further 12 hours at 60 °C. 12 hours later, the reaction was quenched with NH<sub>4</sub>Cl (sat, aq), extracted with ethyl acetate. Organic layer was separated, dried over Na<sub>2</sub>SO<sub>4</sub>, concentrated under reduced pressure to give crude product, which was purified by silica gel column chromatography using petroleum ether/ethyl acetate = 100/1 as eluent to give **2a** in 12% yield and TEMPO-captured product (**a1-1**) was not detected.

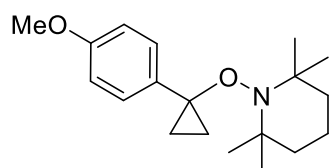

**1-(1-(4-methoxyphenyl)cyclopropoxy)-2,2,6,6-tetramethylpiperidine (**a1-1**).**

Purified by preparative TLC using petroleum ether/ethyl acetate = 10/1 as eluent to give title compound as colorless oil.

**<sup>1</sup>H NMR (400 MHz, CDCl<sub>3</sub>)** δ 7.30 (d, *J* = 7.3 Hz, 2H), 6.85 (d, *J* = 7.3 Hz, 2H), 3.80 (s, 3H), 1.67 – 1.54 (m, 4H), 1.51 (d, *J* = 14.1 Hz, 1H), 1.43 (d, *J* = 12.2 Hz, 2H), 1.33 (d, *J* = 11.7 Hz, 1H), 1.13 (s, 2H), 1.01 (s, 6H), 0.82 (s, 6H). **<sup>13</sup>C NMR (101 MHz, CDCl<sub>3</sub>)** δ 174.34, 158.59, 132.05, 131.60, 113.43, 60.13, 55.33, 38.81, 31.79, 27.81, 20.38, 16.93, 16.26. **HRMS (ESI):** Exact mass calculated for C<sub>19</sub>H<sub>29</sub>NO<sub>2</sub> [M+H]<sup>+</sup> 304.2277, found 304.2280.

## 4.2 Radical probe experiments

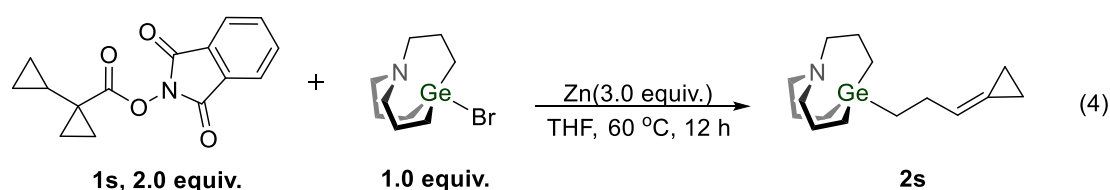

**Equation 4:** To an oven-dried screw-cap tube equipped with stir bar was charged with **1s** (0.6 mmol, 162.8 mg), **Ge-Br** (0.3 mmol, 87.6 mg) and Zn powder (0.9 mmol, 58.5 mg). The tube was vacuumed and backfilled with argon for three cycles. THF (1.5 mL) was added through syringe and the tube was sealed with a teflon stopper and stirred at 60 °C for 12 hours. The reaction was quenched with NH<sub>4</sub>Cl (sat, aq), extracted with ethyl acetate. Organic layer was separated, dried over Na<sub>2</sub>SO<sub>4</sub>, concentrated under reduced pressure to give crude product, which was purified by silica gel column chromatography using petroleum ether as eluent to give **2s** in 72% yield as colorless oil.

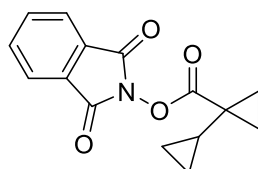

### 1,3-dioxoisindolin-2-yl [1,1'-bi(cyclopropane)]-1-carboxylate (**1s**).

2 mmol 1-(2-methoxyphenyl)cyclopropane-1-carboxylic acid was applied in the general procedure A. Purified by recrystallization from DCM/MeOH to give title compound as white solid in 81% yield.

**<sup>1</sup>H NMR (400 MHz, CDCl<sub>3</sub>)** δ 7.92 – 7.85 (m, 2H), 7.82 – 7.75 (m, 2H), 1.66 – 1.59 (m, 1H), 1.41 (q, *J* = 4.4 Hz, 2H), 0.87 (q, *J* = 4.4 Hz, 2H), 0.61 – 0.53 (m, 2H), 0.23 – 0.14 (m, 2H). **<sup>13</sup>C NMR (101 MHz, CDCl<sub>3</sub>)** δ 172.28, 162.28, 134.79, 129.18, 124.02, 23.68, 14.99, 10.90, 3.09. **HRMS (ESI):** Exact mass calculated for C<sub>15</sub>H<sub>13</sub>NO<sub>4</sub> [M+H]<sup>+</sup> 272.0923, found 272.0928.

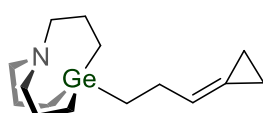

**5-(3-cyclopropylidenepropyl)-1-aza-5-germabicyclo[3.3.3]undecane (2s).**

**<sup>1</sup>H NMR (400 MHz, C<sub>6</sub>D<sub>6</sub>)** δ 6.09 – 5.99 (m, 1H), 2.51 – 2.41 (m, 2H), 2.21 – 2.14 (m, 6H), 1.42 (m, 6H), 1.02 (m, 4H), 0.81 – 0.74 (m, 2H), 0.73 – 0.66 (m, 6H). **<sup>13</sup>C NMR (101 MHz, CDCl<sub>3</sub>)** δ 172.28, 162.28, 134.79, 129.18, 124.02, 23.68, 14.99, 10.90, 3.09. **HRMS (ESI):** Exact mass calculated for C<sub>15</sub>H<sub>27</sub>GeN [M+H]<sup>+</sup> 296.1434, found 296.1440.

**4.3 Deuterium labeling studies**

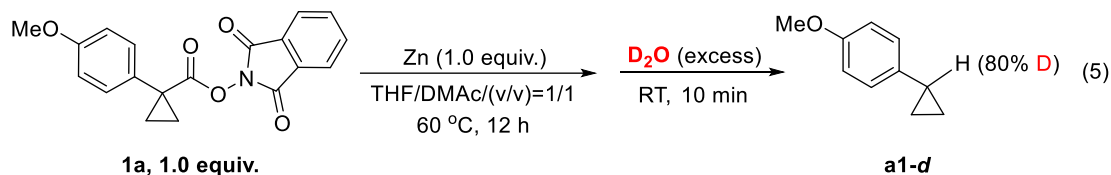

**Equation 5:** To an oven-dried screw-cap tube equipped with stir bar was charged with **1a** (0.3 mmol, 101.2 mg, 1.0 equiv) and Zn powder (0.3 mmol, 19.5 mg, 1.0 equiv). The tube was vacuumed and backfilled with argon for three cycles, then THF (0.75 mL) and DMAc (0.75 mL) were added through syringe and the tube was sealed with a teflon stopper and stirred at 60 °C for 12 hours. 12 hours later, the reaction mixture was cooled to room temperature and excess of D<sub>2</sub>O was added to the reaction solution under argon atmosphere. The mixture was stirred for further 10 minutes, then extracted with ethyl acetate. Organic layer was separated, dried over Na<sub>2</sub>SO<sub>4</sub>, concentrated under reduced pressure to give crude product, which was purified by TLC using petroleum ether/ethyl acetate = 100/1 as eluent to give deuteration compound **a1-d** as colorless oil in 61% yield.

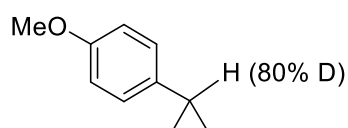

**1-(cyclopropyl-1-d)-4-methoxybenzene (a1-d).** Colorless oil.

**<sup>1</sup>H NMR (400 MHz, CDCl<sub>3</sub>)** δ 6.92 (m, 2H), 6.74 – 6.69 (m, 2H), 3.68 (s, 3H), 1.75 (m, 0.2H), 0.80 (m, 2H), 0.52 (m, 2H). **<sup>13</sup>C NMR (101 MHz, CDCl<sub>3</sub>)** δ 157.67, 135.97, 135.91, 126.93, 126.89, 113.85, 55.42, 14.71, 8.65, 8.57. **HRMS (ESI):** Exact mass calculated for C<sub>10</sub>H<sub>11</sub>DO [M+H]<sup>+</sup> 150.1029, found 150.1051.



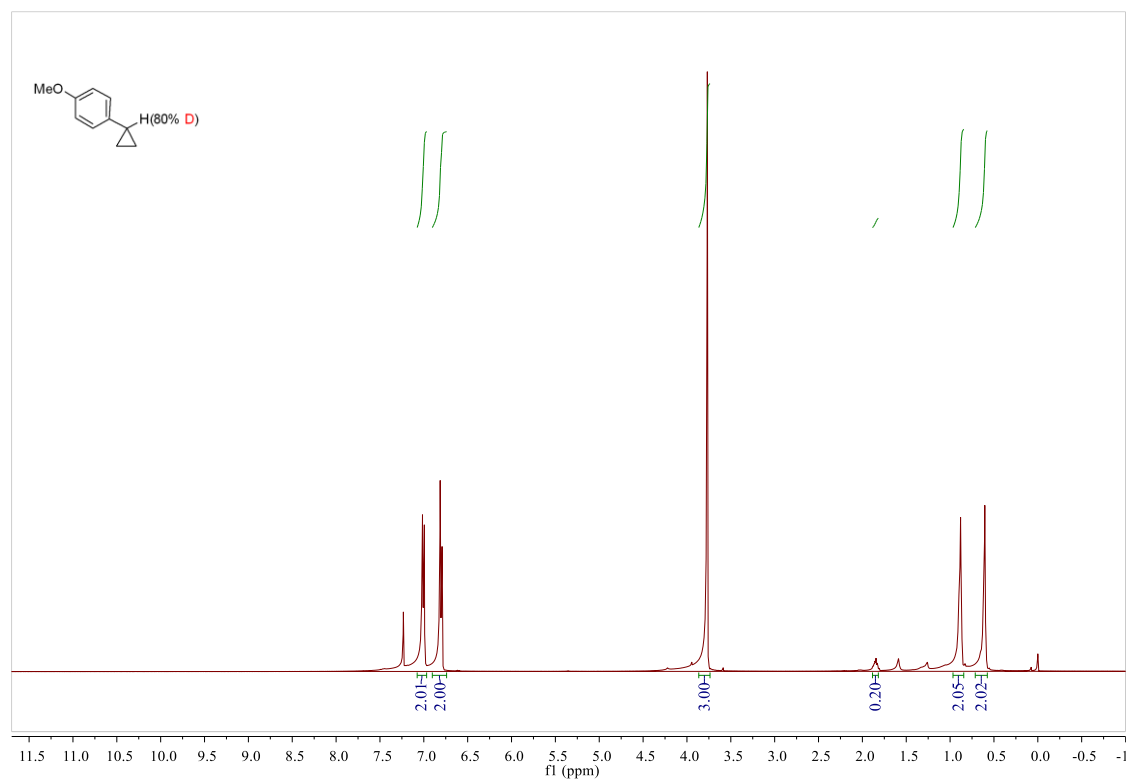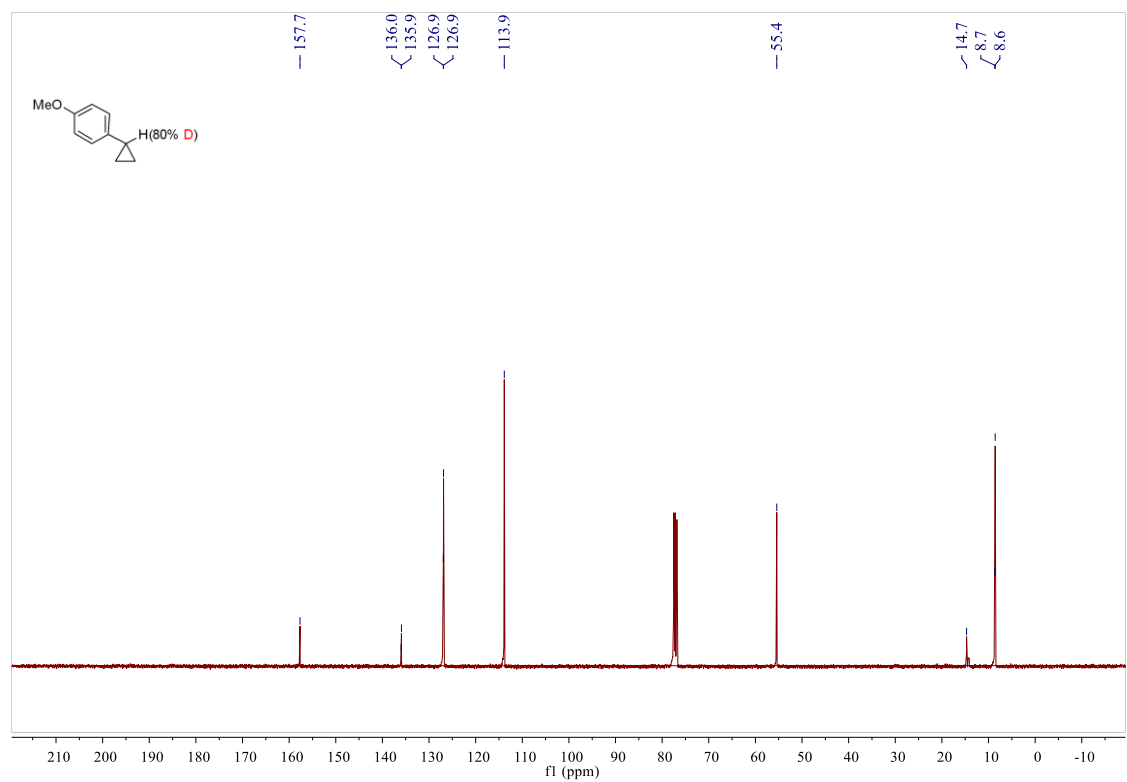

## 5. Stereospecific Cross-Coupling Reaction and Orthogonality Demonstration

### 5.1 Scheme 5. Stereospecific cross-coupling reaction

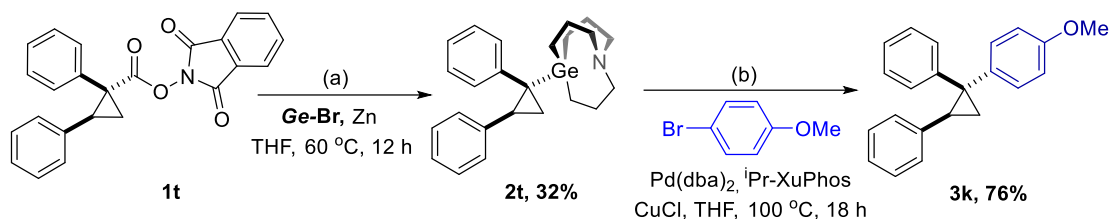

**Reaction (a):** To an oven-dried screw-cap tube equipped with stir bar was charged with **Ge-Br** (0.2 mmol, 58.4 mg, 1.0 equiv.), cis-1,3-dioxoisindolin-2-yl 1,2-diphenylcyclopropane-1-carboxylate (**1t**) (0.4 mmol, 123.6 mg, 2.0 equiv.) and Zn powder (0.4 mmol, 26 mg, 2.0 equiv.). The tube was vacuumed and backfilled with argon for three cycles, then 1.0 mL THF was added through syringe and the tube was sealed with a teflon stopper and stirred at 60 °C for 12 hours. The reaction was quenched with NH<sub>4</sub>Cl (sat, aq), extracted with ethyl acetate. Organic layer was separated, dried over Na<sub>2</sub>SO<sub>4</sub>, concentrated under reduced pressure to give crude product, which was purified by preparative TLC using petroleum ether as eluent to give **2t** in 32% yield as white solid.

**Reaction (b):** To an oven-dried screw-cap tube equipped with stir bar was added Pd(dba)<sub>2</sub> (0.01 mmol, 5.75 mg, 5 mol%), <sup>i</sup>Pr-XuPhos (0.03 mmol, 23.2 mg, 15 mol%), CuCl (0.4 mmol, 39.6 mg, 2.0 equiv.) and cis-5-(1,2-diphenylcyclopropyl)-1-aza-5-germabicyclo[3.3.3]undecane (**2t**) (0.20 mmol, 81.2 mg, 1.0 equiv.). The tube was vacuumed and backfilled with argon for three cycles, then 4-bromoanisole (0.22 mmol, 42.4 mg, 1.1 equiv) and THF (1.0 mL) were added through syringe and the screw-cap tube was sealed with a teflon stopper and heated to 100 °C for 18 hours. At the end of the reaction, the reaction mixture was cooled to room temperature and added saturated sodium chloride aqueous solution, extracted with ethyl acetate three times. Organic layer was separated, dried over Na<sub>2</sub>SO<sub>4</sub>, concentrated under reduced pressure to give crude product, which was purified by preparative TLC using petroleum ether/ethyl acetate = 50/1 as eluent to give **3k** in 76% yield as white solid.

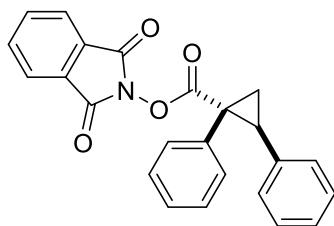

**Cis-1,3-dioxoisindolin-2-yl 1,2-diphenylcyclopropane-1-carboxylate (**1t**).** 5 mmol cis-1,2-diphenylcyclopropane-1-carboxylic acid<sup>10</sup> was applied in the general procedure A. Purified by silica gel column chromatography using petroleum ether/ethyl acetate =

5/1 as eluent to give title compound as white solid in 86% yield.

**<sup>1</sup>H NMR (400 MHz, CDCl<sub>3</sub>)** δ 7.89 – 7.84 (m, 2H), 7.80 – 7.75 (m, 2H), 7.23 – 7.15 (m, 5H), 7.10 (m, 3H), 6.89 – 6.84 (m, 2H), 3.39 (dd, *J* = 9.4, 7.8 Hz, 1H), 2.38 (dd, *J* = 9.5, 5.4 Hz, 1H), 2.19 (dd, *J* = 7.7, 5.4 Hz, 1H). **<sup>13</sup>C NMR (101 MHz, CDCl<sub>3</sub>)** δ 170.52, 162.01, 134.96, 134.83, 132.34, 132.18, 129.04, 128.39, 128.08, 127.98, 127.89, 127.04, 124.01, 35.41, 35.31, 21.84. **HRMS (ESI):** Exact mass calculated for C<sub>24</sub>H<sub>17</sub>NO<sub>4</sub> [M+H]<sup>+</sup> 384.1236, found 384.1230.

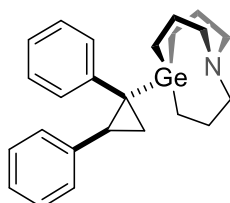

**Cis-5-(1,2-diphenylcyclopropyl)-1-aza-5-germabicyclo[3.3.3]undecane(2t).**

Synthesized according to reaction (a) to give title compound as white solid in 32% yield.

**<sup>1</sup>H NMR (400 MHz, C<sub>6</sub>D<sub>6</sub>)** δ 6.79 – 6.57 (m, 8H), 6.55 – 6.49 (m, 2H), 1.99 (m, 1H), 1.79 – 1.69 (m, 6H), 1.18 – 1.09 (m, 2H), 1.08 – 1.00 (m, 6H), 0.46 – 0.34 (m, 6H). **<sup>13</sup>C NMR (101 MHz, C<sub>6</sub>D<sub>6</sub>)** δ 144.60, 141.50, 138.65, 131.08, 129.34, 127.96, 127.72, 125.98, 125.04, 124.32, 53.59, 33.98, 26.39, 24.69, 23.83, 18.16, 11.53, 9.99. **HRMS (ESI):** Exact mass calculated for C<sub>24</sub>H<sub>17</sub>GeNO<sub>4</sub> [M+H]<sup>+</sup> 408.1747, found 408.1738.

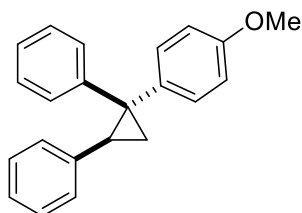

**Cis-(1-(4-methoxyphenyl)cyclopropane-1,2-diyl)dibenzene (3k).** Synthesized according to reaction (b) to give title compound as white solid in 76% yield. **3k** is a known compound, and can also be synthesized based on reported literature.<sup>11</sup>

**<sup>1</sup>H NMR (400 MHz, CDCl<sub>3</sub>)** δ 7.27 – 7.21 (m, 2H), 7.12 – 6.99 (m, 8H), 6.89 – 6.78 (m, 4H), 3.74 (s, 3H), 2.80 (dd, *J* = 8.9, 6.5 Hz, 1H), 1.92 (dd, *J* = 6.5, 5.4 Hz, 1H), 1.73 (dd, *J* = 9.0, 5.3 Hz, 1H). **<sup>13</sup>C NMR (101 MHz, CDCl<sub>3</sub>)** δ 157.91, 140.78, 139.43, 138.94, 131.01, 128.75, 128.03, 128.00, 127.73, 126.21, 125.62, 113.83, 55.39, 38.88, 32.18, 20.69. **HRMS (ESI):** Exact mass calculated for C<sub>20</sub>H<sub>19</sub>NO [M+H]<sup>+</sup> 301.1592, found 301.1588.

## 5.2 Scheme 6. Orthogonal reactivity with boron reagents

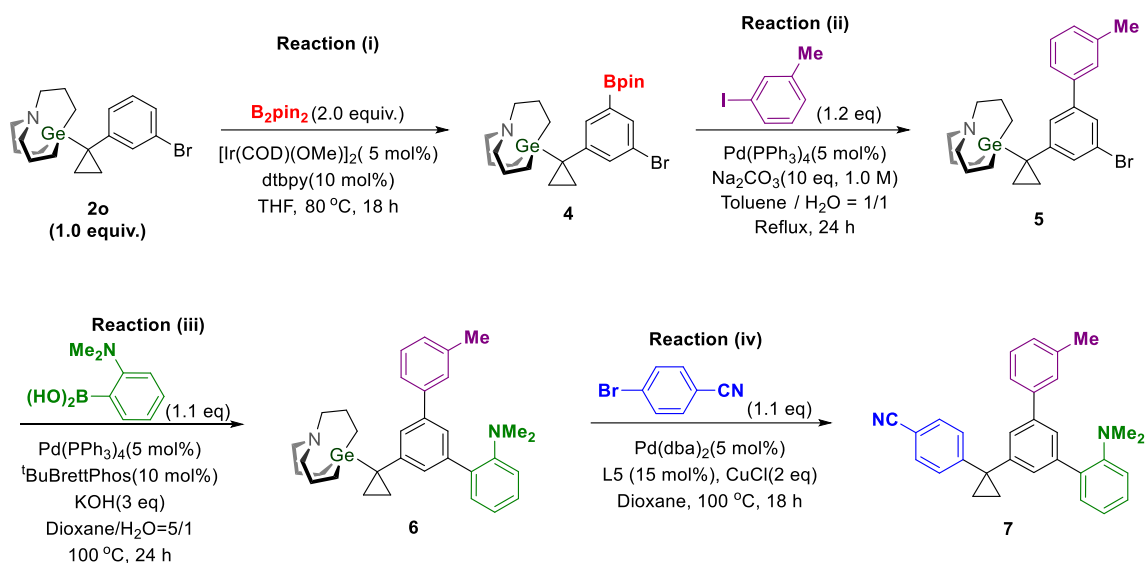

**Reaction (i) :**  $[\text{Ir}(\text{COD})(\text{OMe})_2]_2$  (0.01 mmol, 6.63 mg, 5 mol%), dtbpy (4,4'-Di-tert-butyl-2,2'-dipyridyl, 0.02 mmol, 5.4 mg, 10 mol%),  $\text{B}_2\text{pin}_2$  (0.4 mmol, 101.6 mg, 2.0 equiv.) were weighed and transferred to a screw-cap tube with stir bar. The tube was evacuated and backfilled three times with argon, then THF (1.0 mL) and 5-(1-(3-bromophenyl)cyclopropyl)-1-aza-5-germabicyclo[3.3.3]undecane (**2o**) (0.20 mmol, 81.80 mg, 1.0 equiv.) were added and the screw-cap tube was sealed with a teflon stopper and heated to 80 °C for 18 hours. At the end of the reaction, the reaction mixture was cooled to room temperature and purified by preparative TLC using petroleum ether/ethyl acetate = 50/1 as eluent to give **4** as white solid in 92% yield.

**Reaction (ii):** To an oven-dried screw-cap tube equipped with stir bar was added  $\text{Pd}(\text{PPh}_3)_4$  (0.01 mmol, 11.6 mg, 5 mol%),  $\text{Na}_2\text{CO}_3$  (2.0 mmol, 212 mg, 10.0 equiv.) and 5-(1-(3-bromo-5-(4,4,5,5-tetramethyl-1,3,2-dioxaborolan-2-yl)phenyl)cyclopropyl)-1-aza-5-germabicyclo[3.3.3]undecane (**4**) (0.2 mmol, 107 mg, 1.0 equiv.) were weighed and transferred to a screw-cap tube with stir bar. The tube was evacuated and backfilled three times with argon, then 1-iodo-3-methylbenzene (0.24 mmol, 31.4  $\mu\text{L}$ , 1.2 equiv.) was added by microsyringe, toluene (2.0 mL) and  $\text{H}_2\text{O}$  (2.0 mL) were added through syringe. Then the screw-cap tube was sealed with a teflon stopper and heated to 100 °C for 24 hours. At the end of the reaction, the reaction mixture was cooled to room temperature and extracted with ethyl acetate three times. Organic layer was separated, dried over  $\text{Na}_2\text{SO}_4$ , concentrated under reduced pressure to give crude product, which was purified by preparative TLC using petroleum ether as eluent to give **5** in 90% yield as colorless liquid.

**Reaction (iii):** To an oven-dried screw-cap tube equipped with stir bar was added  $\text{Pd}(\text{PPh}_3)_4$  (0.01 mmol, 11.6 mg, 5 mol%),  $\text{tBuBrettPhos}$  (0.02 mmol, 9.7 mg, 10 mol%),

KOH (0.6 mmol, 33.7 mg, 3.0 equiv.) and (2-(dimethylamino)phenyl)boronic acid (0.22 mmol, 36.3 mg, 1.1 equiv.). The tube was evacuated and backfilled three times with argon, then 5-(1-(5-bromo-3'-methyl-[1,1'-biphenyl]-3-yl)cyclopropyl)-1-aza-5-germabicyclo[3.3.3]undecane (**5**) (0.2 mmol, 99.8 mg, 1.0 equiv.), dioxane (1.0 mL) and H<sub>2</sub>O (0.2 mL) were added through syringe and the screw-cap tube was sealed with a teflon stopper and heated to 100 °C for 24 hours. At the end of the reaction, the reaction mixture was cooled to room temperature and extracted with ethyl acetate three times. Organic layer was separated, dried over Na<sub>2</sub>SO<sub>4</sub>, concentrated under reduced pressure to give crude product, which was purified by preparative TLC using petroleum ether/ethyl acetate = 50/1 as eluent to give **6** in 78% yield as colorless liquid.

**Reaction (iv):** To an oven-dried screw-cap tube equipped with stir bar was added Pd(dba)<sub>2</sub> (0.01 mmol, 5.75 mg, 5 mol%), <sup>i</sup>Pr-XuPhos (L<sub>6</sub>) (0.03 mmol, 23.2 mg, 15 mol%), CuCl (0.4 mmol, 39.6 mg, 2.0 equiv.) and 4-bromobenzonitrile (0.22 mmol, 40.1 mg, 1.1 equiv.). The tube was vacuumed and backfilled with argon for three cycles, then 5'-(1-(1-aza-5-germabicyclo[3.3.3]undecan-5-yl)cyclopropyl)-N,N,3"-trimethyl-[1,1':3',1"-terphenyl]-2-amine (**6**) (0.20 mmol, 108 mg, 1.0 equiv) and THF (1.0 mL) were added through syringe and the screw-cap tube was sealed with a teflon stopper and heated to 100 °C for 18 hours. At the end of the reaction, the reaction mixture was cooled to room temperature and extracted with ethyl acetate three times. Organic layer was separated, dried over Na<sub>2</sub>SO<sub>4</sub>, concentrated under reduced pressure to give crude product, which was purified by preparative TLC using petroleum ether/ethyl acetate = 20/1 as eluent to give **7** in 64% yield as white solid.

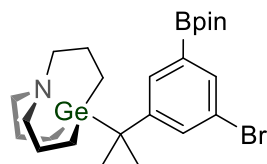

**5-(1-(3-bromo-5-(4,4,5,5-tetramethyl-1,3,2-dioxaborolan-2-yl)phenyl)cyclopropyl)-1-aza-5-germabicyclo[3.3.3]undecane (**4**).** Synthesized according to reaction (i) to give title compound as white solid in 92% yield.

<sup>1</sup>H NMR (400 MHz, C<sub>6</sub>D<sub>6</sub>) δ 7.89 (m, 1H), 7.73 (s, 1H), 7.44 (m, 1H), 1.68 (t, J = 5.8 Hz, 6H), 0.99 – 0.89 (m, 6H), 0.83 – 0.78 (m, 12H), 0.42 – 0.36 (m, 4H), 0.33 – 0.25 (t, J = 6.4 Hz, 6H). <sup>13</sup>C NMR (101 MHz, C<sub>6</sub>D<sub>6</sub>) δ 152.97, 136.24, 135.41, 134.07, 122.40, 83.94, 53.43, 24.96, 23.65, 21.74, 9.79, 9.57. <sup>11</sup>B NMR (128 MHz, C<sub>6</sub>D<sub>6</sub>) δ 30.16. HRMS (ESI): Exact mass calculated for C<sub>24</sub>H<sub>37</sub>BBrGeNO<sub>2</sub> [M+H]<sup>+</sup> 536.1391, found 536.1383.

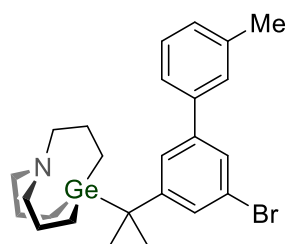

**5-(1-(5-bromo-3'-methyl-[1,1'-biphenyl]-3-yl)cyclopropyl)-1-aza-5-germabicyclo[3.3.3]undecane (5).** Synthesized according to reaction (ii) to give title compound as colorless liquid in 90% yield.

**$^1\text{H}$  NMR (400 MHz,  $\text{C}_6\text{D}_6$ )**  $\delta$  7.31 – 7.25 (m, 3H), 7.02 (m, 1H), 6.85 – 6.81 (m, 2H), 6.68 (d,  $J$  = 7.4 Hz, 1H), 1.84 (m, 3H), 1.71 – 1.64 (t,  $J$  = 5.8 Hz, 6H), 0.96 (m, 6H), 0.47 – 0.40 (m, 4H), 0.36 – 0.30 (m, 6H).  **$^{13}\text{C}$  NMR (101 MHz,  $\text{C}_6\text{D}_6$ )**  $\delta$  153.67, 153.62, 146.99, 143.91, 143.29, 143.05, 140.85, 140.77, 140.37, 138.48, 132.10, 132.02, 129.09, 129.06, 129.02, 128.75, 128.61, 128.01, 127.94, 127.88, 127.68, 127.51, 127.48, 126.62, 126.56, 124.78, 124.74, 124.10, 123.37, 122.79, 122.76, 53.47, 23.67, 22.10, 21.49, 21.45, 15.61, 9.83, 9.68, 9.48, 1.43. **HRMS (ESI):** Exact mass calculated for  $\text{C}_{25}\text{H}_{33}\text{BrGeN}$   $[\text{M}+\text{H}]^+$  500.1008, found 500.1013.

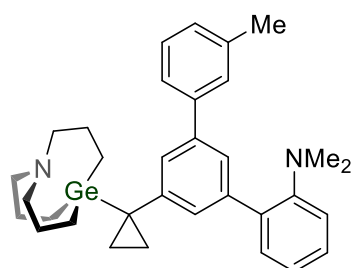

**5'-(1-(1-aza-5-germabicyclo[3.3.3]undecan-5-yl)cyclopropyl)-N,N,3''-trimethyl-[1,1':3',1''-terphenyl]-2-amine (6).** Synthesized according to reaction (iii) to give title compound as colorless liquid in 78% yield.

**$^1\text{H}$  NMR (400 MHz,  $\text{C}_6\text{D}_6$ )**  $\delta$  7.42 (m, 3H), 7.29 (s, 1H), 7.17 – 7.12 (m, 2H), 6.94 – 6.89 (m, 2H), 6.71 (m, 2H), 6.65 (m, 1H), 2.18 (m, 6H), 1.88 (m, 3H), 1.79 – 1.73 (t,  $J$  = 5.8 Hz, 6H), 1.04 (m, 6H), 0.62 – 0.59 (m, 2H), 0.54 – 0.51 (m, 2H), 0.48 – 0.40 (m, 6H).  **$^{13}\text{C}$  NMR (101 MHz,  $\text{C}_6\text{D}_6$ )**  $\delta$  151.77, 151.64, 150.71, 144.70, 143.18, 142.48, 142.34, 142.13, 142.09, 141.44, 138.30, 135.59, 132.20, 130.19, 129.04, 129.01, 128.44, 127.61, 127.55, 125.45, 125.35, 124.90, 124.02, 123.49, 122.13, 122.01, 117.97, 53.61, 43.50, 43.45, 23.91, 21.81, 21.60, 9.86, 9.68, 9.50. **HRMS (ESI):** Exact mass calculated for  $\text{C}_{33}\text{H}_{43}\text{GeN}_2$   $[\text{M}+\text{H}]^+$  541.2638, found 541.2654.

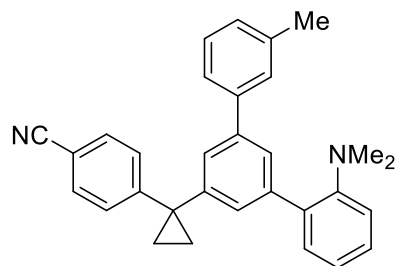

**4-(1-(2-(dimethylamino)-3''-methyl-[1,1':3',1''-terphenyl]-5'-yl)cyclopropyl)benzonitrile (7).** Synthesized according to reaction (iv) to give title compound as white solid in 64% yield.

**<sup>1</sup>H NMR (400 MHz, CDCl<sub>3</sub>)**  $\delta$  7.68 (d,  $J$  = 6.9 Hz, 1H), 7.57 – 7.50 (m, 3H), 7.42 (m, 3H), 7.34 – 7.25 (m, 5H), 7.15 (d,  $J$  = 7.4 Hz, 1H), 7.02 (m, 2H), 2.53 (s, 6H), 2.41 (s, 3H), 1.49 (m, 2H), 1.36 (m, 2H). **<sup>13</sup>C NMR (101 MHz, CDCl<sub>3</sub>)**  $\delta$  152.02, 151.94, 151.27, 144.18, 144.07, 142.70, 141.87, 141.72, 141.07, 138.47, 133.64, 132.11, 131.60, 128.95, 128.92, 128.88, 128.80, 128.44, 128.30, 128.23, 128.01, 127.49, 127.22, 126.17, 125.97, 125.92, 124.34, 121.63, 119.17, 117.85, 43.49, 30.41, 21.64, 17.45. **HRMS (ESI):** Exact mass calculated for C<sub>31</sub>H<sub>29</sub>N<sub>2</sub> [M+H]<sup>+</sup> 429.2331, found 429.2337.

### 5.3 Competitive experiment with boron reagent

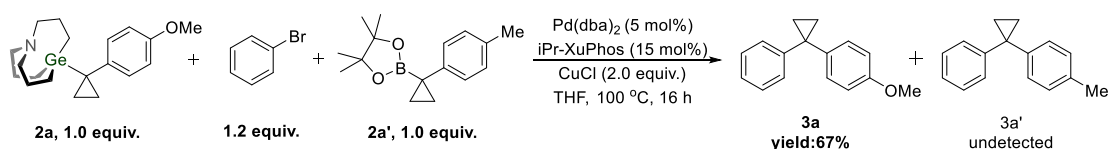

To an oven-dried screw-cap tube equipped with stir bar was added Pd(dba)<sub>2</sub> (0.01 mmol, 5.75 mg, 5 mol%), iPr-XuPhos (0.03 mmol, 23.2 mg, 15 mol%), CuCl (0.4 mmol, 39.6 mg, 2.0 equiv.) and 4,4,5,5-tetramethyl-2-(1-(p-tolyl)cyclopropyl)-1,3,2-dioxaborolane (0.20 mmol, 51.6 mg, 1.0 equiv.). The tube was vacuumed and backfilled with argon for three cycles, then 5-(1-(4-methoxyphenyl)cyclopropyl)-1-aza-5-germabicyclo[3.3.3]undecane (**2a**) (0.20 mmol, 72 mg, 1.0 equiv.), bromobenzene (0.24 mmol, 25.4  $\mu$ L, 1.2 equiv.) and THF (1.0 mL) were added through syringe and the screw-cap tube was sealed with a teflon stopper and heated to 100 °C for 16 hours. At the end of the reaction, the reaction mixture was cooled to room temperature and added saturated sodium chloride aqueous solution, extracted with ethyl acetate three times. Organic layer was separated, dried over Na<sub>2</sub>SO<sub>4</sub>, concentrated under reduced pressure to give crude product, which was purified by preparative TLC using petroleum ether/ethyl acetate = 100/1 as eluent to give **3a** in 67% yield as colorless oil.

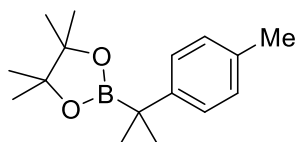

**4,4,5,5-tetramethyl-2-(1-(p-tolyl)cyclopropyl)-1,3,2-dioxaborolane (2a').**

Synthesized based on reported literature<sup>[12]</sup>, purified by preparative TLC using petroleum ether/ethyl acetate = 50/1 as eluent to give title compound as white solid in 69% yield.

**<sup>1</sup>H NMR (400 MHz, CDCl<sub>3</sub>)**  $\delta$  7.15 (d,  $J$  = 8.0 Hz, 2H), 7.04 (d,  $J$  = 8.0 Hz, 2H), 2.29 (s, 3H), 1.21 (s, 12H), 1.10 – 1.04 (m, 2H), 0.90 – 0.85 (m, 2H). **<sup>13</sup>C NMR (101 MHz, CDCl<sub>3</sub>)**  $\delta$  172.28, 162.28, 134.79, 129.18, 124.02, 23.68, 14.99, 10.90, 3.09. **<sup>11</sup>B NMR (128 MHz, CDCl<sub>3</sub>)**  $\delta$  33.84. **HRMS (ESI):** Exact mass calculated for C<sub>16</sub>H<sub>23</sub>BO<sub>2</sub> [M+Na]<sup>+</sup> 281.1689, found 281.1688.



---

## 6. Reference

- [1] Meng-Yu Xu, Wei-Tao Jiang, Ying Li, Qing-Hao Xu, Qiao-Lan Zhou, Shuo Yang, and Bin Xiao. Alkyl Carbagermatranes Enable Practical Palladium-Catalyzed  $\text{sp}^2\text{-sp}^3$  Cross-Coupling. *J. Am. Chem. Soc.* **2019**, *141*, 7582-7588.
- [2] R. Mao, J. Balon, X. Hu. Decarboxylative  $\text{C}(\text{sp}^3)\text{-O}$  Cross-Coupling. *Angew. Chem. Int. Ed.* **2018**, *57*, 13624-13628.
- [3] T. Qin, L. R. Malins, J. T. Edwards, R. R. Merchant, A. J. E. Novak, J. Z. Zhong, R. B. Mills, M. Yan, C. Yuan, M. D. Eastgate, P. S. Baran. Nickel-Catalyzed Barton Decarboxylation and Giese Reactions: A Practical Take on Classic Transforms. *Angew. Chem. Int. Ed.* **2017**, *56*, 260-265.
- [4] Fumihiko Toriyama, Josep Cornella, Laurin Wimmer, Tie-Gen Chen, Darryl D. Dixon, Gardner Creech, and Phil S. Baran. Redox-Active Esters in Fe-Catalyzed C–C Coupling. *J. Am. Chem. Soc.* **2016**, *138*, 35, 11132–11135.
- [5] Mndzhoyan, Sh. L.; Tsinker, M. G.; Ovakimyan, A. R.; Ter-Zakhayan, Yu. Z.; Kazarayan, E. V.; Paronikyan, R. V. Semisynthetic Penicillins. *Pharmaceutical Chemistry Journal*, **1980**, *14*, 2, 114 - 118.
- [6] Taegyo Lee, John F. Hartwig. Rhodium-Catalyzed Enantioselective Silylation of Cyclopropyl C–H Bonds. *Angew. Chem. Int. Ed.* **2016**, *55*, 8723-8727.
- [7] Fabio M. Sabbatini, Romano Di Fabio, Cristiana Griffante, Giorgio Pentassuglia, Laura Zonzini, Sergio Melotto, Giuseppe Alvaro, Anna M. Capelli, Lara Pippo, Elisabetta Perdonà, Yves St. Denis, Silvano Costa, Mauro Corsi. Synthesis and pharmacological characterization of constrained analogues of Vestipitant as in vitro potent and orally active  $\text{NK}_1$  receptor antagonists. *Bioorganic & Medicinal Chemistry Letters*, **2010**, *20*, 2, 623-627.
- [8] Yongjia Shi, Qian Gao, and Senmiao Xu. Chiral Bidentate Boryl Ligand Enabled Iridium-Catalyzed Enantioselective  $\text{C}(\text{sp}^3)\text{-H}$  Borylation of Cyclopropanes. *J. Am. Chem. Soc.* **2019**, *141*, 27, 10599–10604.
- [9] a) L. Reginald Mills, John J. Monteith, Gabriel dos Passos Gomes, Alan Aspuru-Guzik, and Sophie A. L. Rousseaux. The Cyclopropane Ring as a Reporter of Radical Leaving-Group Reactivity for Ni-Catalyzed  $\text{C}(\text{sp}^3)\text{-O}$  Arylation. *J. Am. Chem. Soc.* **2020**, *142*, 30, 13246–13254. b) Tie-Gen Chen, Haolin Zhang, Pavel K. Mykhailiuk, Rohan R. Merchant, Courtney A. Smith, Tian Qin, and Phil S. Baran. Quaternary Centers by Nickel-Catalyzed Cross-Coupling of Tertiary Carboxylic Acids and (Hetero)Aryl Zinc Reagents. *Angew. Chem. Int. Ed.* **2019**, *58*, 2454-2458.
- [10] Paola Vianello, Oronza A. Botrugno, Anna Cappa, Giuseppe Ciossani, Paola Dessanti, Antonello Mai, Andrea Mattevi, Giuseppe Meroni, Saverio Minucci, Florian Thaler, Marcello Tortorici, Paolo Trifiro, Sergio Valente, Manuela Villa, Mario Varasi, Ciro Mercurio. Synthesis, biological activity and mechanistic insights of 1-substituted cyclopropylamine derivatives: A novel class of irreversible inhibitors of histone demethylase KDM1A. *Eur. J. Med. Chem.* **2014**, *86*, 352-363.
- [11] G. R. Bedford, A. L. Walpole, and B. Wright. Estrogenic Triarylcyclopropanes. *J. Med. Chem.* **1974**, *17*, 1, 147–149.
- [12] J. Wang, M. Shang, H. Lundberg, K. S. Feu, S. J. Hecker, T. Qin, D. G. Blackmond and P. S. Baran. Cu-Catalyzed Decarboxylative Borylation. *ACS Catal.* **2018**, *8*, 9537-9542.

## 7. X-Ray Crystallographic Data and NMR Spectra

### 7.1 X-ray crystallographic data of 2t and 3k

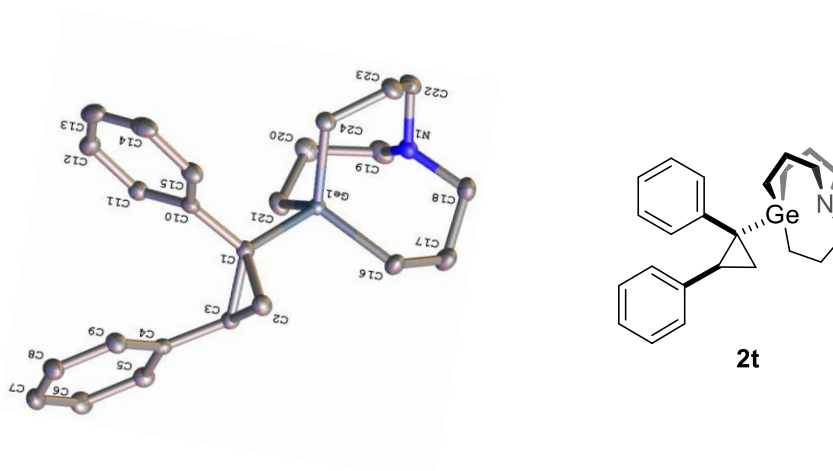

Figure S1. X-ray structure of compound 2t

Table S1. Crystal data and structure refinement for C<sub>24</sub>H<sub>31</sub>GeN (2t)

|                                  |                                                                                                              |
|----------------------------------|--------------------------------------------------------------------------------------------------------------|
| Identification code              | C24 H31 Ge N                                                                                                 |
| Empirical formula                | C <sub>24</sub> H <sub>31</sub> Ge N                                                                         |
| Formula weight                   | 406.09                                                                                                       |
| Temperature                      | 173.0 K                                                                                                      |
| Wavelength                       | 1.34139 Å                                                                                                    |
| Crystal system                   | Monoclinic                                                                                                   |
| Space group                      | P 1 21/c 1                                                                                                   |
| Unit cell dimensions             | a = 15.7360(11) Å      α = 90 °<br>b = 10.2256(7) Å      β = 117.508(3) °<br>c = 14.5955(11) Å      γ = 90 ° |
| Volume                           | 2083.0(3) Å <sup>3</sup>                                                                                     |
| Z                                | 4                                                                                                            |
| Density (calculated)             | 1.295 Mg/m <sup>3</sup>                                                                                      |
| Absorption coefficient           | 1.381 mm <sup>-1</sup>                                                                                       |
| F(000)                           | 856                                                                                                          |
| Crystal size                     | 0.1 x 0.06 x 0.05 mm <sup>3</sup>                                                                            |
| Theta range for data collection  | 4.795 to 54.931 °                                                                                            |
| Index ranges                     | -19<=h<=19, -12<=k<=12, -17<=l<=14                                                                           |
| Reflections collected            | 20026                                                                                                        |
| Independent reflections          | 3925 [R(int) = 0.0625]                                                                                       |
| Completeness to theta = 53.594 ° | 99.1 %                                                                                                       |
| Absorption correction            | Semi-empirical from equivalents                                                                              |
| Max. and min. transmission       | 0.7508 and 0.5062                                                                                            |
| Refinement method                | Full-matrix least-squares on F <sup>2</sup>                                                                  |

---

|                                      |                                       |
|--------------------------------------|---------------------------------------|
| Data / restraints / parameters       | 3925 / 0 / 235                        |
| Goodness-of-fit on $F^2$             | 1.069                                 |
| Final R indices [ $I > 2\sigma(I)$ ] | $R1 = 0.0411$ , $wR2 = 0.1135$        |
| R indices (all data)                 | $R1 = 0.0441$ , $wR2 = 0.1175$        |
| Extinction coefficient               | n/a                                   |
| Largest diff. peak and hole          | 0.776 and -1.008 e. $\text{\AA}^{-3}$ |

---

**Experimental.** Single colourless prism-shaped crystals of 2t were recrystallized from  $\text{CH}_3\text{CN}$  by saturated solution at r.t.

**Table S2. Atomic coordinates ( $\times 10^4$ ) and equivalent isotropic displacement parameters ( $\text{\AA}^2 \times 10^3$ ) for 2t.**  $U(\text{eq})$  is defined as one third of the trace of the orthogonalized  $U_{ij}$  tensor.

| Atom  | x       | y        | z       | $U(\text{eq})$ |
|-------|---------|----------|---------|----------------|
| Ge(1) | 8096(1) | 5957(1)  | 7021(1) | 25(1)          |
| N(1)  | 8311(1) | 3531(2)  | 6644(1) | 32(1)          |
| C(1)  | 7894(1) | 7831(2)  | 7290(2) | 27(1)          |
| C(2)  | 8602(2) | 8487(2)  | 8272(2) | 32(1)          |
| C(3)  | 7643(1) | 8062(2)  | 8171(2) | 27(1)          |
| C(4)  | 6911(1) | 9020(2)  | 8120(2) | 27(1)          |
| C(5)  | 6189(2) | 8589(2)  | 8342(2) | 33(1)          |
| C(6)  | 5487(2) | 9432(3)  | 8309(2) | 41(1)          |
| C(7)  | 5495(2) | 10734(2) | 8057(2) | 41(1)          |
| C(8)  | 6205(2) | 11180(2) | 7837(2) | 40(1)          |
| C(9)  | 6907(2) | 10330(2) | 7867(2) | 34(1)          |
| C(10) | 7433(2) | 8645(2)  | 6327(2) | 28(1)          |
| C(11) | 6442(2) | 8685(2)  | 5720(2) | 35(1)          |
| C(12) | 6033(2) | 9385(3)  | 4794(2) | 46(1)          |
| C(13) | 6606(2) | 10033(2) | 4459(2) | 51(1)          |
| C(14) | 7584(2) | 10004(2) | 5052(2) | 47(1)          |
| C(15) | 7994(2) | 9324(2)  | 5980(2) | 37(1)          |
| C(16) | 9104(2) | 5309(2)  | 8366(2) | 39(1)          |
| C(17) | 9098(2) | 3828(2)  | 8513(2) | 48(1)          |
| C(18) | 9105(2) | 3085(2)  | 7614(2) | 43(1)          |
| C(19) | 7382(2) | 2962(2)  | 6408(2) | 41(1)          |
| C(20) | 6604(2) | 3991(2)  | 5906(2) | 39(1)          |
| C(21) | 6813(2) | 5198(2)  | 6590(2) | 35(1)          |
| C(22) | 8527(2) | 3625(2)  | 5779(2) | 37(1)          |

---

|       |         |         |         |       |
|-------|---------|---------|---------|-------|
| C(23) | 9053(2) | 4903(2) | 5853(2) | 37(1) |
| C(24) | 8489(2) | 6076(2) | 5929(2) | 31(1) |

---

**Table S3. Bond lengths [Å] for 2t**

---

|             |            |              |          |
|-------------|------------|--------------|----------|
| Ge(1)-C(1)  | 2.0110(19) | C(12)-C(13)  | 1.378(4) |
| Ge(1)-C(16) | 1.982(2)   | C(13)-H(13)  | 0.9500   |
| Ge(1)-C(21) | 1.975(2)   | C(13)-C(14)  | 1.374(4) |
| Ge(1)-C(24) | 1.962(2)   | C(14)-H(14)  | 0.9500   |
| N(1)-C(18)  | 1.463(3)   | C(14)-C(15)  | 1.388(3) |
| N(1)-C(19)  | 1.459(3)   | C(15)-H(15)  | 0.9500   |
| N(1)-C(22)  | 1.454(3)   | C(16)-H(16A) | 0.9900   |
| C(1)-C(2)   | 1.506(3)   | C(16)-H(16B) | 0.9900   |
| C(1)-C(3)   | 1.528(3)   | C(16)-C(17)  | 1.531(3) |
| C(1)-C(10)  | 1.500(3)   | C(17)-H(17A) | 0.9900   |
| C(2)-H(2A)  | 0.9900     | C(17)-H(17B) | 0.9900   |
| C(2)-H(2B)  | 0.9900     | C(17)-C(18)  | 1.520(4) |
| C(2)-C(3)   | 1.511(3)   | C(18)-H(18A) | 0.9900   |
| C(3)-H(3)   | 1.0000     | C(18)-H(18B) | 0.9900   |
| C(3)-C(4)   | 1.487(3)   | C(19)-H(19A) | 0.9900   |
| C(4)-C(5)   | 1.390(3)   | C(19)-H(19B) | 0.9900   |
| C(4)-C(9)   | 1.389(3)   | C(19)-C(20)  | 1.521(3) |
| C(5)-H(5)   | 0.9500     | C(20)-H(20A) | 0.9900   |
| C(5)-C(6)   | 1.385(3)   | C(20)-H(20B) | 0.9900   |
| C(6)-H(6)   | 0.9500     | C(20)-C(21)  | 1.524(3) |
| C(6)-C(7)   | 1.383(4)   | C(21)-H(21A) | 0.9900   |
| C(7)-H(7)   | 0.9500     | C(21)-H(21B) | 0.9900   |
| C(7)-C(8)   | 1.374(4)   | C(22)-H(22A) | 0.9900   |
| C(8)-H(8)   | 0.9500     | C(22)-H(22B) | 0.9900   |
| C(8)-C(9)   | 1.391(3)   | C(22)-C(23)  | 1.524(3) |
| C(9)-H(9)   | 0.9500     | C(23)-H(23A) | 0.9900   |
| C(10)-C(11) | 1.394(3)   | C(23)-H(23B) | 0.9900   |
| C(10)-C(15) | 1.391(3)   | C(23)-C(24)  | 1.527(3) |
| C(11)-H(11) | 0.9500     | C(24)-H(24A) | 0.9900   |
| C(11)-C(12) | 1.397(3)   | C(24)-H(24B) | 0.9900   |
| C(12)-H(12) | 0.9500     |              |          |

---

**Table S4. Bond angles [°] for 2t**

|                   |            |                     |            |
|-------------------|------------|---------------------|------------|
| C(16)-Ge(1)-C(1)  | 104.58(9)  | C(8)-C(7)-C(6)      | 119.4(2)   |
| C(21)-Ge(1)-C(1)  | 101.91(8)  | C(8)-C(7)-H(7)      | 120.3      |
| C(21)-Ge(1)-C(16) | 114.69(10) | C(7)-C(8)-H(8)      | 119.8      |
| C(24)-Ge(1)-C(1)  | 103.67(8)  | C(7)-C(8)-C(9)      | 120.3(2)   |
| C(24)-Ge(1)-C(16) | 114.63(10) | C(9)-C(8)-H(8)      | 119.8      |
| C(24)-Ge(1)-C(21) | 115.11(10) | C(4)-C(9)-C(8)      | 121.1(2)   |
| C(19)-N(1)-C(18)  | 114.8(2)   | C(4)-C(9)-H(9)      | 119.4      |
| C(22)-N(1)-C(18)  | 115.10(18) | C(8)-C(9)-H(9)      | 119.4      |
| C(22)-N(1)-C(19)  | 115.55(19) | C(11)-C(10)-C(1)    | 121.81(19) |
| C(2)-C(1)-Ge(1)   | 119.73(14) | C(15)-C(10)-C(1)    | 120.28(19) |
| C(2)-C(1)-C(3)    | 59.71(13)  | C(15)-C(10)-C(11)   | 117.8(2)   |
| C(3)-C(1)-Ge(1)   | 115.88(13) | C(10)-C(11)-H(11)   | 119.7      |
| C(10)-C(1)-Ge(1)  | 113.43(14) | C(10)-C(11)-C(12)   | 120.7(2)   |
| C(10)-C(1)-C(2)   | 118.00(17) | C(12)-C(11)-H(11)   | 119.7      |
| C(10)-C(1)-C(3)   | 120.09(16) | C(11)-C(12)-H(12)   | 119.8      |
| C(1)-C(2)-H(2A)   | 117.7      | C(13)-C(12)-C(11)   | 120.4(3)   |
| C(1)-C(2)-H(2B)   | 117.7      | C(13)-C(12)-H(12)   | 119.8      |
| C(1)-C(2)-C(3)    | 60.87(13)  | C(12)-C(13)-H(13)   | 120.3      |
| H(2A)-C(2)-H(2B)  | 114.8      | C(14)-C(13)-C(12)   | 119.5(2)   |
| C(3)-C(2)-H(2A)   | 117.7      | C(14)-C(13)-H(13)   | 120.3      |
| C(3)-C(2)-H(2B)   | 117.7      | C(13)-C(14)-H(14)   | 119.8      |
| C(1)-C(3)-H(3)    | 113.7      | C(13)-C(14)-C(15)   | 120.4(2)   |
| C(2)-C(3)-C(1)    | 59.42(13)  | C(15)-C(14)-H(14)   | 119.8      |
| C(2)-C(3)-H(3)    | 113.7      | C(10)-C(15)-H(15)   | 119.4      |
| C(4)-C(3)-C(1)    | 123.68(17) | C(14)-C(15)-C(10)   | 121.2(2)   |
| C(4)-C(3)-C(2)    | 122.02(17) | C(14)-C(15)-H(15)   | 119.4      |
| C(4)-C(3)-H(3)    | 113.7      | Ge(1)-C(16)-H(16A)  | 108.6      |
| C(5)-C(4)-C(3)    | 118.47(18) | Ge(1)-C(16)-H(16B)  | 108.6      |
| C(9)-C(4)-C(3)    | 123.88(19) | H(16A)-C(16)-H(16B) | 107.6      |
| C(9)-C(4)-C(5)    | 117.66(19) | C(17)-C(16)-Ge(1)   | 114.54(17) |
| C(4)-C(5)-H(5)    | 119.3      | C(17)-C(16)-H(16A)  | 108.6      |
| C(6)-C(5)-C(4)    | 121.3(2)   | C(17)-C(16)-H(16B)  | 108.6      |
| C(6)-C(5)-H(5)    | 119.3      | C(16)-C(17)-H(17A)  | 109.3      |
| C(5)-C(6)-H(6)    | 119.9      | C(16)-C(17)-H(17B)  | 109.3      |
| C(7)-C(6)-C(5)    | 120.2(2)   | H(17A)-C(17)-H(17B) | 107.9      |
| C(7)-C(6)-H(6)    | 119.9      | C(18)-C(17)-C(16)   | 111.7(2)   |
| C(6)-C(7)-H(7)    | 120.3      | C(18)-C(17)-H(17A)  | 109.3      |

|                     |            |                     |            |
|---------------------|------------|---------------------|------------|
| C(18)-C(17)-H(17B)  | 109.3      | C(20)-C(21)-H(21A)  | 108.8      |
| N(1)-C(18)-C(17)    | 109.68(19) | C(20)-C(21)-H(21B)  | 108.8      |
| N(1)-C(18)-H(18A)   | 109.7      | H(21A)-C(21)-H(21B) | 107.7      |
| N(1)-C(18)-H(18B)   | 109.7      | N(1)-C(22)-H(22A)   | 109.8      |
| C(17)-C(18)-H(18A)  | 109.7      | N(1)-C(22)-H(22B)   | 109.8      |
| C(17)-C(18)-H(18B)  | 109.7      | N(1)-C(22)-C(23)    | 109.38(18) |
| H(18A)-C(18)-H(18B) | 108.2      | H(22A)-C(22)-H(22B) | 108.2      |
| N(1)-C(19)-H(19A)   | 109.8      | C(23)-C(22)-H(22A)  | 109.8      |
| N(1)-C(19)-H(19B)   | 109.8      | C(23)-C(22)-H(22B)  | 109.8      |
| N(1)-C(19)-C(20)    | 109.50(19) | C(22)-C(23)-H(23A)  | 109.4      |
| H(19A)-C(19)-H(19B) | 108.2      | C(22)-C(23)-H(23B)  | 109.4      |
| C(20)-C(19)-H(19A)  | 109.8      | C(22)-C(23)-C(24)   | 111.36(18) |
| C(20)-C(19)-H(19B)  | 109.8      | H(23A)-C(23)-H(23B) | 108.0      |
| C(19)-C(20)-H(20A)  | 109.4      | C(24)-C(23)-H(23A)  | 109.4      |
| C(19)-C(20)-H(20B)  | 109.4      | C(24)-C(23)-H(23B)  | 109.4      |
| C(19)-C(20)-C(21)   | 111.3(2)   | Ge(1)-C(24)-H(24A)  | 108.5      |
| H(20A)-C(20)-H(20B) | 108.0      | Ge(1)-C(24)-H(24B)  | 108.5      |
| C(21)-C(20)-H(20A)  | 109.4      | C(23)-C(24)-Ge(1)   | 114.94(15) |
| C(21)-C(20)-H(20B)  | 109.4      | C(23)-C(24)-H(24A)  | 108.5      |
| Ge(1)-C(21)-H(21A)  | 108.8      | C(23)-C(24)-H(24B)  | 108.5      |
| Ge(1)-C(21)-H(21B)  | 108.8      | H(24A)-C(24)-H(24B) | 107.5      |
| C(20)-C(21)-Ge(1)   | 113.95(15) |                     |            |

**Table S5. Anisotropic displacement parameters ( $\text{\AA}^2 \times 10^3$ ) for 2t.** The anisotropic displacement factor exponent takes the form:  $-2\pi^2 [h^2 a^{*2} U^{11} + \dots + 2hka^* b^* U^{12}]$

|       | $U^{11}$ | $U^{22}$ | $U^{33}$ | $U^{23}$ | $U^{13}$ | $U^{12}$ |
|-------|----------|----------|----------|----------|----------|----------|
| Ge(1) | 25(1)    | 25(1)    | 25(1)    | 1(1)     | 12(1)    | 3(1)     |
| N(1)  | 36(1)    | 30(1)    | 34(1)    | 1(1)     | 18(1)    | 5(1)     |
| C(1)  | 26(1)    | 26(1)    | 29(1)    | 0(1)     | 14(1)    | 1(1)     |
| C(2)  | 29(1)    | 31(1)    | 35(1)    | -2(1)    | 14(1)    | 0(1)     |
| C(3)  | 30(1)    | 25(1)    | 25(1)    | 1(1)     | 13(1)    | 0(1)     |
| C(4)  | 29(1)    | 29(1)    | 22(1)    | -2(1)    | 11(1)    | -1(1)    |
| C(5)  | 34(1)    | 32(1)    | 33(1)    | 0(1)     | 16(1)    | -3(1)    |
| C(6)  | 29(1)    | 55(1)    | 42(1)    | 0(1)     | 19(1)    | 2(1)     |
| C(7)  | 36(1)    | 50(1)    | 37(1)    | 2(1)     | 17(1)    | 14(1)    |

---

|       |       |       |       |       |       |       |
|-------|-------|-------|-------|-------|-------|-------|
| C(8)  | 52(1) | 33(1) | 40(1) | 5(1)  | 26(1) | 9(1)  |
| C(9)  | 40(1) | 31(1) | 38(1) | 3(1)  | 24(1) | 2(1)  |
| C(10) | 37(1) | 24(1) | 28(1) | -2(1) | 18(1) | 4(1)  |
| C(11) | 39(1) | 34(1) | 32(1) | 0(1)  | 17(1) | 6(1)  |
| C(12) | 56(2) | 42(1) | 31(1) | -3(1) | 12(1) | 15(1) |
| C(13) | 88(2) | 34(1) | 32(1) | 5(1)  | 28(1) | 15(1) |
| C(14) | 81(2) | 30(1) | 48(2) | 3(1)  | 45(2) | 2(1)  |
| C(15) | 48(1) | 28(1) | 44(1) | 3(1)  | 30(1) | 3(1)  |
| C(16) | 44(1) | 36(1) | 26(1) | 2(1)  | 8(1)  | 9(1)  |
| C(17) | 63(2) | 40(1) | 34(1) | 8(1)  | 15(1) | 14(1) |
| C(18) | 49(1) | 33(1) | 43(1) | 7(1)  | 18(1) | 14(1) |
| C(19) | 50(1) | 28(1) | 54(2) | -6(1) | 32(1) | -5(1) |
| C(20) | 32(1) | 38(1) | 49(2) | 8(1)  | 21(1) | -7(1) |
| C(21) | 32(1) | 31(1) | 47(1) | -1(1) | 22(1) | 0(1)  |
| C(22) | 43(1) | 36(1) | 39(1) | -3(1) | 24(1) | 5(1)  |
| C(23) | 37(1) | 42(1) | 42(1) | 1(1)  | 27(1) | 4(1)  |
| C(24) | 33(1) | 32(1) | 33(1) | 1(1)  | 19(1) | 1(1)  |

---

**Table S6. Hydrogen coordinates ( $\times 10^4$ ) and isotropic displacement parameters ( $\text{\AA}^2 \times 10^3$ ) for 2t.**

---

|        | <b>x</b> | <b>y</b> | <b>z</b> | <b>U(eq)</b> |
|--------|----------|----------|----------|--------------|
| H(2A)  | 8712     | 9436     | 8244     | 38           |
| H(2B)  | 9174     | 7981     | 8743     | 38           |
| H(3)   | 7675     | 7254     | 8572     | 32           |
| H(5)   | 6177     | 7698     | 8521     | 39           |
| H(6)   | 4997     | 9114     | 8459     | 49           |
| H(7)   | 5016     | 11315    | 8037     | 49           |
| H(8)   | 6215     | 12073    | 7663     | 48           |
| H(9)   | 7393     | 10652    | 7711     | 41           |
| H(11)  | 6040     | 8232     | 5939     | 42           |
| H(12)  | 5356     | 9415     | 4393     | 55           |
| H(13)  | 6327     | 10496    | 3823     | 61           |
| H(14)  | 7982     | 10453    | 4826     | 56           |
| H(15)  | 8671     | 9323     | 6385     | 44           |
| H(16A) | 9738     | 5566     | 8434     | 47           |
| H(16B) | 9026     | 5746     | 8927     | 47           |
| H(17A) | 9668     | 3576     | 9160     | 58           |
| H(17B) | 8521     | 3583     | 8579     | 58           |

---

|        |      |      |      |    |
|--------|------|------|------|----|
| H(18A) | 9720 | 3235 | 7600 | 51 |
| H(18B) | 9041 | 2136 | 7701 | 51 |
| H(19A) | 7388 | 2642 | 7051 | 49 |
| H(19B) | 7250 | 2210 | 5934 | 49 |
| H(20A) | 5979 | 3617 | 5777 | 47 |
| H(20B) | 6562 | 4248 | 5232 | 47 |
| H(21A) | 6752 | 4961 | 7215 | 42 |
| H(21B) | 6324 | 5872 | 6212 | 42 |
| H(22A) | 7925 | 3596 | 5120 | 44 |
| H(22B) | 8931 | 2876 | 5791 | 44 |
| H(23A) | 9154 | 4999 | 5235 | 45 |
| H(23B) | 9689 | 4879 | 6469 | 45 |
| H(24A) | 7908 | 6184 | 5257 | 37 |
| H(24B) | 8885 | 6871 | 6048 | 37 |

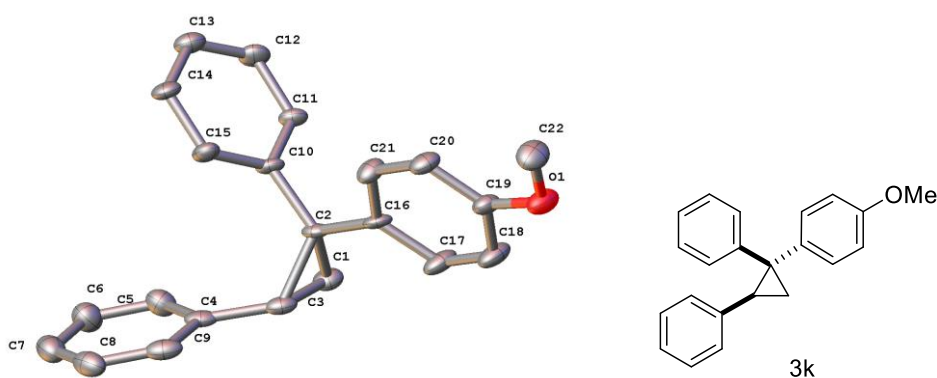

**Figure S2. X-ray structure of compound 3k**

**Table S7. Crystal data and structure refinement for C<sub>22</sub>H<sub>20</sub>O (3k)**

|                      |                        |                     |
|----------------------|------------------------|---------------------|
| Identification code  | C22 H20 O              |                     |
| Empirical formula    | C22 H20 O              |                     |
| Formula weight       | 300.38                 |                     |
| Temperature          | 173.0 K                |                     |
| Wavelength           | 1.34139 Å              |                     |
| Crystal system       | Orthorhombic           |                     |
| Space group          | Pbca                   |                     |
| Unit cell dimensions | a = 32.854(6) Å        | $\alpha = 90^\circ$ |
|                      | b = 5.8699(12) Å       | $\beta = 90^\circ$  |
|                      | c = 34.286(6) Å        | $\gamma = 90^\circ$ |
| Volume               | 6612(2) Å <sup>3</sup> |                     |



|                                   |                                             |
|-----------------------------------|---------------------------------------------|
| Z                                 | 16                                          |
| Density (calculated)              | 1.207 Mg/m <sup>3</sup>                     |
| Absorption coefficient            | 0.357 mm <sup>-1</sup>                      |
| F(000)                            | 2560                                        |
| Crystal size                      | 0.05 x 0.01 x 0.01 mm <sup>3</sup>          |
| Theta range for data collection   | 3.242 to 55.052 °                           |
| Index ranges                      | -39<=h<=24, -7<=k<=3, -41<=l<=34            |
| Reflections collected             | 21701                                       |
| Independent reflections           | 6044 [R(int) = 0.1322]                      |
| Completeness to theta = 53.594 °  | 96.0 %                                      |
| Absorption correction             | Semi-empirical from equivalents             |
| Max. and min. transmission        | 0.7508 and 0.1560                           |
| Refinement method                 | Full-matrix least-squares on F <sup>2</sup> |
| Data / restraints / parameters    | 6044 / 0 / 417                              |
| Goodness-of-fit on F <sup>2</sup> | 0.977                                       |
| Final R indices [I>2sigma(I)]     | R1 = 0.1063, wR2 = 0.2407                   |
| R indices (all data)              | R1 = 0.2265, wR2 = 0.3178                   |
| Extinction coefficient            | n/a                                         |
| Largest diff. peak and hole       | 0.367 and -0.337 e.Å <sup>-3</sup>          |

**Experimental.** Single colourless prism-shaped crystals of 3k were recrystallized from petroleum ether by saturated solution at rt.

**Table S8. Atomic coordinates (x10<sup>4</sup>) and equivalent isotropic displacement parameters (Å<sup>2</sup>x10<sup>3</sup>) for 3k.** U(eq) is defined as one third of the trace of the orthogonalized U<sup>ij</sup> tensor.

|      | <b>x</b> | <b>y</b> | <b>z</b> | <b>U(eq)</b> |
|------|----------|----------|----------|--------------|
| O(1) | 4474(1)  | 333(8)   | 6766(1)  | 57(1)        |
| C(1) | 4369(2)  | 6597(9)  | 5191(2)  | 43(2)        |
| C(2) | 4136(2)  | 4475(8)  | 5303(2)  | 32(1)        |
| C(3) | 4494(2)  | 4348(8)  | 5012(2)  | 39(1)        |
| C(4) | 4444(2)  | 3817(9)  | 4590(2)  | 40(1)        |
| C(5) | 4249(2)  | 5265(10) | 4329(2)  | 52(2)        |
| C(6) | 4217(2)  | 4735(12) | 3939(2)  | 60(2)        |
| C(7) | 4385(2)  | 2697(12) | 3798(2)  | 58(2)        |
| C(8) | 4572(2)  | 1226(11) | 4052(2)  | 56(2)        |

---

|        |         |           |         |       |
|--------|---------|-----------|---------|-------|
| C(9)   | 4605(2) | 1791(10)  | 4444(2) | 50(2) |
| C(10)  | 3704(1) | 4326(8)   | 5165(2) | 32(1) |
| C(11)  | 3431(2) | 5975(9)   | 5281(2) | 36(1) |
| C(12)  | 3024(2) | 5897(10)  | 5171(2) | 46(2) |
| C(13)  | 2892(2) | 4154(10)  | 4931(2) | 46(2) |
| C(14)  | 3160(2) | 2479(9)   | 4816(2) | 42(1) |
| C(15)  | 3566(2) | 2571(9)   | 4930(2) | 41(1) |
| C(16)  | 4218(1) | 3430(9)   | 5700(2) | 35(1) |
| C(17)  | 4532(2) | 4128(10)  | 5938(2) | 54(2) |
| C(18)  | 4613(2) | 3077(11)  | 6289(2) | 57(2) |
| C(19)  | 4367(2) | 1277(9)   | 6413(2) | 40(1) |
| C(20)  | 4053(2) | 573(10)   | 6182(2) | 46(2) |
| C(21)  | 3975(2) | 1652(9)   | 5828(2) | 43(2) |
| C(22)  | 4253(2) | -1647(11) | 6882(2) | 61(2) |
| O(2)   | 3061(1) | 8599(6)   | 6047(1) | 45(1) |
| C(1A)  | 3083(2) | 3136(9)   | 7710(2) | 44(2) |
| C(2A)  | 3320(1) | 5166(8)   | 7578(1) | 29(1) |
| C(3A)  | 2997(2) | 5448(8)   | 7892(2) | 36(1) |
| C(4A)  | 3086(2) | 6038(9)   | 8305(2) | 34(1) |
| C(5A)  | 2901(2) | 7947(9)   | 8464(2) | 46(2) |
| C(6A)  | 2970(2) | 8641(10)  | 8845(2) | 52(2) |
| C(7A)  | 3239(2) | 7358(11)  | 9074(2) | 51(2) |
| C(8A)  | 3428(2) | 5439(10)  | 8922(2) | 52(2) |
| C(9A)  | 3352(2) | 4776(9)   | 8544(2) | 47(2) |
| C(10A) | 3763(1) | 5339(8)   | 7683(1) | 30(1) |
| C(11A) | 3919(2) | 7281(9)   | 7864(2) | 36(1) |
| C(12A) | 4330(2) | 7456(11)  | 7948(2) | 50(2) |
| C(13A) | 4591(2) | 5689(11)  | 7861(2) | 49(2) |
| C(14A) | 4444(2) | 3772(11)  | 7679(2) | 48(2) |
| C(15A) | 4031(2) | 3578(9)   | 7598(2) | 40(1) |
| C(16A) | 3225(2) | 6093(9)   | 7175(2) | 32(1) |
| C(17A) | 3384(2) | 5019(9)   | 6840(2) | 39(1) |
| C(18A) | 3322(2) | 5873(9)   | 6475(2) | 40(1) |
| C(19A) | 3094(2) | 7856(9)   | 6426(2) | 37(1) |
| C(20A) | 2925(2) | 8945(9)   | 6745(2) | 43(1) |
| C(21A) | 2996(2) | 8039(9)   | 7114(2) | 39(1) |
| C(22A) | 2843(2) | 10679(9)  | 5979(2) | 52(2) |

---

**Table S9. Bond lengths [Å] for 3k**

---

|            |          |            |          |
|------------|----------|------------|----------|
| O(1)-C(19) | 1.377(6) | C(1)-H(1B) | 0.9900   |
| O(1)-C(22) | 1.426(7) | C(1)-C(2)  | 1.511(7) |
| C(1)-H(1A) | 0.9900   | C(1)-C(3)  | 1.512(7) |

---

---

|              |          |               |          |
|--------------|----------|---------------|----------|
| C(2)-C(3)    | 1.542(7) | C(22)-H(22B)  | 0.9800   |
| C(2)-C(10)   | 1.498(6) | C(22)-H(22C)  | 0.9800   |
| C(2)-C(16)   | 1.517(7) | O(2)-C(19A)   | 1.375(6) |
| C(3)-H(3)    | 1.0000   | O(2)-C(22A)   | 1.435(6) |
| C(3)-C(4)    | 1.489(8) | C(1A)-H(1AA)  | 0.9900   |
| C(4)-C(5)    | 1.391(8) | C(1A)-H(1AB)  | 0.9900   |
| C(4)-C(9)    | 1.395(8) | C(1A)-C(2A)   | 1.492(7) |
| C(5)-H(5)    | 0.9500   | C(1A)-C(3A)   | 1.521(7) |
| C(5)-C(6)    | 1.378(8) | C(2A)-C(3A)   | 1.519(6) |
| C(6)-H(6)    | 0.9500   | C(2A)-C(10A)  | 1.506(6) |
| C(6)-C(7)    | 1.403(8) | C(2A)-C(16A)  | 1.519(7) |
| C(7)-H(7)    | 0.9500   | C(3A)-H(3A)   | 1.0000   |
| C(7)-C(8)    | 1.373(8) | C(3A)-C(4A)   | 1.486(7) |
| C(8)-H(8)    | 0.9500   | C(4A)-C(5A)   | 1.387(7) |
| C(8)-C(9)    | 1.388(8) | C(4A)-C(9A)   | 1.407(7) |
| C(9)-H(9)    | 0.9500   | C(5A)-H(5A)   | 0.9500   |
| C(10)-C(11)  | 1.378(6) | C(5A)-C(6A)   | 1.386(8) |
| C(10)-C(15)  | 1.385(7) | C(6A)-H(6A)   | 0.9500   |
| C(11)-H(11)  | 0.9500   | C(6A)-C(7A)   | 1.400(8) |
| C(11)-C(12)  | 1.390(7) | C(7A)-H(7A)   | 0.9500   |
| C(12)-H(12)  | 0.9500   | C(7A)-C(8A)   | 1.387(8) |
| C(12)-C(13)  | 1.383(7) | C(8A)-H(8A)   | 0.9500   |
| C(13)-H(13)  | 0.9500   | C(8A)-C(9A)   | 1.376(7) |
| C(13)-C(14)  | 1.377(7) | C(9A)-H(9A)   | 0.9500   |
| C(14)-H(14)  | 0.9500   | C(10A)-C(11A) | 1.395(7) |
| C(14)-C(15)  | 1.392(6) | C(10A)-C(15A) | 1.388(6) |
| C(15)-H(15)  | 0.9500   | C(11A)-H(11A) | 0.9500   |
| C(16)-C(17)  | 1.379(7) | C(11A)-C(12A) | 1.385(7) |
| C(16)-C(21)  | 1.385(7) | C(12A)-H(12A) | 0.9500   |
| C(17)-H(17)  | 0.9500   | C(12A)-C(13A) | 1.378(8) |
| C(17)-C(18)  | 1.379(7) | C(13A)-H(13A) | 0.9500   |
| C(18)-H(18)  | 0.9500   | C(13A)-C(14A) | 1.374(8) |
| C(18)-C(19)  | 1.395(7) | C(14A)-H(14A) | 0.9500   |
| C(19)-C(20)  | 1.367(7) | C(14A)-C(15A) | 1.390(7) |
| C(20)-H(20)  | 0.9500   | C(15A)-H(15A) | 0.9500   |
| C(20)-C(21)  | 1.393(7) | C(16A)-C(17A) | 1.408(7) |
| C(21)-H(21)  | 0.9500   | C(16A)-C(21A) | 1.384(7) |
| C(22)-H(22A) | 0.9800   | C(17A)-H(17A) | 0.9500   |

---

|               |          |               |          |
|---------------|----------|---------------|----------|
| C(17A)-C(18A) | 1.362(7) | C(20A)-C(21A) | 1.394(7) |
| C(18A)-H(18A) | 0.9500   | C(21A)-H(21A) | 0.9500   |
| C(18A)-C(19A) | 1.394(7) | C(22A)-H(22D) | 0.9800   |
| C(19A)-C(20A) | 1.383(7) | C(22A)-H(22E) | 0.9800   |
| C(20A)-H(20A) | 0.9500   | C(22A)-H(22F) | 0.9800   |

---

**Table S10. Bond angles [°] for 3k**

---

|                  |          |                   |          |
|------------------|----------|-------------------|----------|
| C(19)-O(1)-C(22) | 116.4(4) | C(8)-C(7)-C(6)    | 119.6(6) |
| H(1A)-C(1)-H(1B) | 114.7    | C(8)-C(7)-H(7)    | 120.2    |
| C(2)-C(1)-H(1A)  | 117.6    | C(7)-C(8)-H(8)    | 120.0    |
| C(2)-C(1)-H(1B)  | 117.6    | C(7)-C(8)-C(9)    | 120.0(6) |
| C(2)-C(1)-C(3)   | 61.3(3)  | C(9)-C(8)-H(8)    | 120.0    |
| C(3)-C(1)-H(1A)  | 117.6    | C(4)-C(9)-H(9)    | 119.3    |
| C(3)-C(1)-H(1B)  | 117.6    | C(8)-C(9)-C(4)    | 121.5(6) |
| C(1)-C(2)-C(3)   | 59.4(3)  | C(8)-C(9)-H(9)    | 119.3    |
| C(1)-C(2)-C(16)  | 118.1(4) | C(11)-C(10)-C(2)  | 119.0(5) |
| C(10)-C(2)-C(1)  | 116.7(5) | C(11)-C(10)-C(15) | 118.4(5) |
| C(10)-C(2)-C(3)  | 121.1(4) | C(15)-C(10)-C(2)  | 122.6(4) |
| C(10)-C(2)-C(16) | 115.2(4) | C(10)-C(11)-H(11) | 119.1    |
| C(16)-C(2)-C(3)  | 115.2(4) | C(10)-C(11)-C(12) | 121.7(5) |
| C(1)-C(3)-C(2)   | 59.3(3)  | C(12)-C(11)-H(11) | 119.1    |
| C(1)-C(3)-H(3)   | 113.5    | C(11)-C(12)-H(12) | 120.4    |
| C(2)-C(3)-H(3)   | 113.5    | C(13)-C(12)-C(11) | 119.2(5) |
| C(4)-C(3)-C(1)   | 123.2(5) | C(13)-C(12)-H(12) | 120.4    |
| C(4)-C(3)-C(2)   | 123.6(4) | C(12)-C(13)-H(13) | 120.1    |
| C(4)-C(3)-H(3)   | 113.5    | C(14)-C(13)-C(12) | 119.9(5) |
| C(5)-C(4)-C(3)   | 123.3(5) | C(14)-C(13)-H(13) | 120.1    |
| C(5)-C(4)-C(9)   | 117.6(6) | C(13)-C(14)-H(14) | 119.9    |
| C(9)-C(4)-C(3)   | 119.0(5) | C(13)-C(14)-C(15) | 120.2(5) |
| C(4)-C(5)-H(5)   | 119.3    | C(15)-C(14)-H(14) | 119.9    |
| C(6)-C(5)-C(4)   | 121.5(6) | C(10)-C(15)-C(14) | 120.5(5) |
| C(6)-C(5)-H(5)   | 119.3    | C(10)-C(15)-H(15) | 119.7    |
| C(5)-C(6)-H(6)   | 120.1    | C(14)-C(15)-H(15) | 119.7    |
| C(5)-C(6)-C(7)   | 119.8(6) | C(17)-C(16)-C(2)  | 122.9(5) |
| C(7)-C(6)-H(6)   | 120.1    | C(17)-C(16)-C(21) | 117.9(5) |
| C(6)-C(7)-H(7)   | 120.2    | C(21)-C(16)-C(2)  | 119.1(5) |

---

---

|                     |          |                      |          |
|---------------------|----------|----------------------|----------|
| C(16)-C(17)-H(17)   | 119.1    | C(4A)-C(3A)-C(2A)    | 124.4(4) |
| C(16)-C(17)-C(18)   | 121.9(5) | C(4A)-C(3A)-H(3A)    | 113.0    |
| C(18)-C(17)-H(17)   | 119.1    | C(5A)-C(4A)-C(3A)    | 118.5(5) |
| C(17)-C(18)-H(18)   | 120.2    | C(5A)-C(4A)-C(9A)    | 118.0(5) |
| C(17)-C(18)-C(19)   | 119.6(5) | C(9A)-C(4A)-C(3A)    | 123.6(5) |
| C(19)-C(18)-H(18)   | 120.2    | C(4A)-C(5A)-H(5A)    | 118.8    |
| O(1)-C(19)-C(18)    | 115.2(5) | C(6A)-C(5A)-C(4A)    | 122.3(6) |
| C(20)-C(19)-O(1)    | 125.5(5) | C(6A)-C(5A)-H(5A)    | 118.8    |
| C(20)-C(19)-C(18)   | 119.3(5) | C(5A)-C(6A)-H(6A)    | 120.9    |
| C(19)-C(20)-H(20)   | 119.8    | C(5A)-C(6A)-C(7A)    | 118.3(6) |
| C(19)-C(20)-C(21)   | 120.4(5) | C(7A)-C(6A)-H(6A)    | 120.9    |
| C(21)-C(20)-H(20)   | 119.8    | C(6A)-C(7A)-H(7A)    | 119.7    |
| C(16)-C(21)-C(20)   | 120.9(5) | C(8A)-C(7A)-C(6A)    | 120.5(6) |
| C(16)-C(21)-H(21)   | 119.6    | C(8A)-C(7A)-H(7A)    | 119.7    |
| C(20)-C(21)-H(21)   | 119.6    | C(7A)-C(8A)-H(8A)    | 119.9    |
| O(1)-C(22)-H(22A)   | 109.5    | C(9A)-C(8A)-C(7A)    | 120.1(6) |
| O(1)-C(22)-H(22B)   | 109.5    | C(9A)-C(8A)-H(8A)    | 119.9    |
| O(1)-C(22)-H(22C)   | 109.5    | C(4A)-C(9A)-H(9A)    | 119.6    |
| H(22A)-C(22)-H(22B) | 109.5    | C(8A)-C(9A)-C(4A)    | 120.8(5) |
| H(22A)-C(22)-H(22C) | 109.5    | C(8A)-C(9A)-H(9A)    | 119.6    |
| H(22B)-C(22)-H(22C) | 109.5    | C(11A)-C(10A)-C(2A)  | 121.0(4) |
| C(19A)-O(2)-C(22A)  | 117.6(4) | C(15A)-C(10A)-C(2A)  | 120.9(5) |
| H(1AA)-C(1A)-H(1AB) | 114.8    | C(15A)-C(10A)-C(11A) | 118.0(5) |
| C(2A)-C(1A)-H(1AA)  | 117.7    | C(10A)-C(11A)-H(11A) | 119.7    |
| C(2A)-C(1A)-H(1AB)  | 117.7    | C(12A)-C(11A)-C(10A) | 120.7(5) |
| C(2A)-C(1A)-C(3A)   | 60.5(3)  | C(12A)-C(11A)-H(11A) | 119.7    |
| C(3A)-C(1A)-H(1AA)  | 117.7    | C(11A)-C(12A)-H(12A) | 119.8    |
| C(3A)-C(1A)-H(1AB)  | 117.7    | C(13A)-C(12A)-C(11A) | 120.4(6) |
| C(1A)-C(2A)-C(3A)   | 60.7(3)  | C(13A)-C(12A)-H(12A) | 119.8    |
| C(1A)-C(2A)-C(10A)  | 119.1(4) | C(12A)-C(13A)-H(13A) | 120.1    |
| C(1A)-C(2A)-C(16A)  | 117.0(4) | C(14A)-C(13A)-C(12A) | 119.8(5) |
| C(3A)-C(2A)-C(16A)  | 117.7(4) | C(14A)-C(13A)-H(13A) | 120.1    |
| C(10A)-C(2A)-C(3A)  | 119.9(4) | C(13A)-C(14A)-H(14A) | 120.0    |
| C(10A)-C(2A)-C(16A) | 113.0(4) | C(13A)-C(14A)-C(15A) | 120.0(5) |
| C(1A)-C(3A)-H(3A)   | 113.0    | C(15A)-C(14A)-H(14A) | 120.0    |
| C(2A)-C(3A)-C(1A)   | 58.8(3)  | C(10A)-C(15A)-H(15A) | 119.5    |
| C(2A)-C(3A)-H(3A)   | 113.0    | C(14A)-C(15A)-C(10A) | 121.1(5) |
| C(4A)-C(3A)-C(1A)   | 124.4(5) | C(14A)-C(15A)-H(15A) | 119.5    |

|                      |          |                      |          |
|----------------------|----------|----------------------|----------|
| C(17A)-C(16A)-C(2A)  | 120.5(5) | C(19A)-C(20A)-H(20A) | 120.8    |
| C(21A)-C(16A)-C(2A)  | 122.8(5) | C(19A)-C(20A)-C(21A) | 118.3(5) |
| C(21A)-C(16A)-C(17A) | 116.7(5) | C(21A)-C(20A)-H(20A) | 120.8    |
| C(16A)-C(17A)-H(17A) | 119.1    | C(16A)-C(21A)-C(20A) | 122.8(5) |
| C(18A)-C(17A)-C(16A) | 121.9(5) | C(16A)-C(21A)-H(21A) | 118.6    |
| C(18A)-C(17A)-H(17A) | 119.1    | C(20A)-C(21A)-H(21A) | 118.6    |
| C(17A)-C(18A)-H(18A) | 120.1    | O(2)-C(22A)-H(22D)   | 109.5    |
| C(17A)-C(18A)-C(19A) | 119.9(5) | O(2)-C(22A)-H(22E)   | 109.5    |
| C(19A)-C(18A)-H(18A) | 120.1    | O(2)-C(22A)-H(22F)   | 109.5    |
| O(2)-C(19A)-C(18A)   | 115.0(5) | H(22D)-C(22A)-H(22E) | 109.5    |
| O(2)-C(19A)-C(20A)   | 124.6(5) | H(22D)-C(22A)-H(22F) | 109.5    |
| C(20A)-C(19A)-C(18A) | 120.4(5) | H(22E)-C(22A)-H(22F) | 109.5    |

**Table S11. Anisotropic displacement parameters ( $\text{\AA}^2 \times 10^3$ ) for 3k.** The anisotropic displacement factor exponent takes the form:  $-2\pi^2 [h^2 a^{*2} U^{11} + \dots + 2hka^* b^* U^{12}]$

|       | $U^{11}$ | $U^{22}$ | $U^{33}$ | $U^{23}$ | $U^{13}$ | $U^{12}$ |
|-------|----------|----------|----------|----------|----------|----------|
| O(1)  | 39(3)    | 75(3)    | 57(3)    | 19(2)    | -8(2)    | -14(2)   |
| C(1)  | 34(4)    | 38(3)    | 57(4)    | 7(3)     | 1(3)     | -9(3)    |
| C(2)  | 17(3)    | 27(3)    | 50(3)    | -2(2)    | 9(2)     | -6(2)    |
| C(3)  | 22(3)    | 35(3)    | 59(4)    | 10(3)    | 5(3)     | -3(2)    |
| C(4)  | 22(3)    | 35(3)    | 63(4)    | 11(3)    | 12(3)    | -4(2)    |
| C(5)  | 54(4)    | 51(4)    | 52(4)    | 0(3)     | 12(3)    | 2(3)     |
| C(6)  | 59(5)    | 68(5)    | 54(4)    | 0(4)     | 4(3)     | 3(4)     |
| C(7)  | 59(5)    | 64(4)    | 52(4)    | -8(4)    | 14(3)    | -15(4)   |
| C(8)  | 53(4)    | 46(4)    | 70(5)    | -15(4)   | 20(3)    | -10(3)   |
| C(9)  | 30(4)    | 38(3)    | 83(5)    | 11(3)    | 10(3)    | -4(3)    |
| C(10) | 14(3)    | 30(3)    | 52(3)    | 4(3)     | 3(2)     | 1(2)     |
| C(11) | 21(3)    | 34(3)    | 52(4)    | 4(3)     | 4(2)     | 3(2)     |
| C(12) | 30(4)    | 46(3)    | 61(4)    | 3(3)     | 2(3)     | 11(3)    |
| C(13) | 28(3)    | 49(4)    | 62(4)    | 6(3)     | 0(3)     | -1(3)    |
| C(14) | 20(3)    | 48(4)    | 58(4)    | 1(3)     | 1(3)     | -8(3)    |
| C(15) | 22(3)    | 47(3)    | 53(4)    | -7(3)    | -1(2)    | 1(2)     |
| C(16) | 13(3)    | 37(3)    | 55(4)    | 4(3)     | 4(2)     | -4(2)    |
| C(17) | 32(4)    | 58(4)    | 71(4)    | 18(3)    | -16(3)   | -17(3)   |
| C(18) | 35(4)    | 70(4)    | 66(4)    | 18(4)    | -13(3)   | -22(3)   |
| C(19) | 25(3)    | 49(3)    | 46(4)    | 7(3)     | -3(2)    | -5(3)    |
| C(20) | 30(3)    | 48(4)    | 61(4)    | 9(3)     | -5(3)    | -12(3)   |
| C(21) | 38(4)    | 41(3)    | 50(4)    | 10(3)    | -9(3)    | -16(3)   |
| C(22) | 63(5)    | 60(4)    | 59(4)    | 19(3)    | 0(3)     | -19(4)   |

|        |       |       |       |       |        |        |
|--------|-------|-------|-------|-------|--------|--------|
| O(2)   | 40(3) | 45(2) | 50(3) | -3(2) | -6(2)  | 5(2)   |
| C(1A)  | 39(4) | 31(3) | 63(4) | -1(3) | 9(3)   | -9(3)  |
| C(2A)  | 16(3) | 28(3) | 43(3) | -1(2) | -2(2)  | -3(2)  |
| C(3A)  | 18(3) | 36(3) | 52(4) | -1(3) | 0(2)   | 3(2)   |
| C(4A)  | 14(3) | 40(3) | 49(3) | 0(3)  | 8(2)   | -2(2)  |
| C(5A)  | 40(4) | 44(3) | 55(4) | -1(3) | 9(3)   | 4(3)   |
| C(6A)  | 52(4) | 44(4) | 60(4) | -5(3) | 6(3)   | 11(3)  |
| C(7A)  | 42(4) | 55(4) | 56(4) | -8(3) | 2(3)   | 4(3)   |
| C(8A)  | 46(4) | 62(4) | 47(4) | 5(3)  | -5(3)  | 9(3)   |
| C(9A)  | 41(4) | 38(3) | 62(4) | 6(3)  | 8(3)   | 11(3)  |
| C(10A) | 17(3) | 25(3) | 48(3) | 1(2)  | 3(2)   | 6(2)   |
| C(11A) | 26(3) | 36(3) | 46(3) | 1(3)  | 1(2)   | -1(2)  |
| C(12A) | 37(4) | 56(4) | 57(4) | -2(3) | -5(3)  | -17(3) |
| C(13A) | 25(3) | 71(5) | 50(4) | 13(3) | -7(3)  | -1(3)  |
| C(14A) | 26(3) | 56(4) | 61(4) | 3(3)  | 2(3)   | 17(3)  |
| C(15A) | 29(3) | 36(3) | 54(4) | 3(3)  | 4(3)   | 12(2)  |
| C(16A) | 16(3) | 31(3) | 48(3) | -8(3) | -4(2)  | 4(2)   |
| C(17A) | 28(3) | 33(3) | 55(4) | -9(3) | 1(2)   | 3(2)   |
| C(18A) | 27(3) | 46(3) | 48(4) | -6(3) | 2(2)   | 3(2)   |
| C(19A) | 25(3) | 39(3) | 47(4) | -4(3) | -6(2)  | 1(2)   |
| C(20A) | 40(4) | 42(3) | 47(4) | 0(3)  | -8(3)  | 8(3)   |
| C(21A) | 29(3) | 34(3) | 55(4) | -5(3) | 0(3)   | 8(2)   |
| C(22A) | 52(4) | 50(4) | 54(4) | 2(3)  | -12(3) | 8(3)   |

**Table S12. Hydrogen coordinates ( $\times 10^4$ ) and isotropic displacement parameters ( $\text{\AA}^2 \times 10^3$ ) for 3k.**

|       | <b>x</b> | <b>y</b> | <b>z</b> | <b>U(eq)</b> |
|-------|----------|----------|----------|--------------|
| H(1A) | 4552     | 7272     | 5390     | 52           |
| H(1B) | 4231     | 7716     | 5021     | 52           |
| H(3)  | 4748     | 3698     | 5128     | 46           |
| H(5)  | 4135     | 6652     | 4422     | 63           |
| H(6)  | 4082     | 5747     | 3765     | 72           |
| H(7)  | 4369     | 2337     | 3528     | 70           |
| H(8)  | 4679     | -178     | 3960     | 68           |
| H(9)  | 4740     | 776      | 4617     | 61           |
| H(11) | 3524     | 7197     | 5439     | 43           |
| H(12) | 2839     | 7027     | 5260     | 55           |
| H(13) | 2617     | 4112     | 4846     | 56           |
| H(14) | 3067     | 1255     | 4658     | 50           |
| H(15) | 3749     | 1422     | 4846     | 49           |
| H(17) | 4698     | 5369     | 5858     | 64           |

---

|        |      |       |      |    |
|--------|------|-------|------|----|
| H(18)  | 4834 | 3575  | 6446 | 68 |
| H(20)  | 3886 | -661  | 6263 | 55 |
| H(21)  | 3752 | 1163  | 5672 | 52 |
| H(22A) | 4274 | -2810 | 6678 | 91 |
| H(22B) | 3966 | -1249 | 6922 | 91 |
| H(22C) | 4367 | -2242 | 7126 | 91 |
| H(1AA) | 3226 | 1987  | 7871 | 53 |
| H(1AB) | 2877 | 2507  | 7528 | 53 |
| H(3A)  | 2741 | 6164  | 7793 | 43 |
| H(5A)  | 2719 | 8810  | 8307 | 56 |
| H(6A)  | 2840 | 9954  | 8947 | 62 |
| H(7A)  | 3292 | 7806  | 9335 | 61 |
| H(8A)  | 3609 | 4581  | 9080 | 62 |
| H(9A)  | 3480 | 3452  | 8443 | 56 |
| H(11A) | 3741 | 8496  | 7931 | 43 |
| H(12A) | 4433 | 8802  | 8067 | 60 |
| H(13A) | 4871 | 5796  | 7927 | 59 |
| H(14A) | 4625 | 2579  | 7609 | 57 |
| H(15A) | 3931 | 2219  | 7483 | 48 |
| H(17A) | 3538 | 3660  | 6870 | 46 |
| H(18A) | 3434 | 5117  | 6255 | 48 |
| H(20A) | 2764 | 10277 | 6713 | 51 |
| H(21A) | 2882 | 8789  | 7334 | 47 |
| H(22D) | 2863 | 11091 | 5703 | 78 |
| H(22E) | 2960 | 11898 | 6139 | 78 |
| H(22F) | 2556 | 10469 | 6050 | 78 |

---



## 7.2 NMR spectra

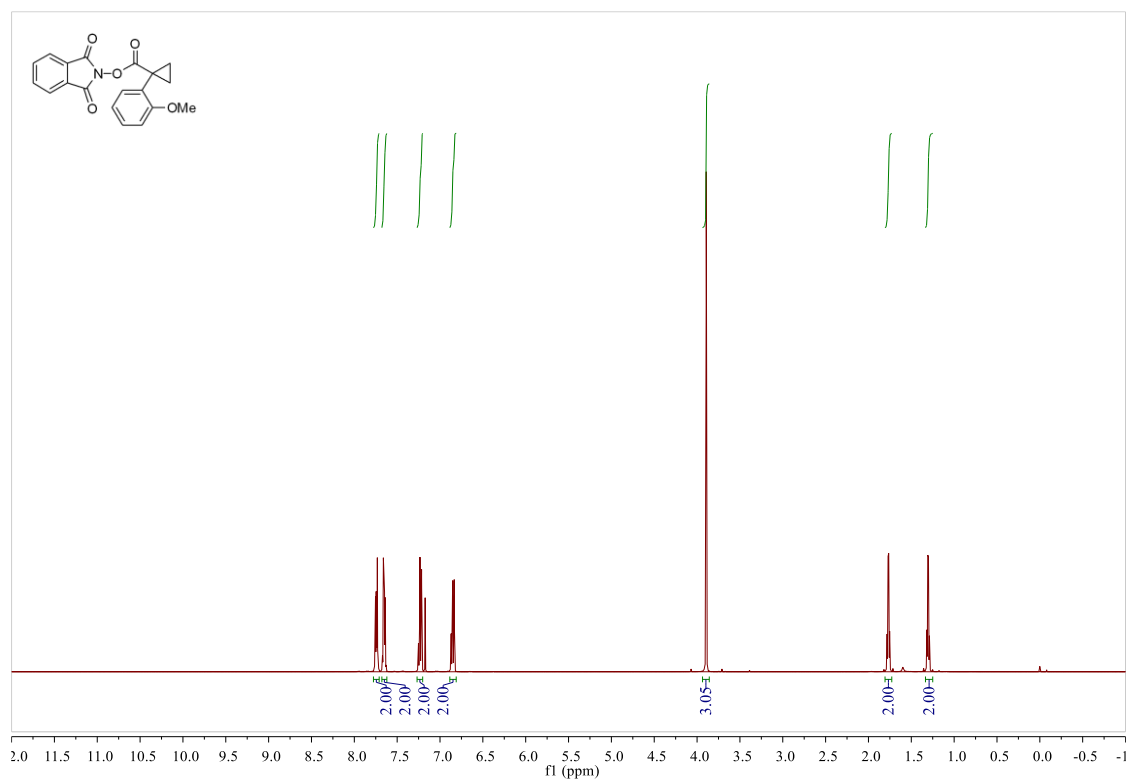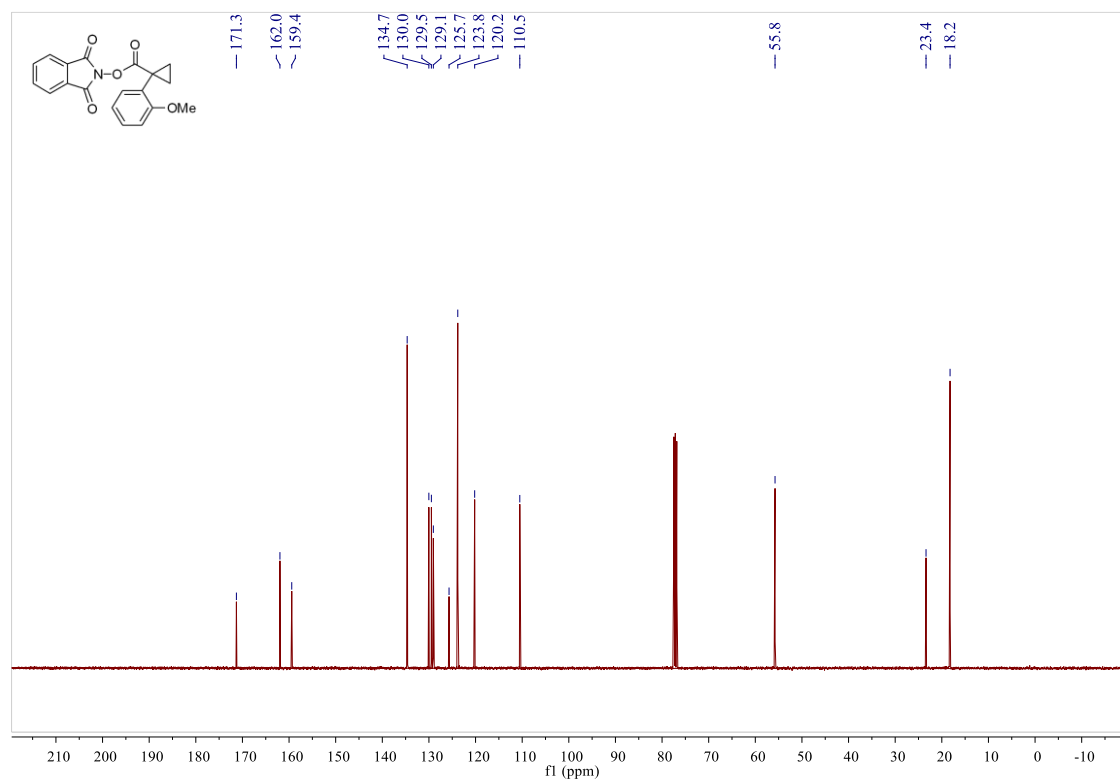

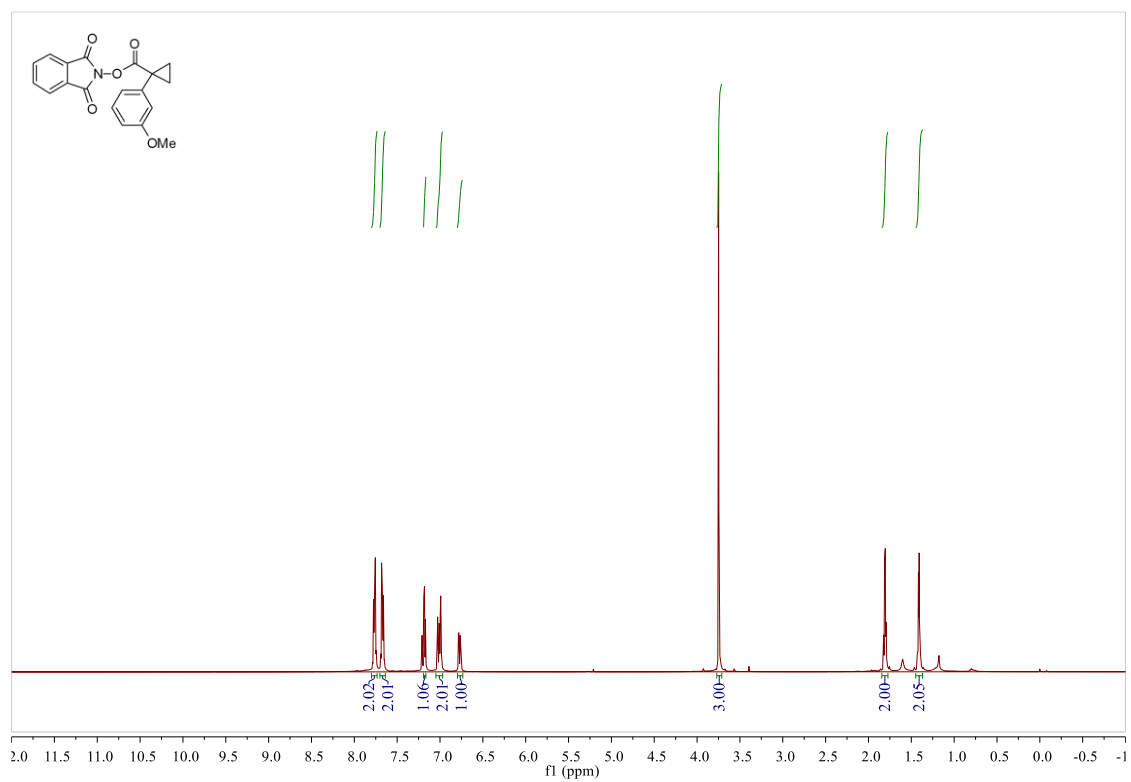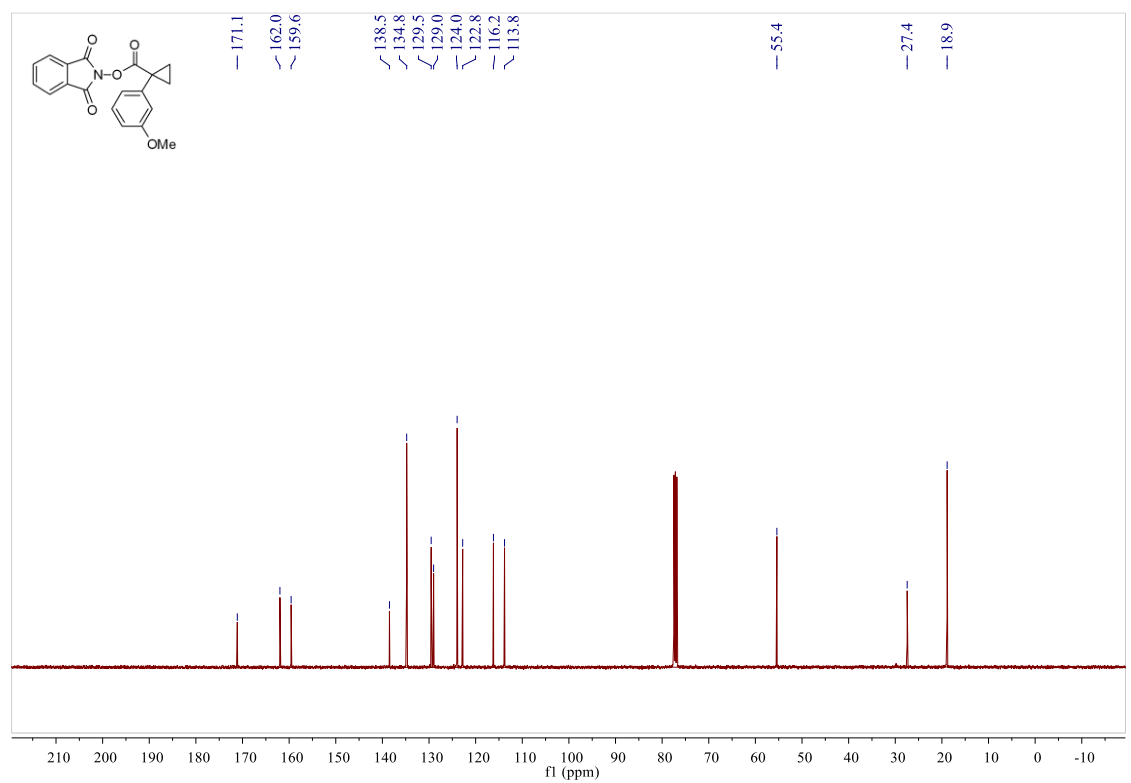

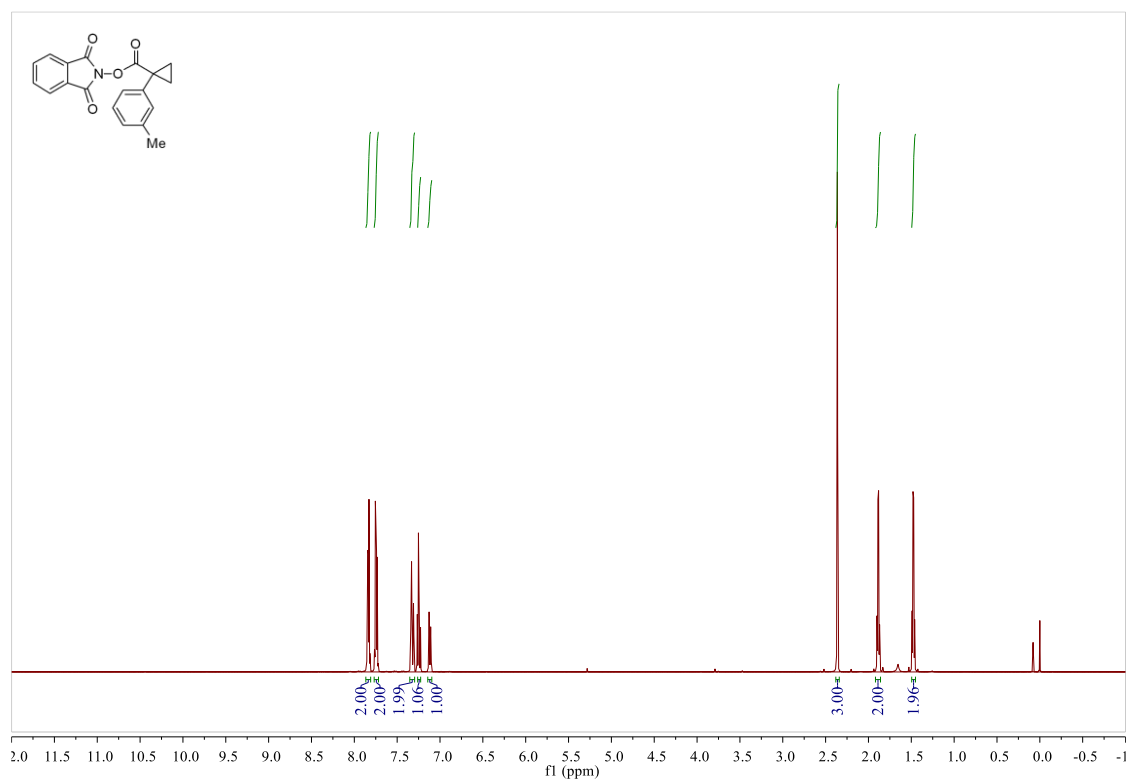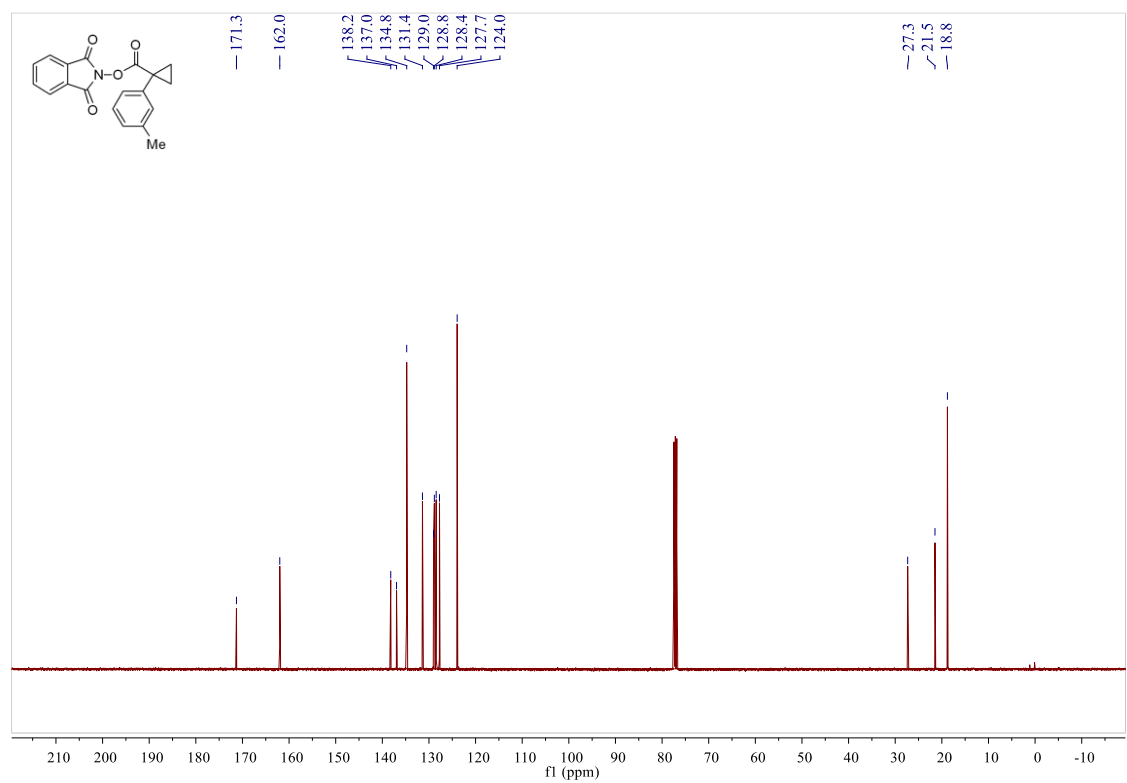

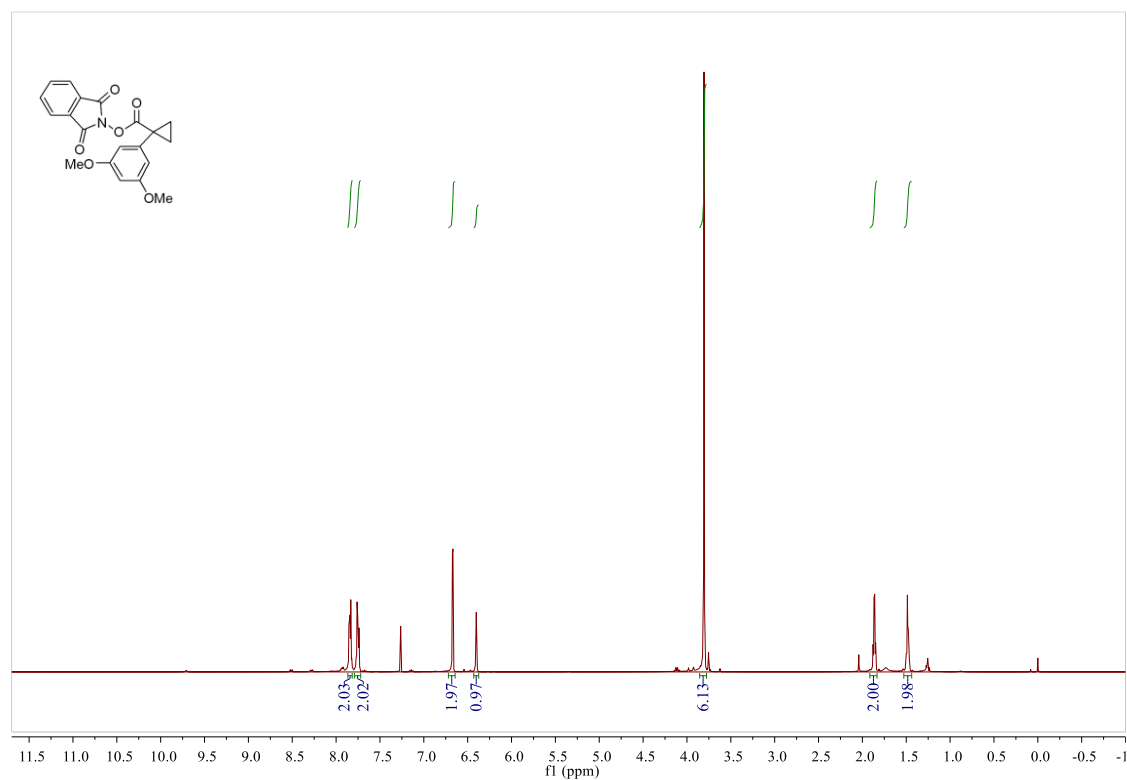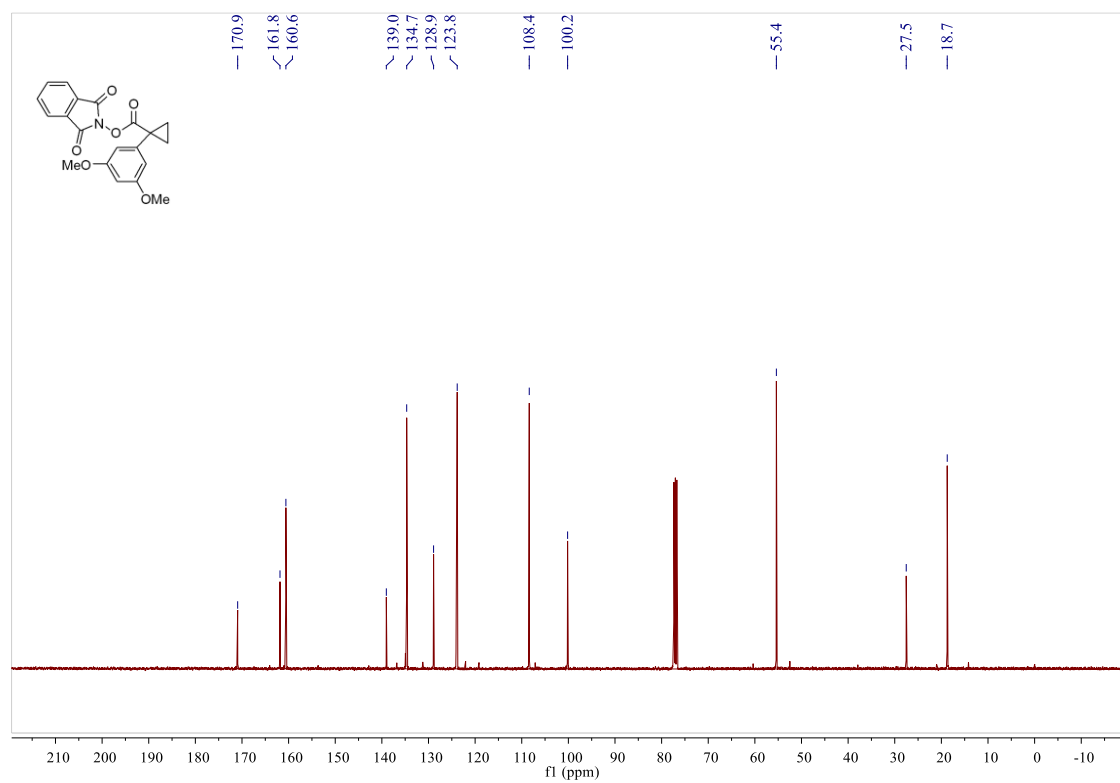

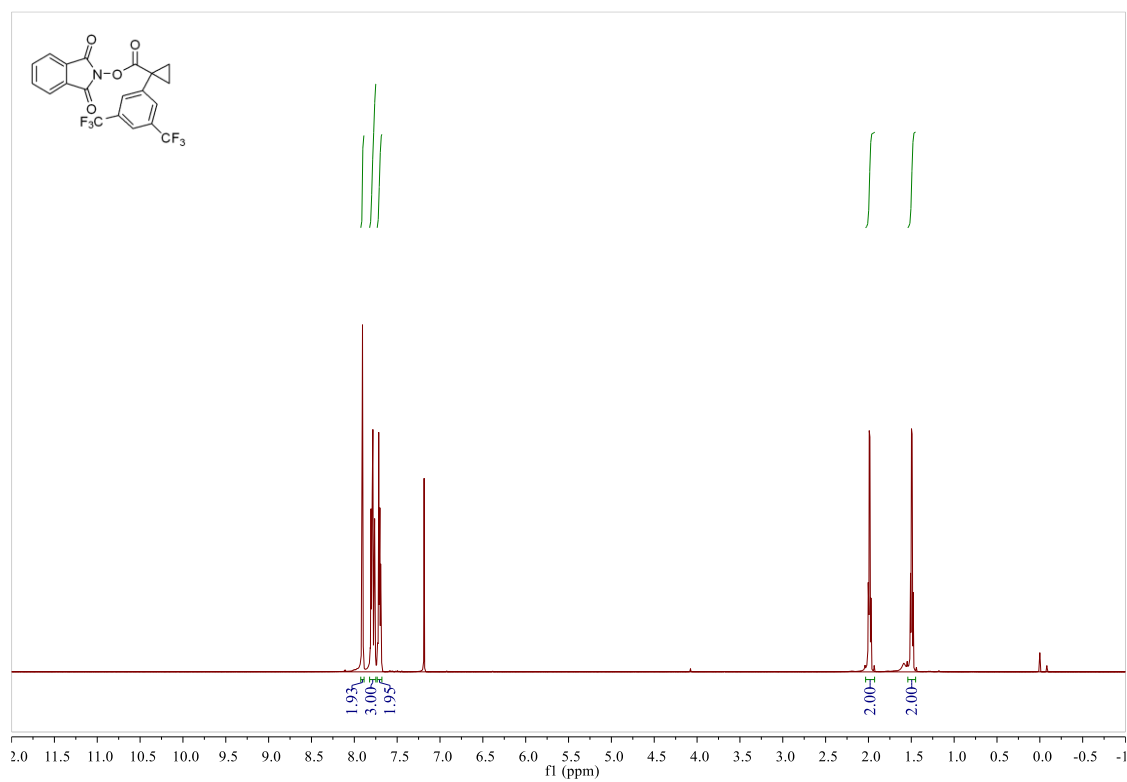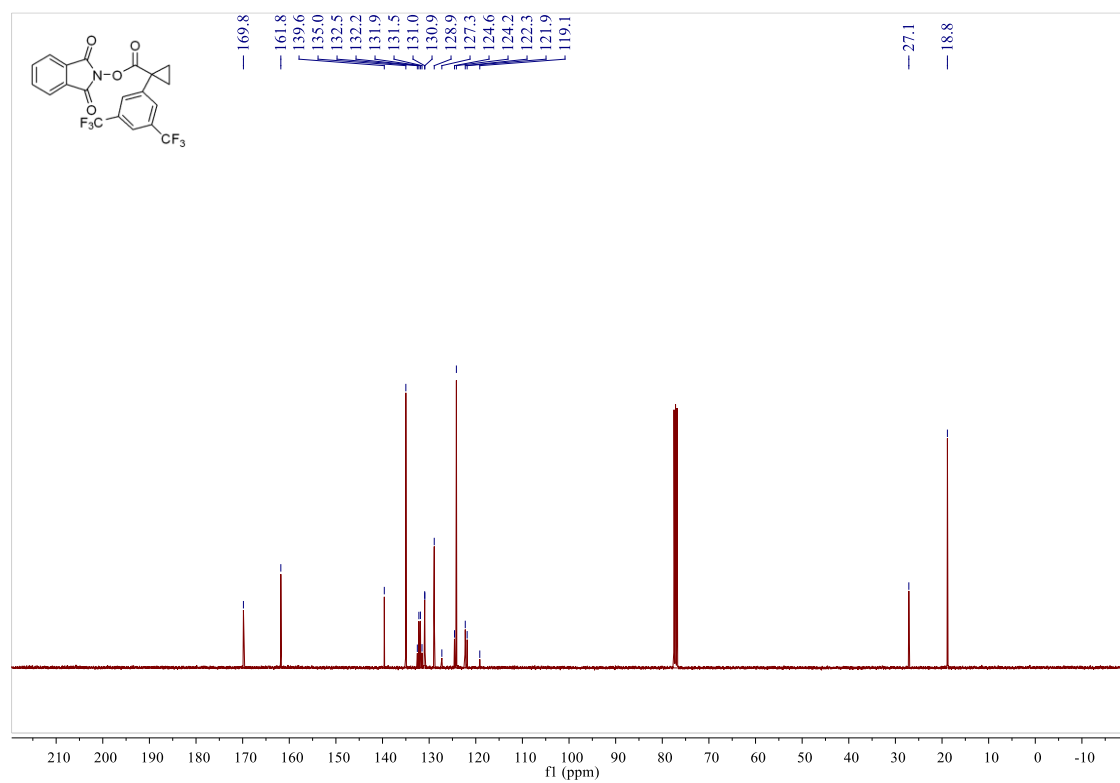

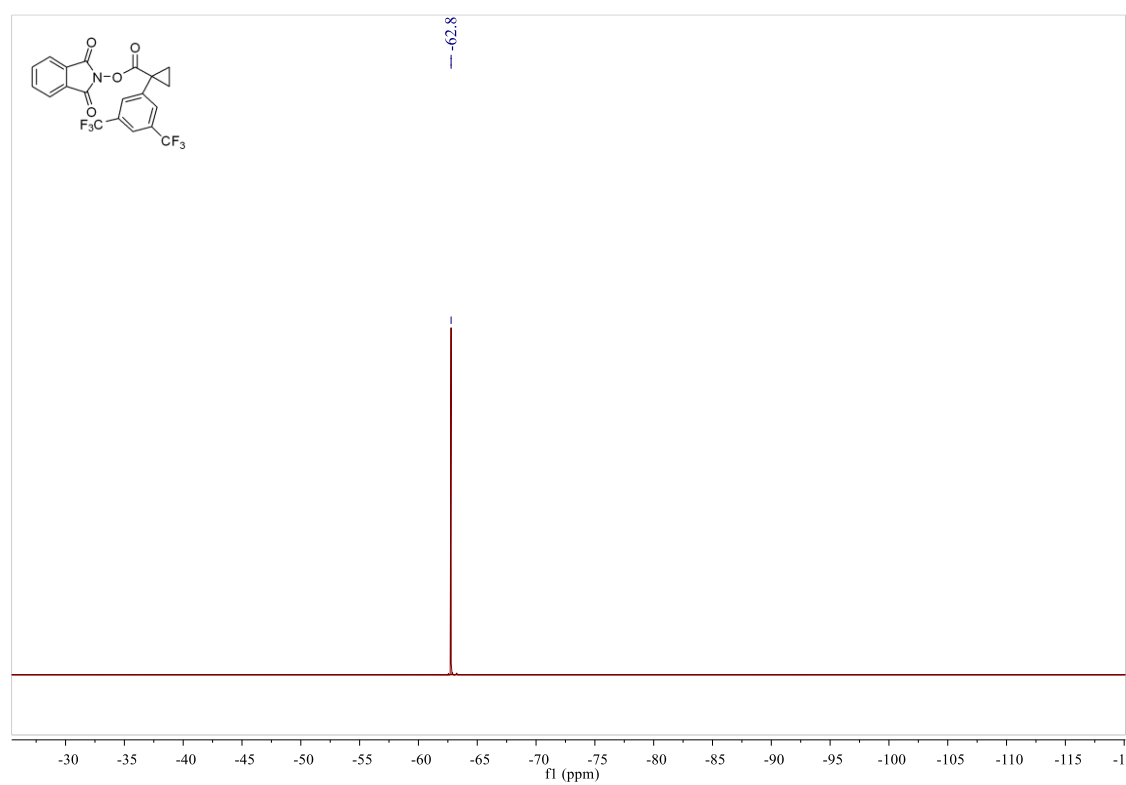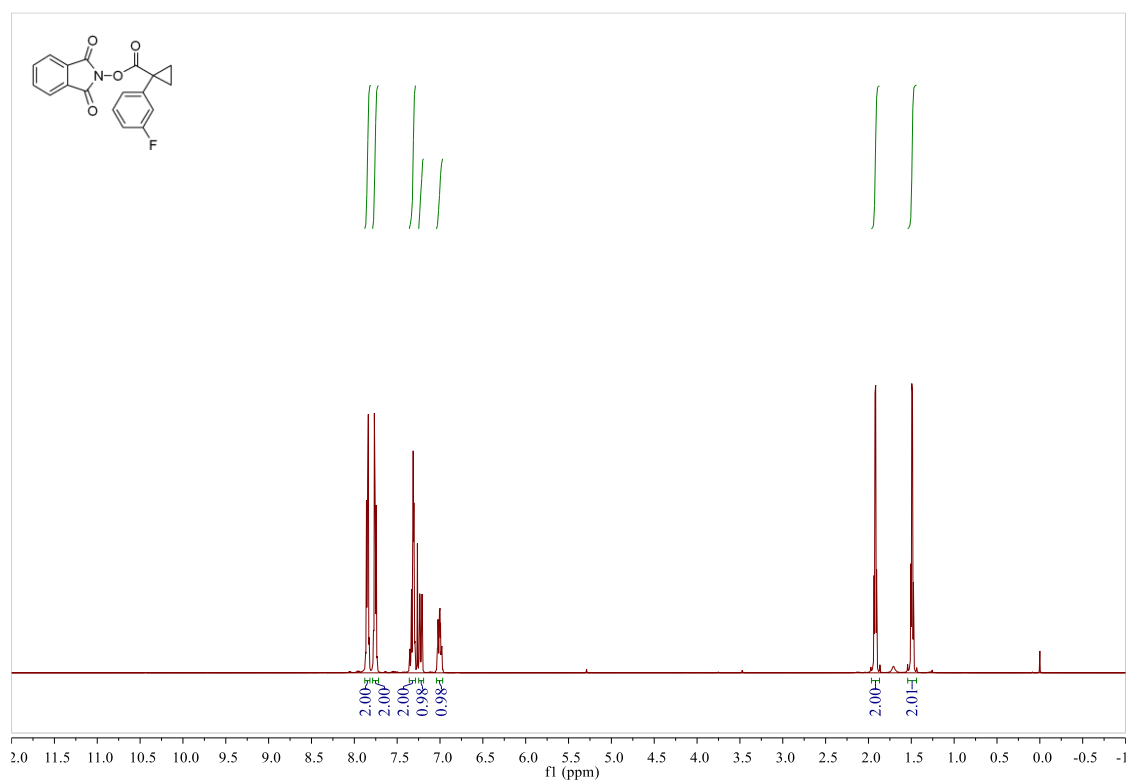

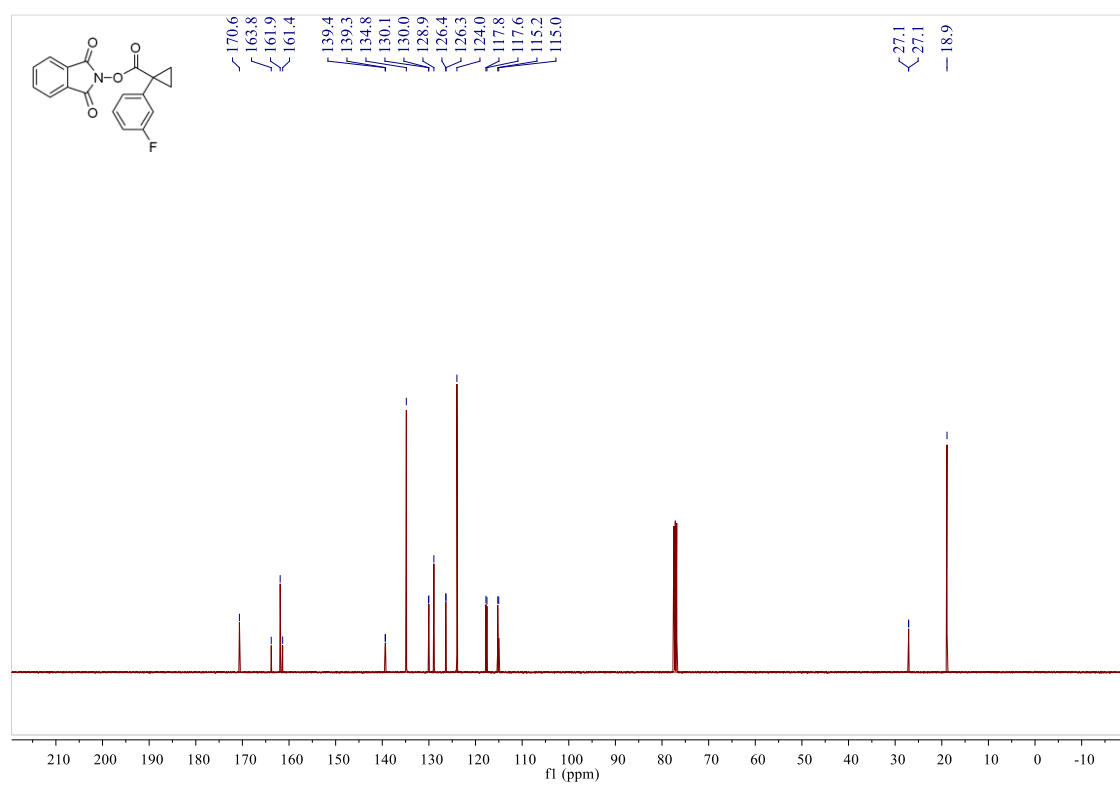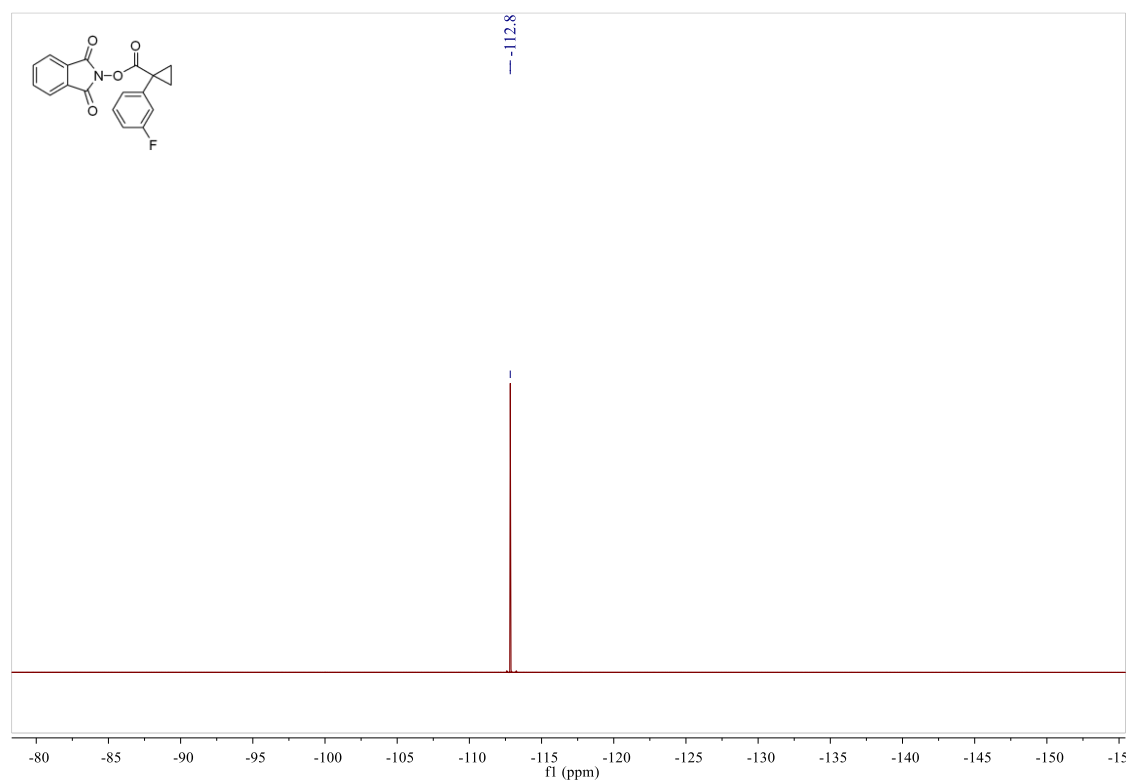

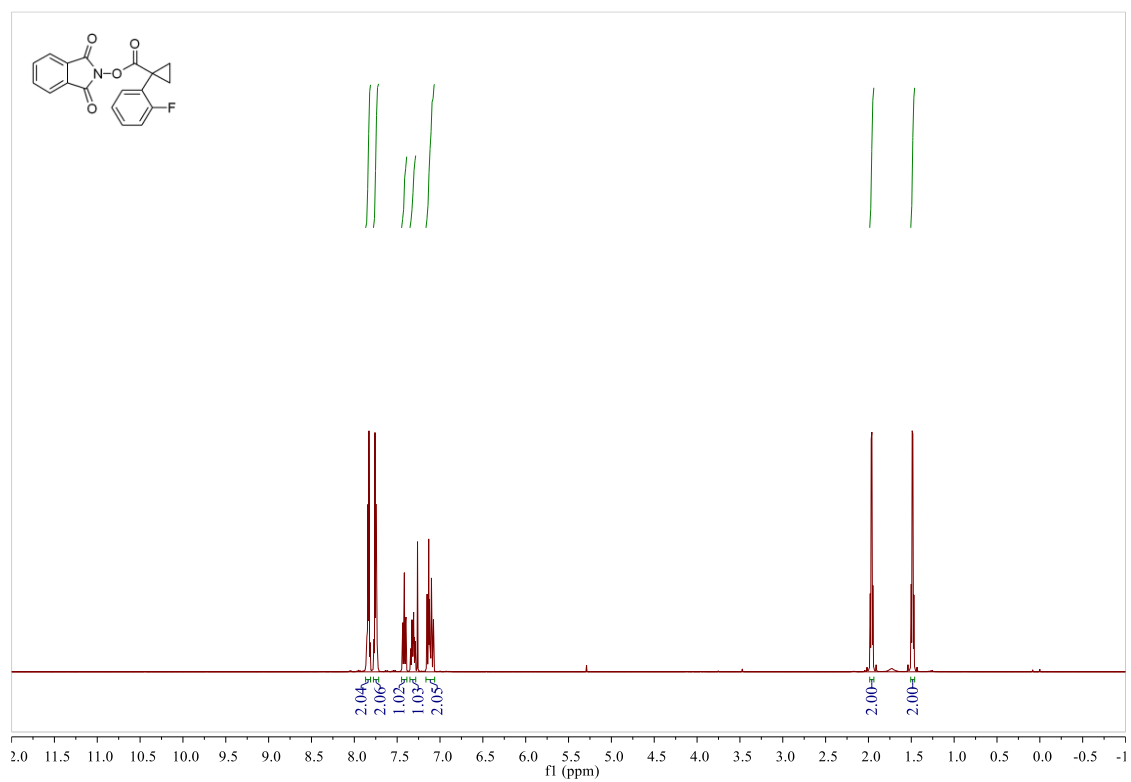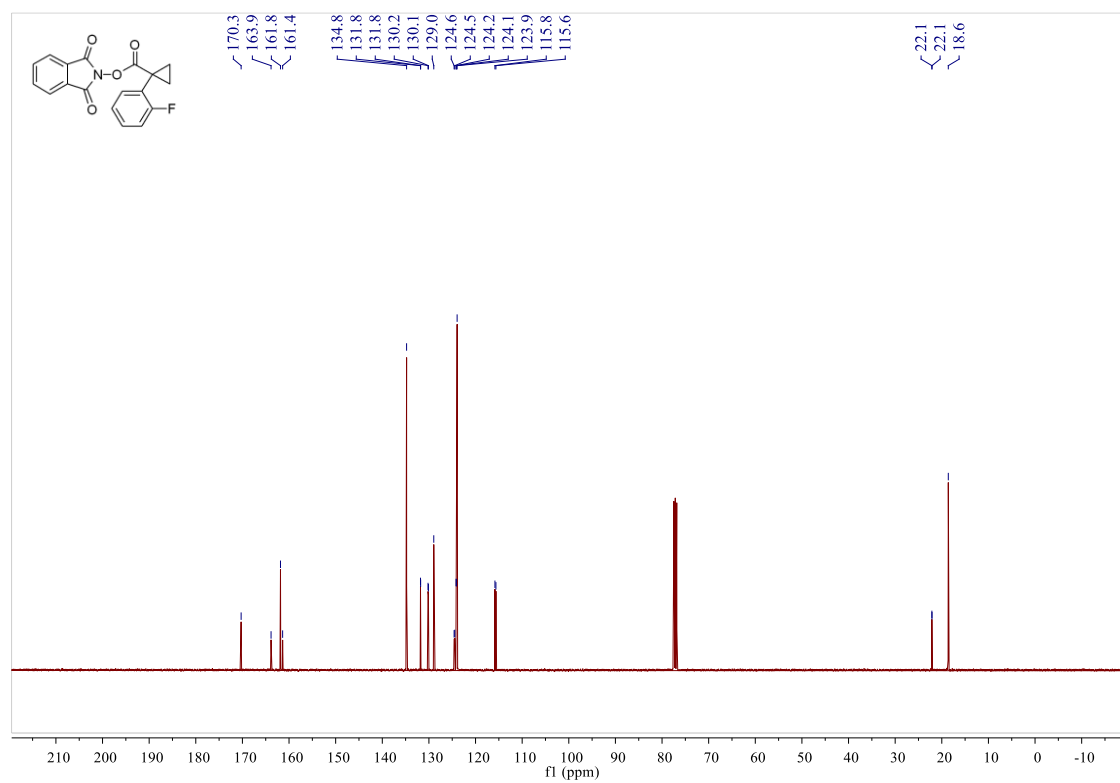



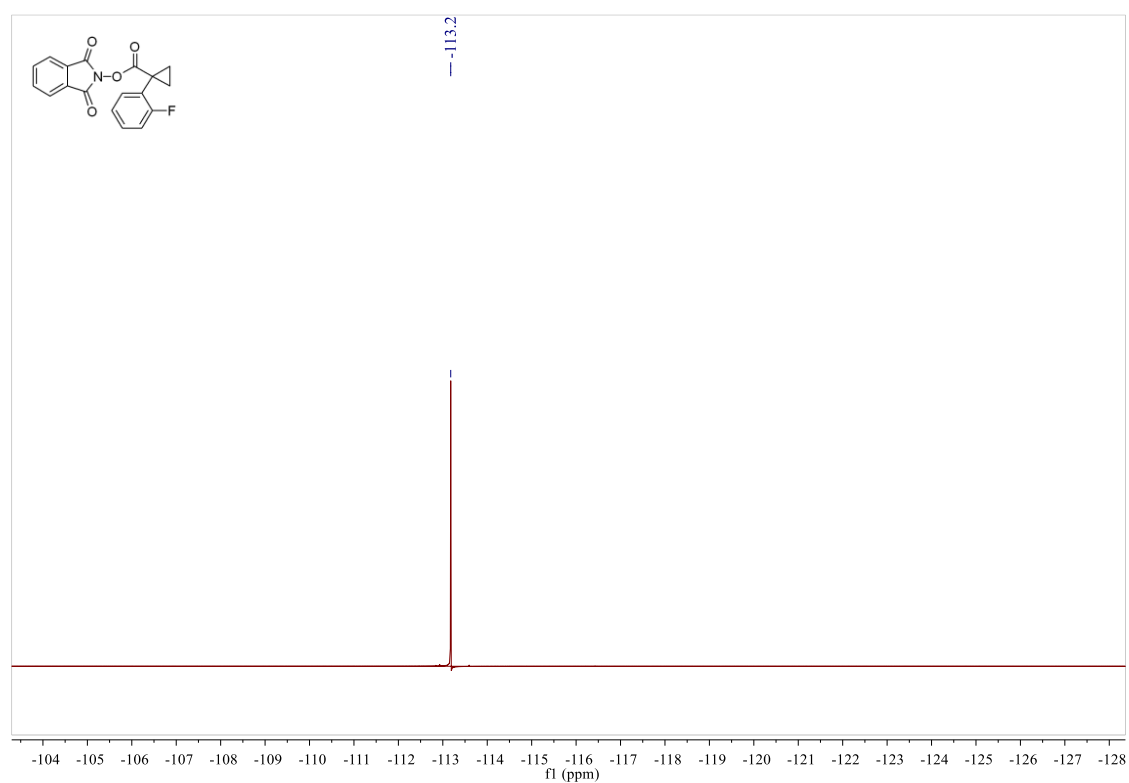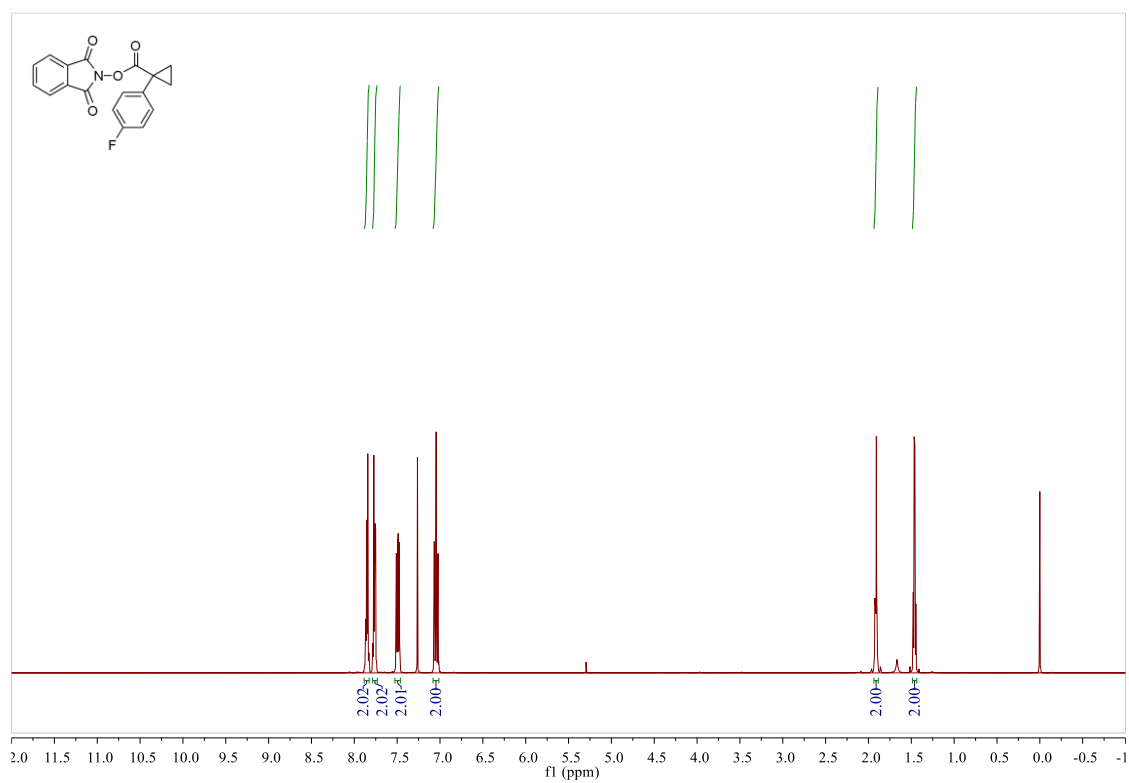

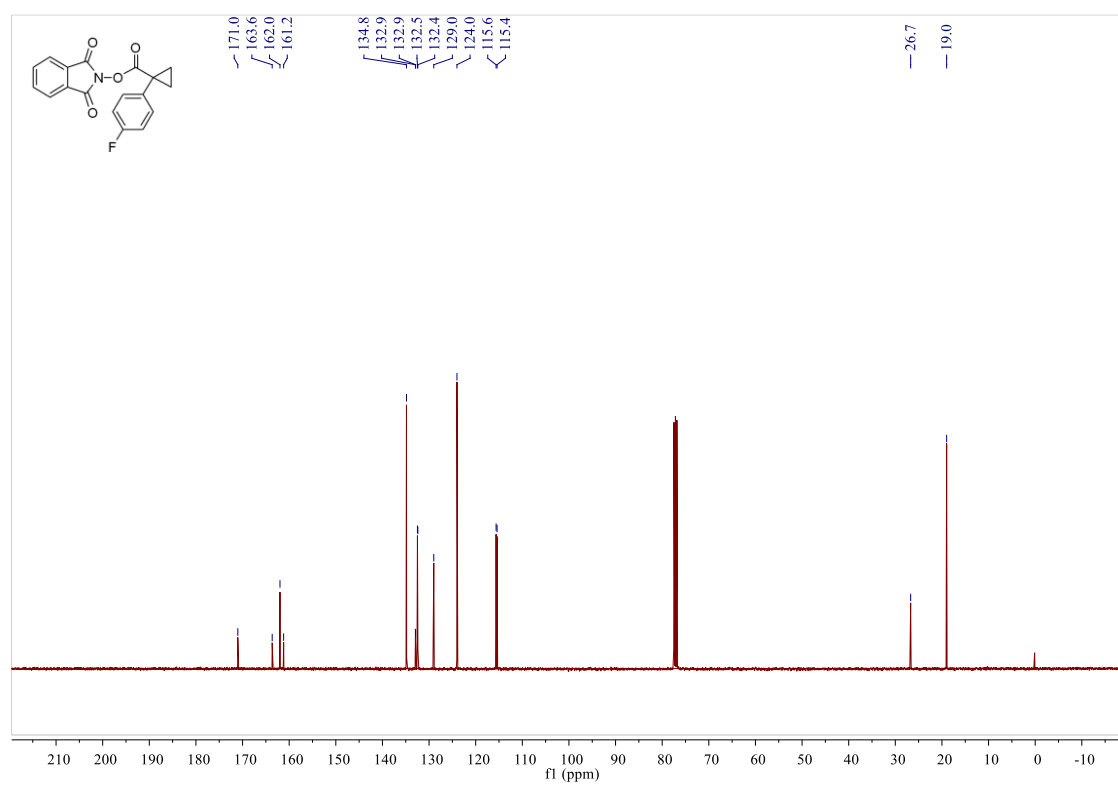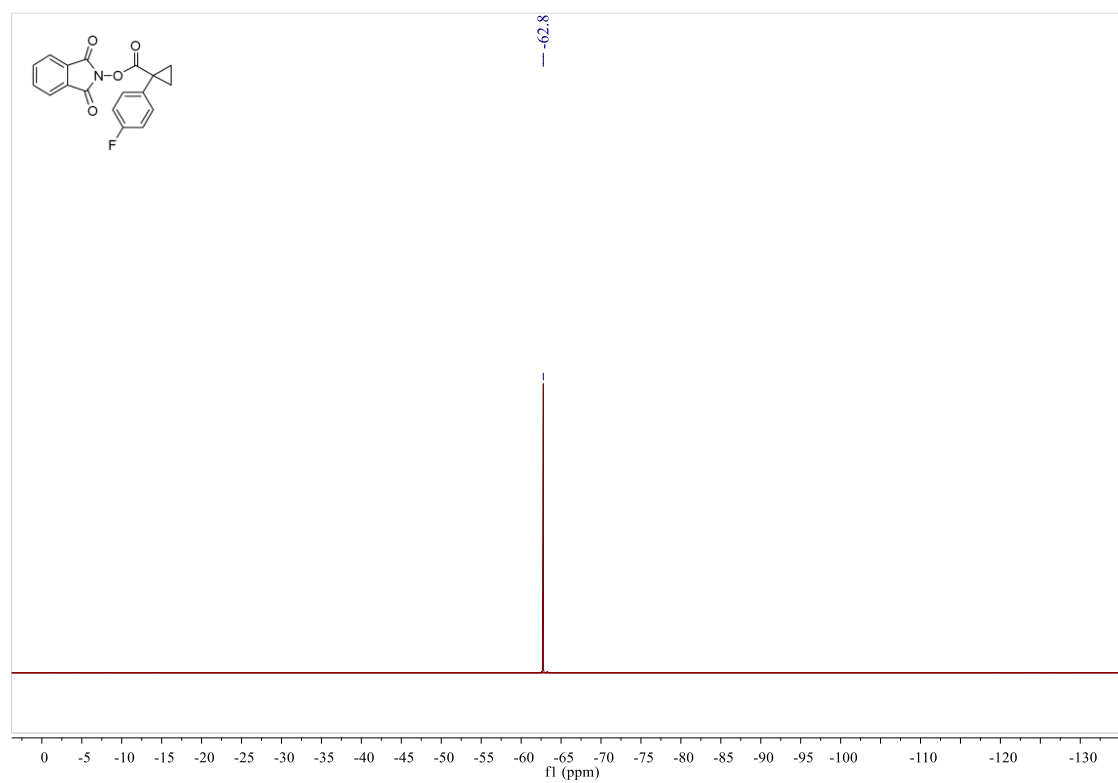

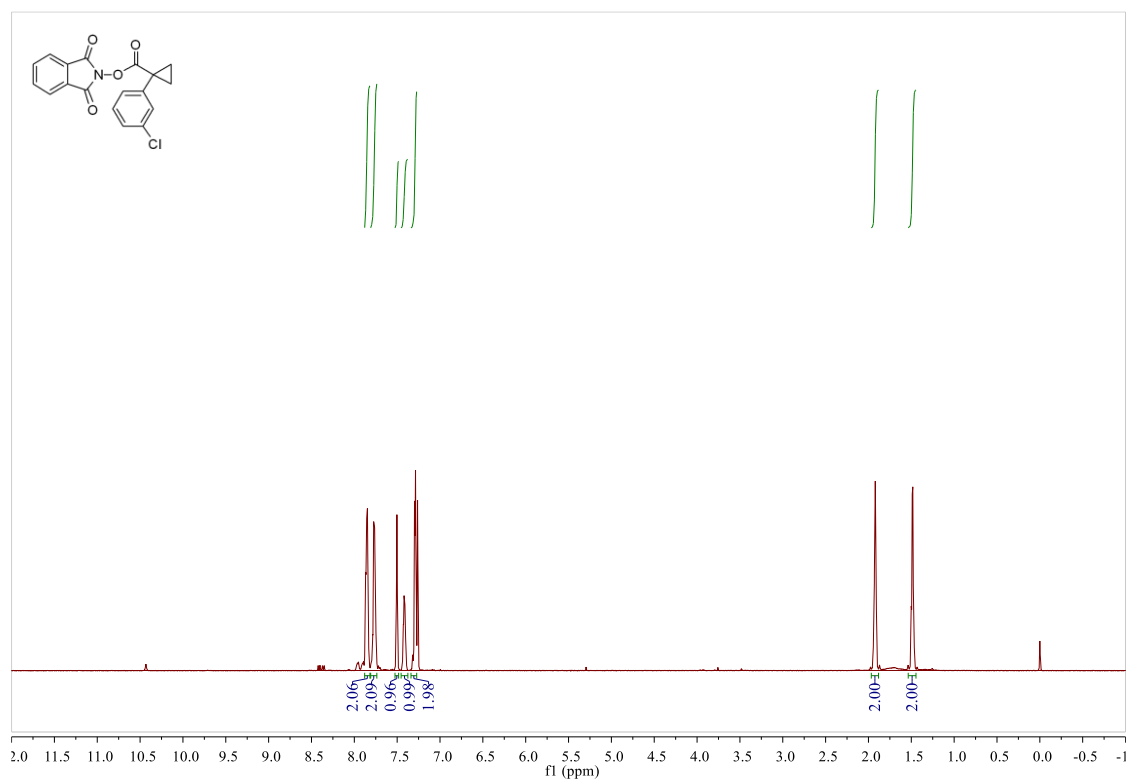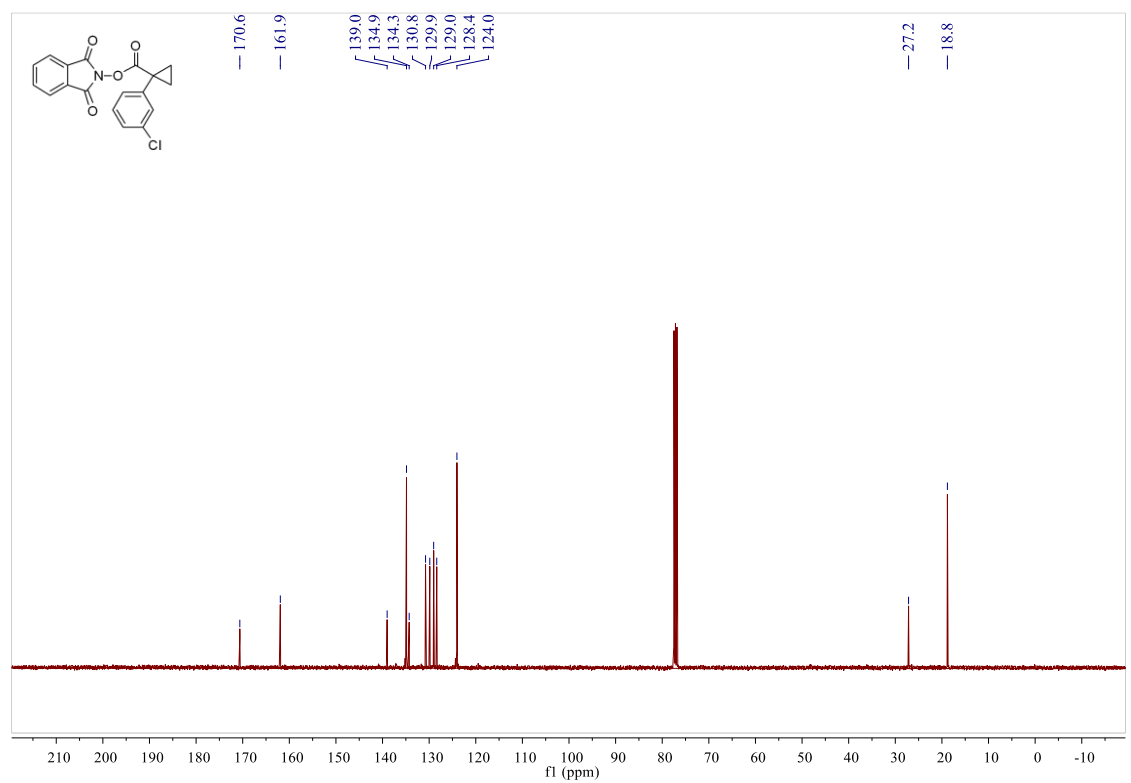

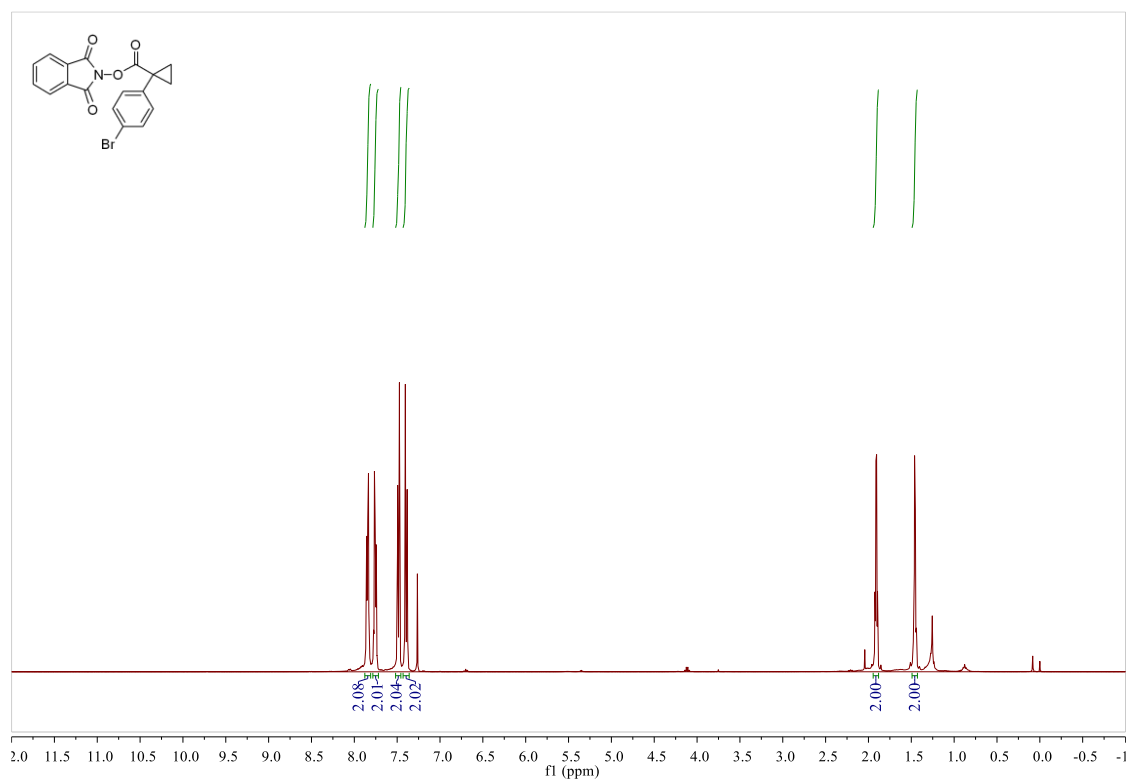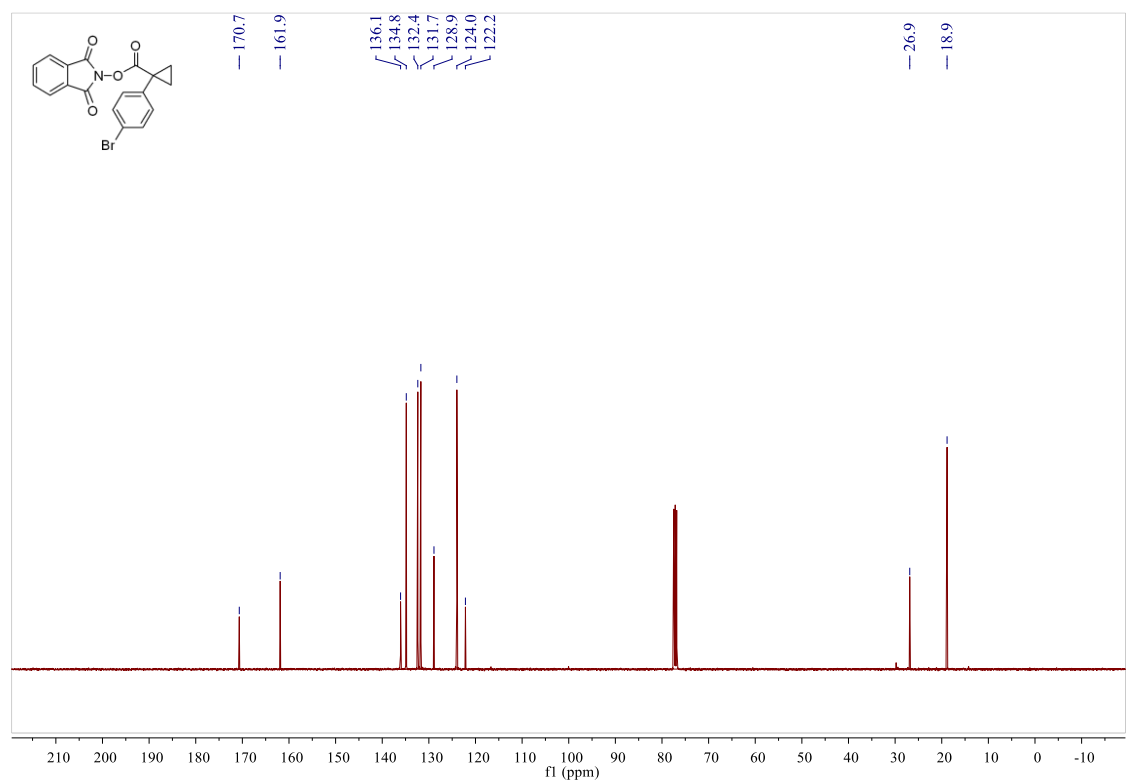

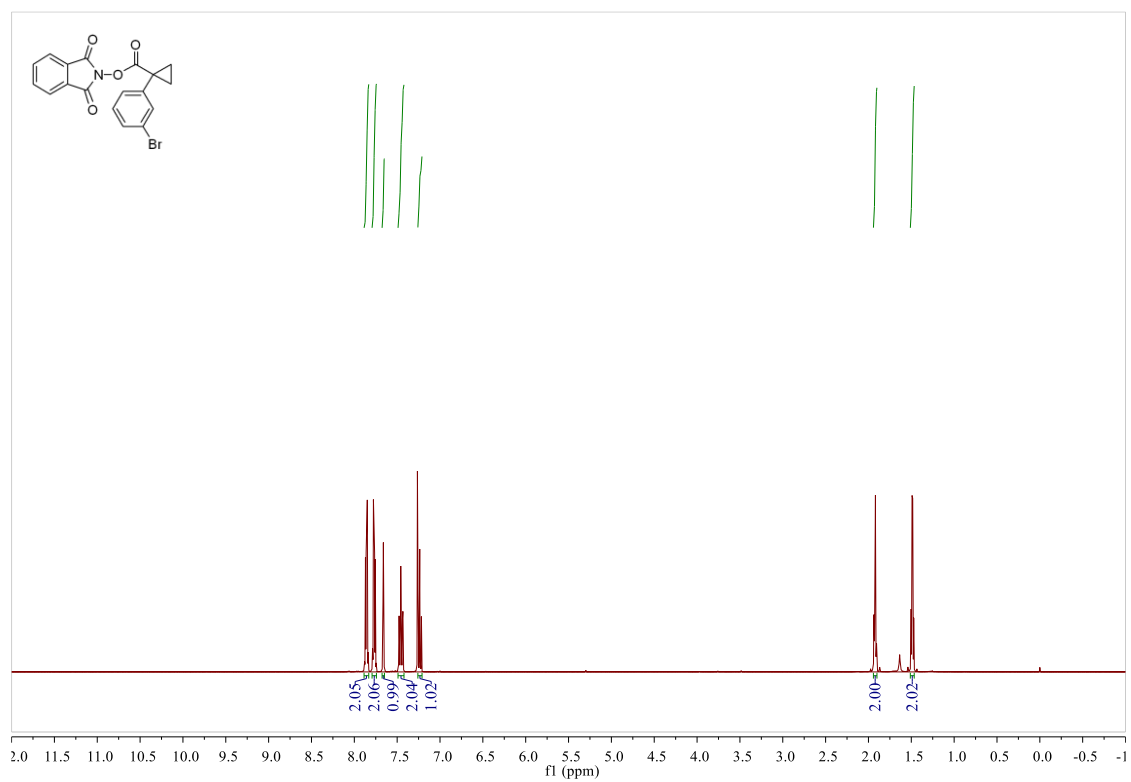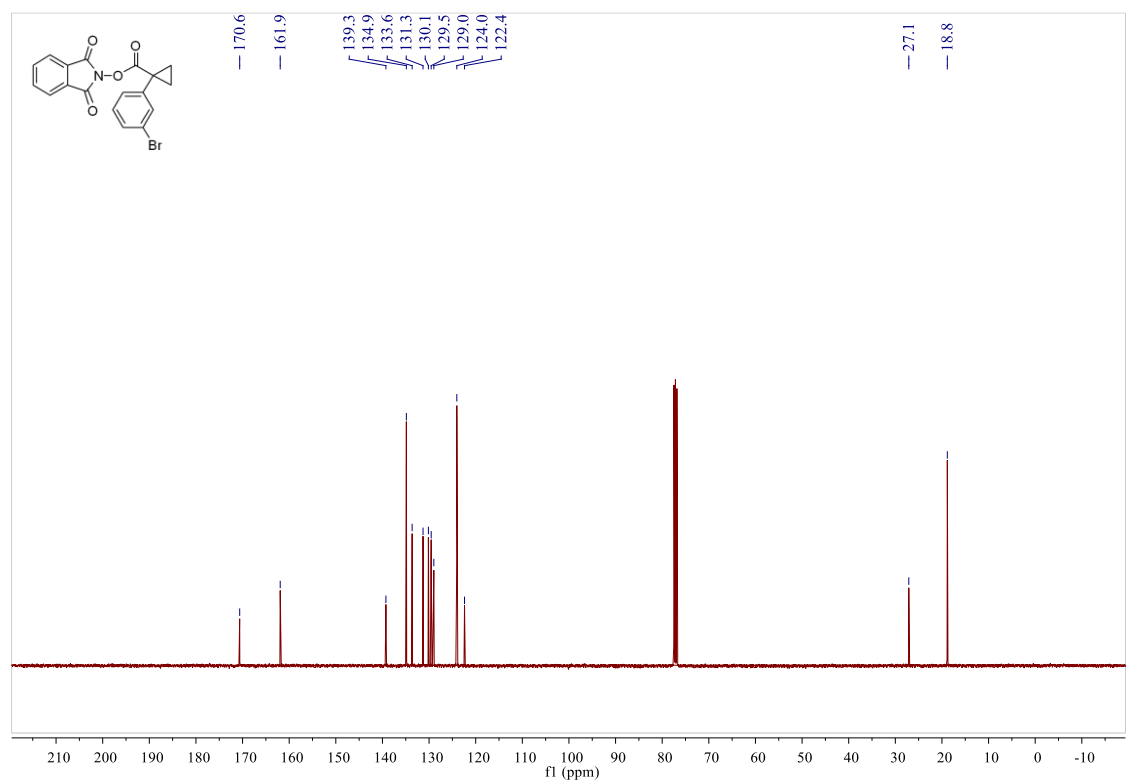

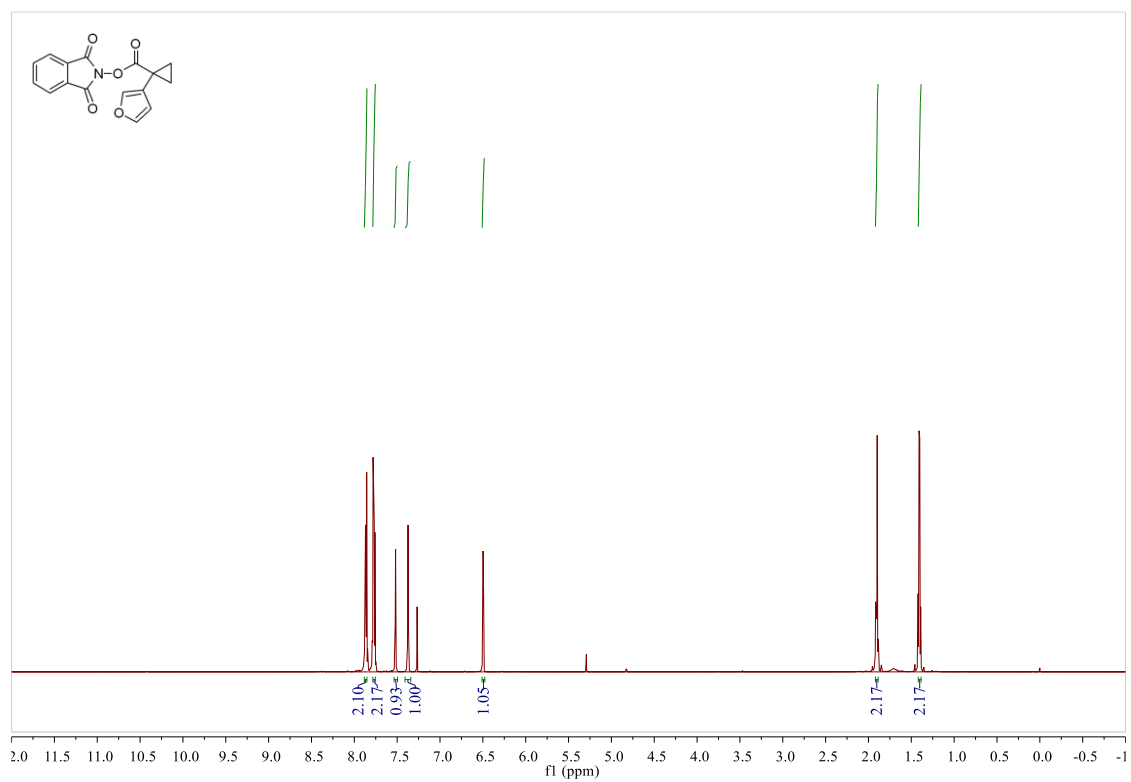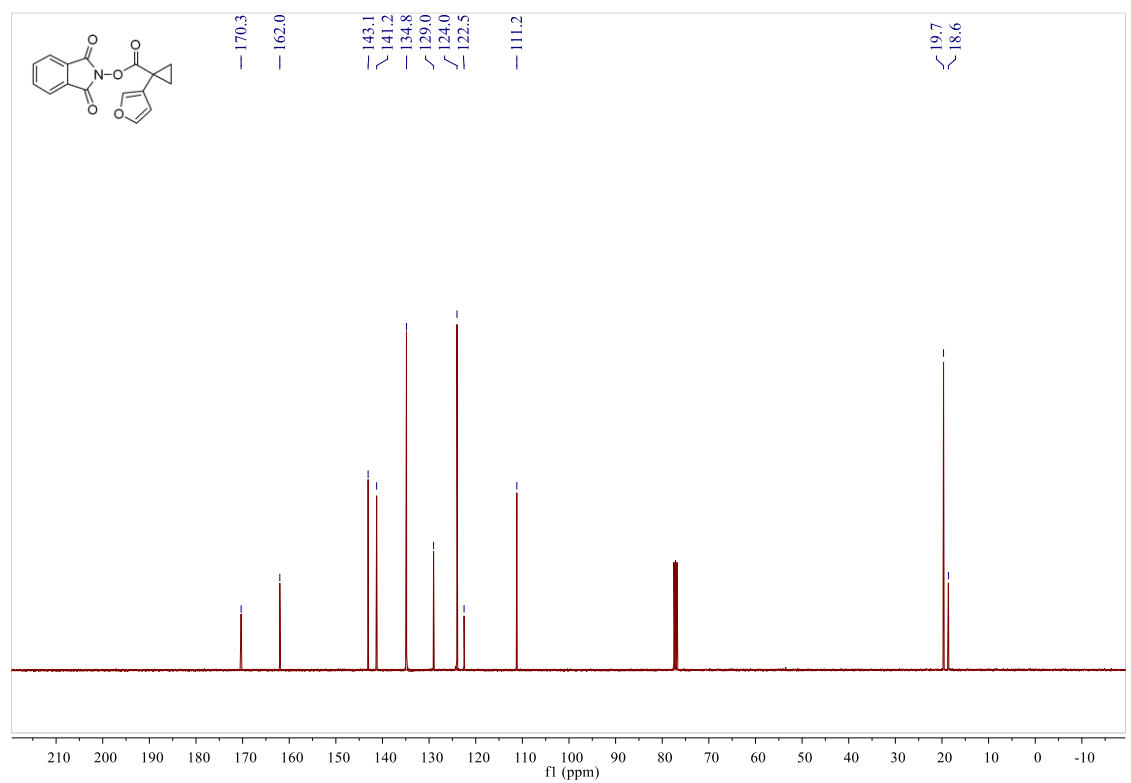

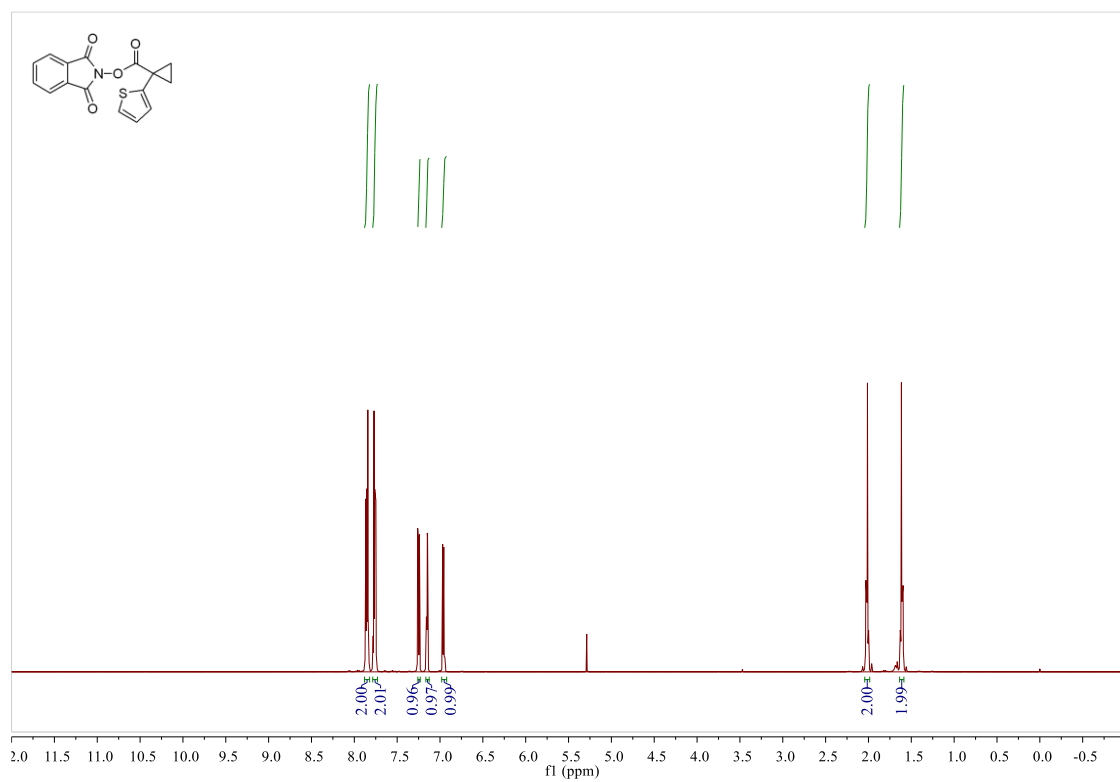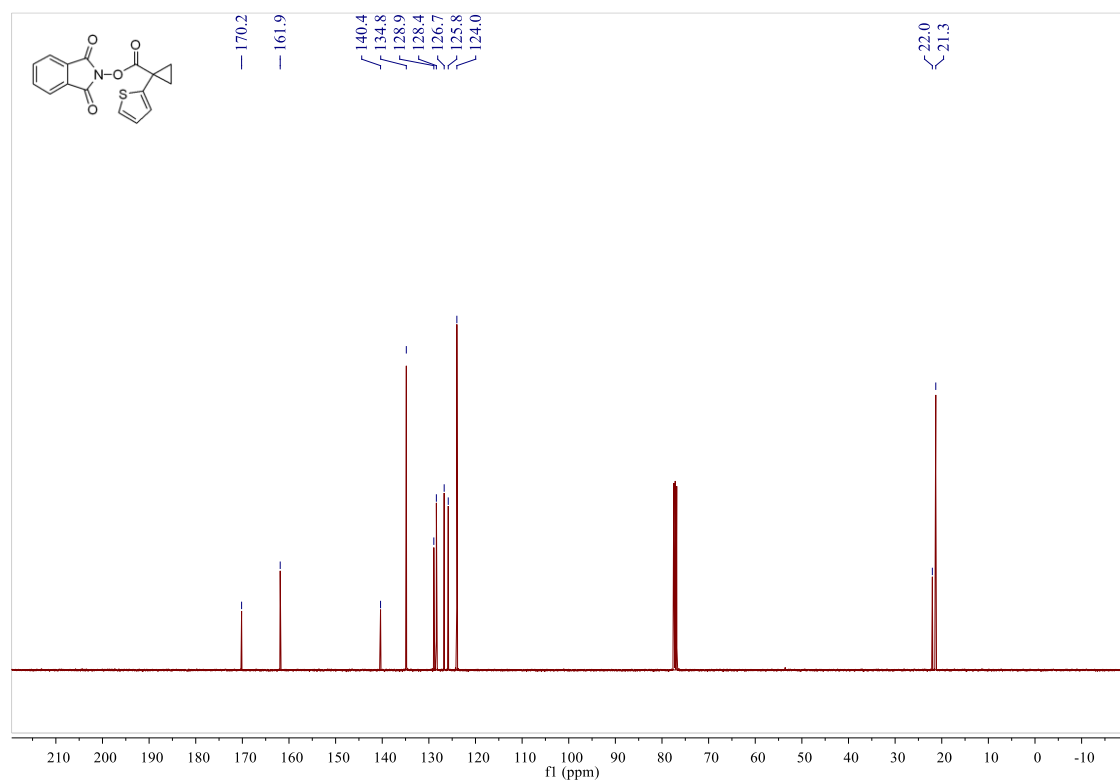

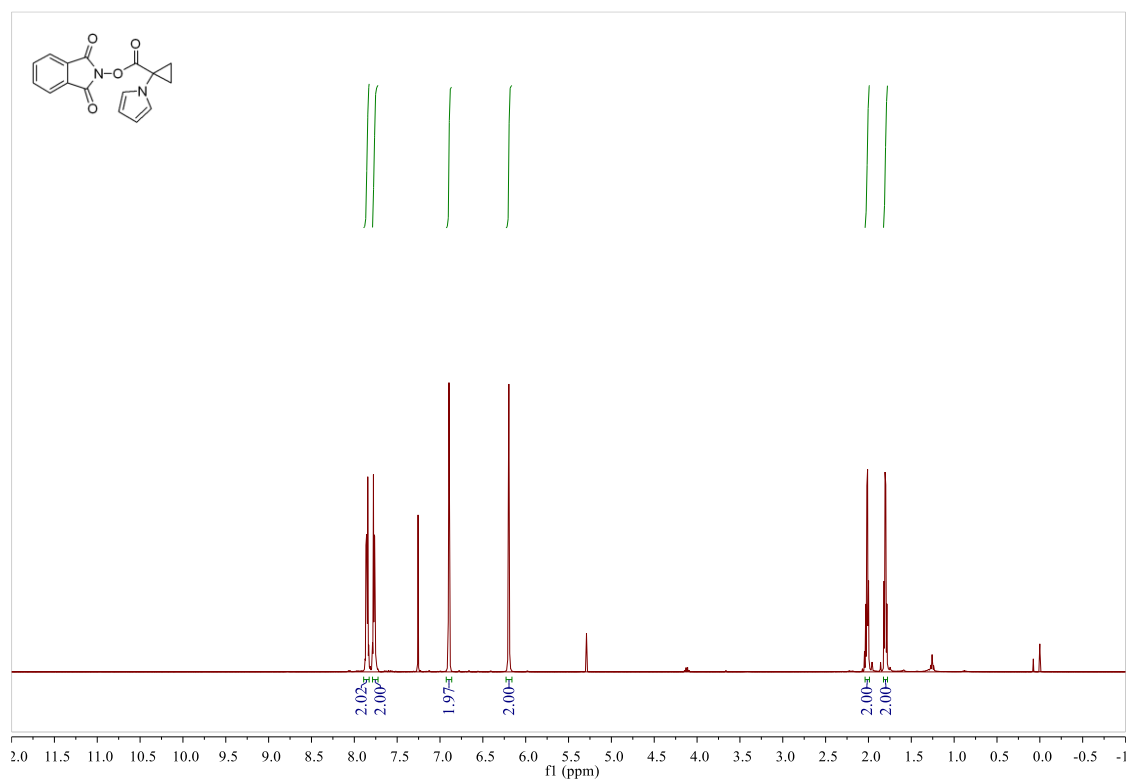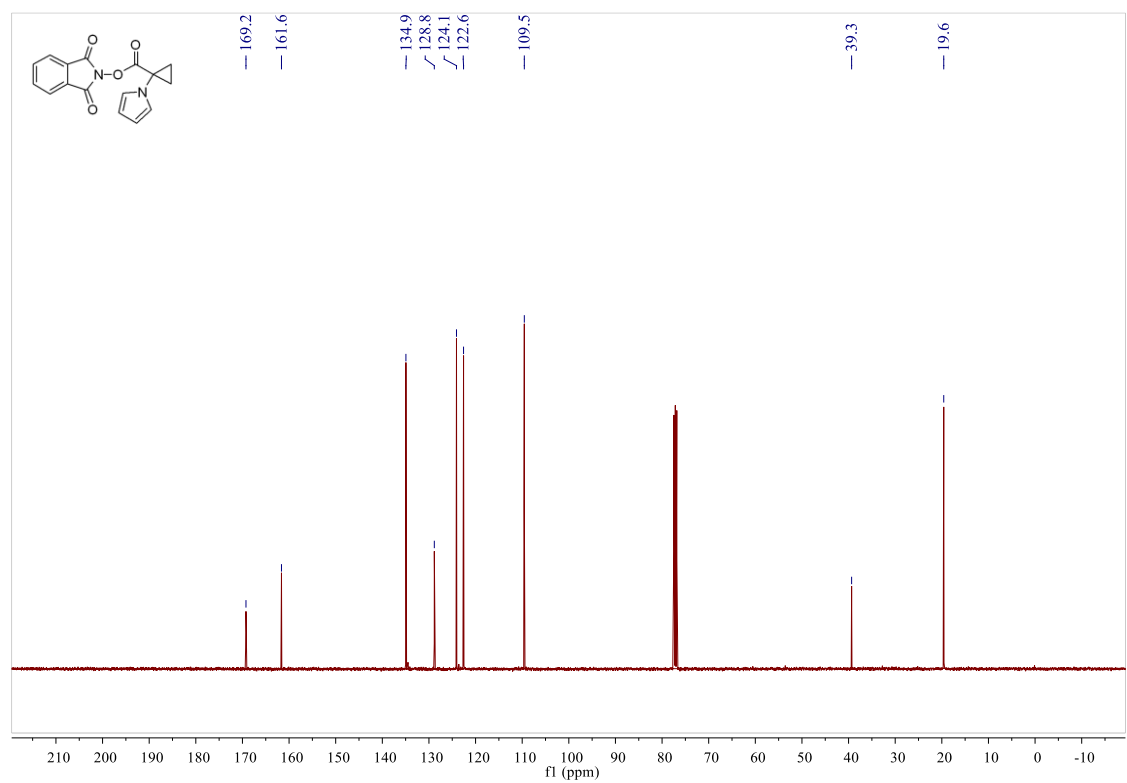



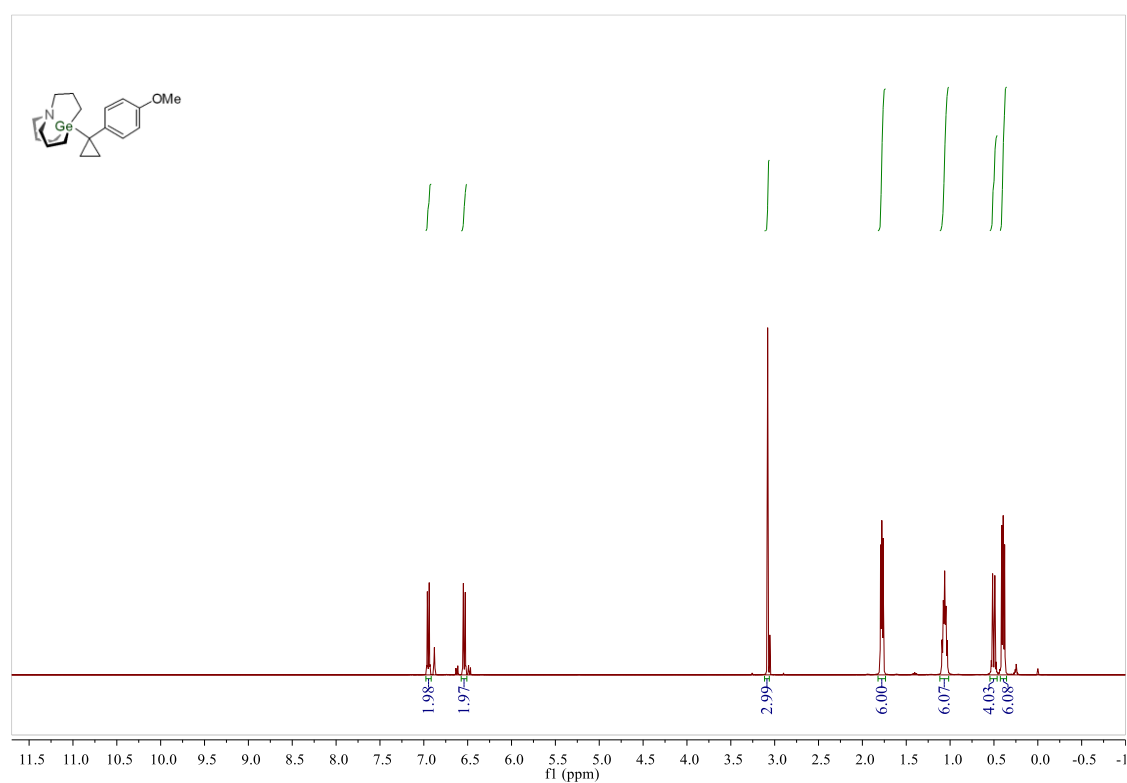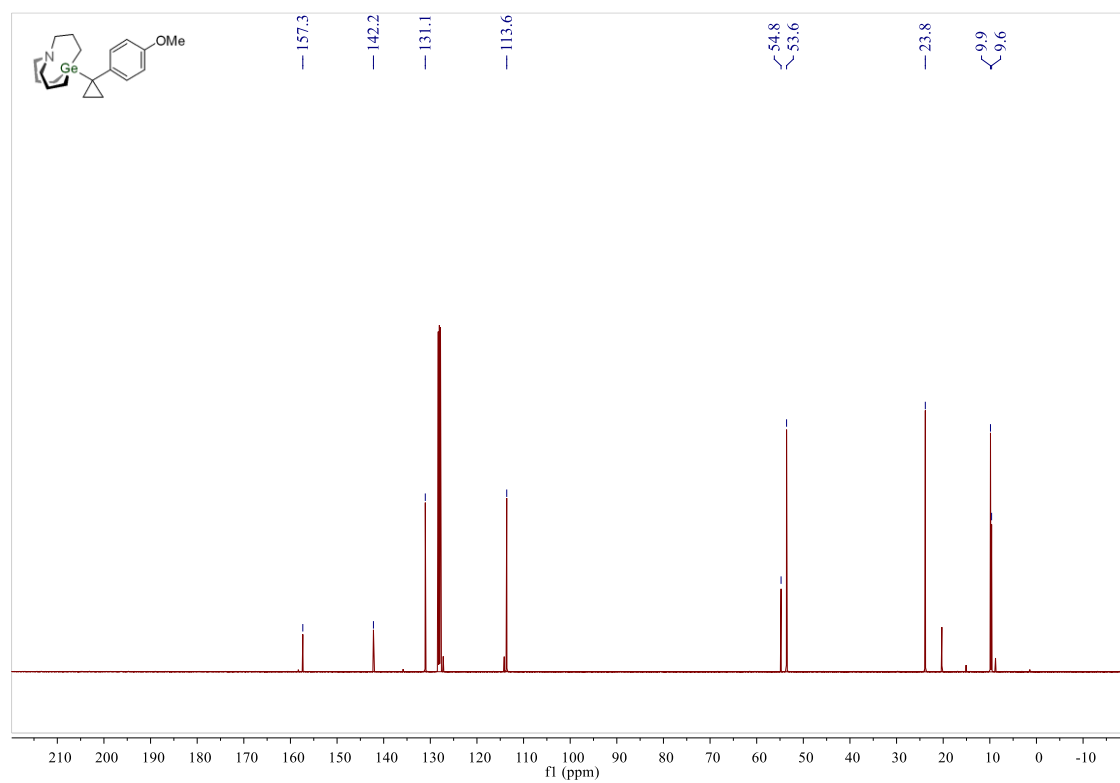

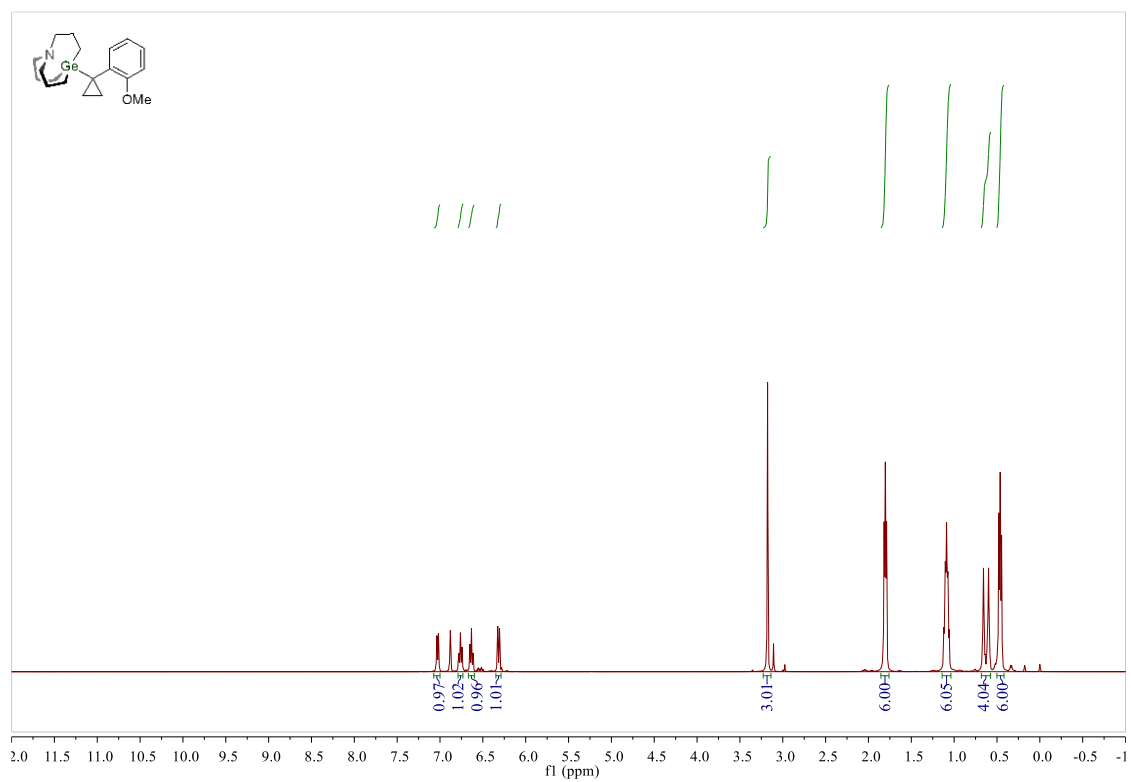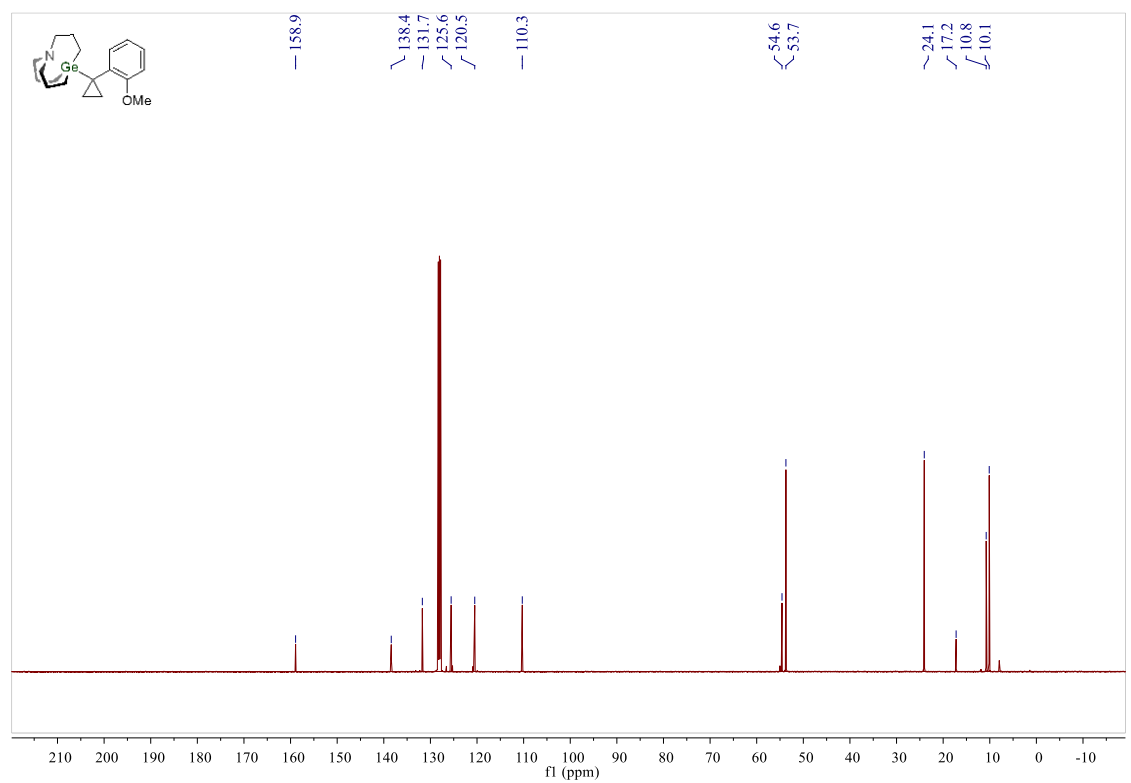

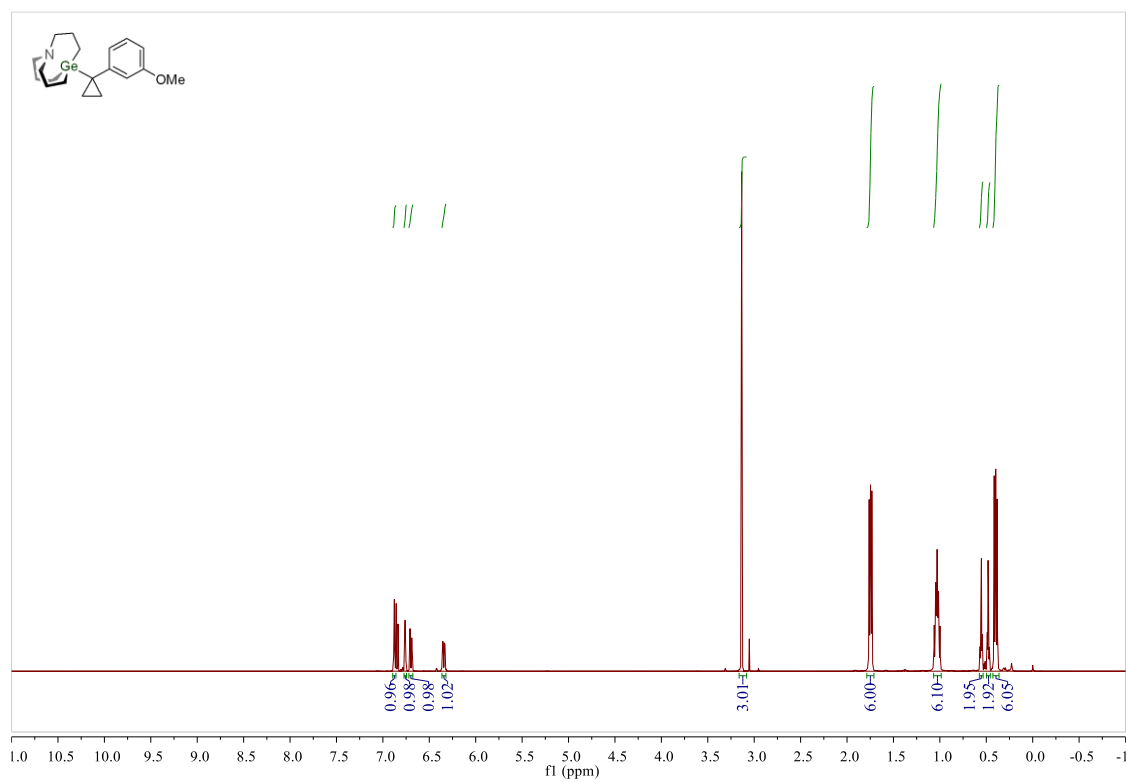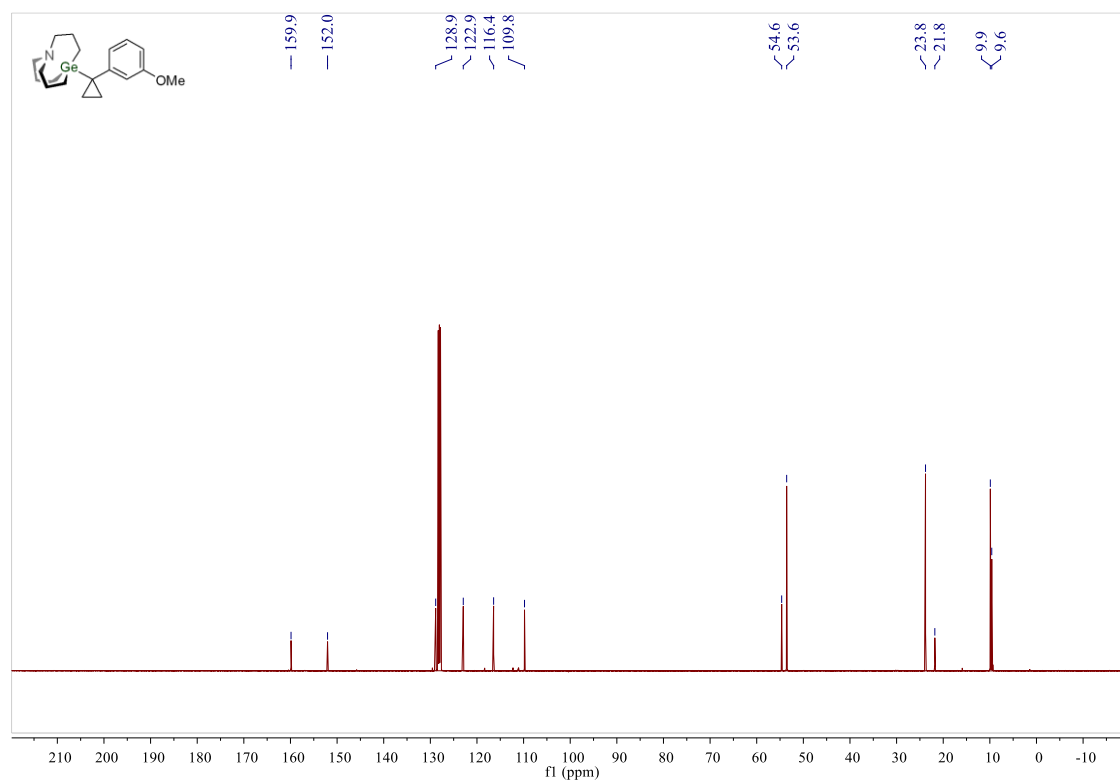

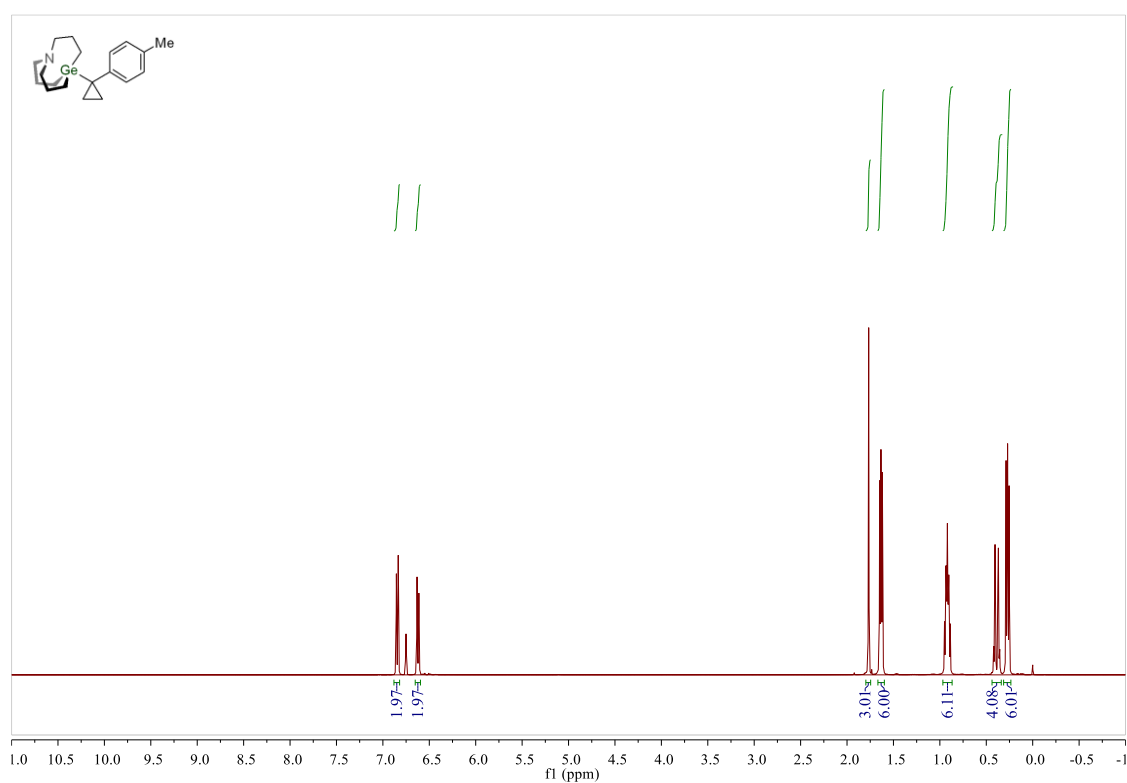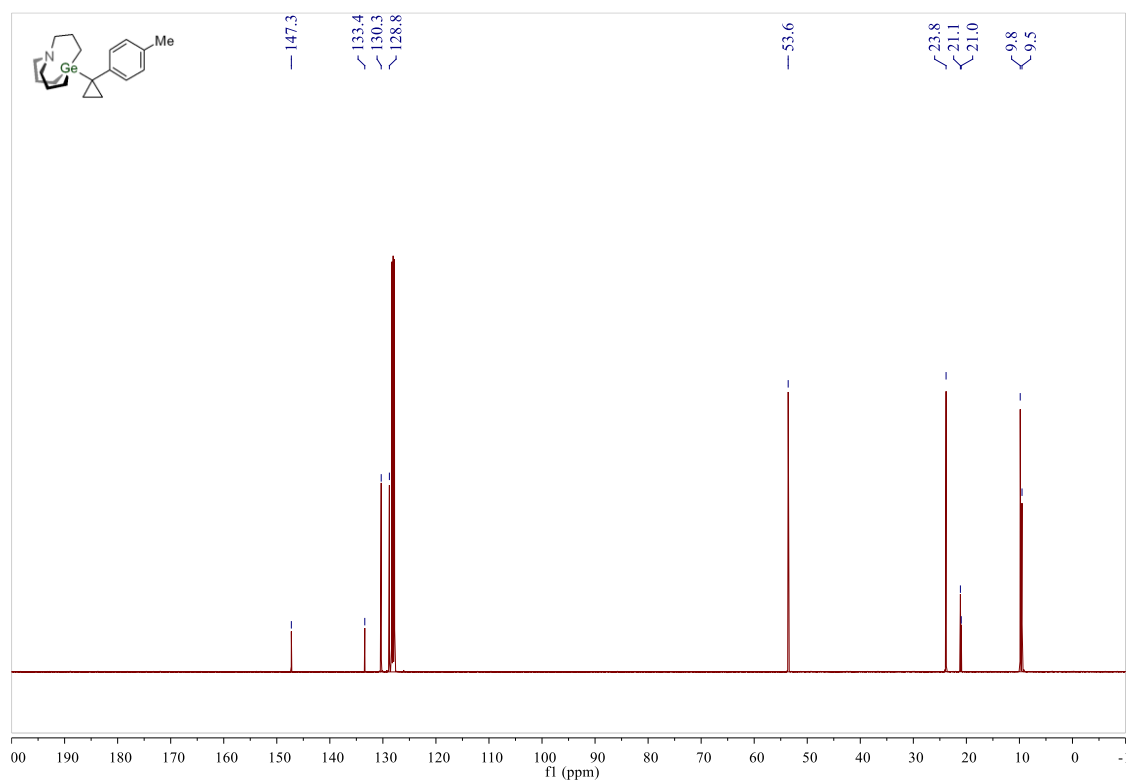

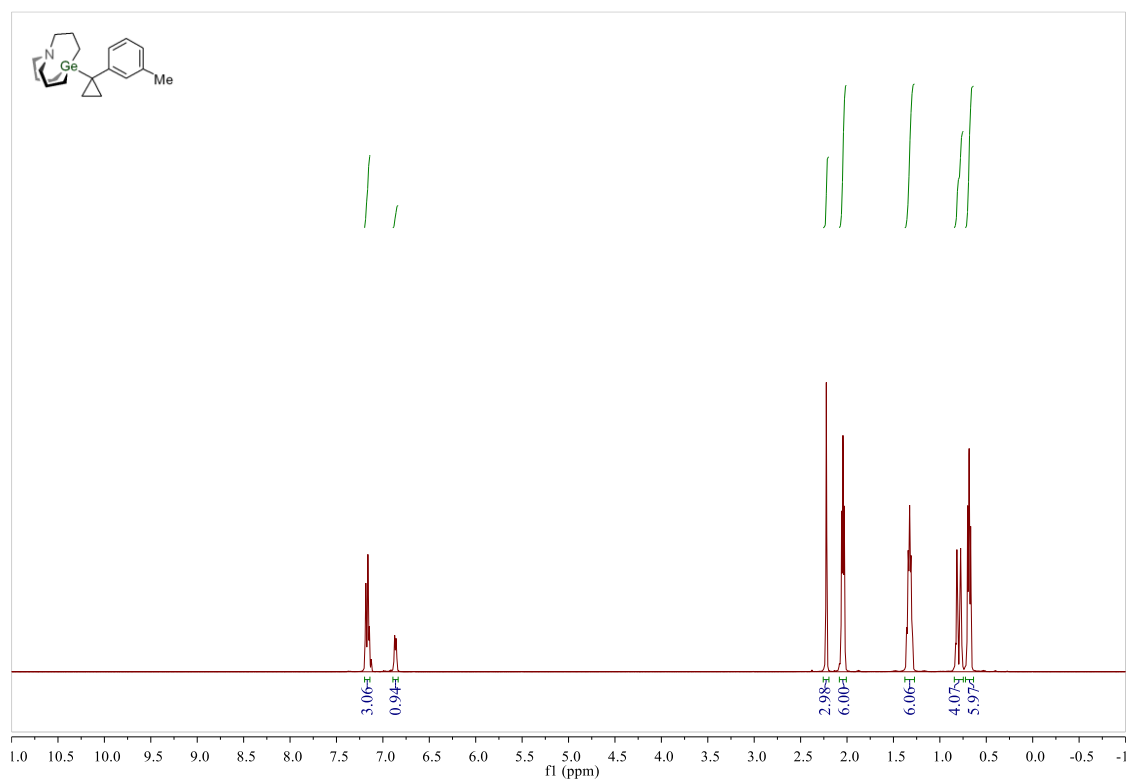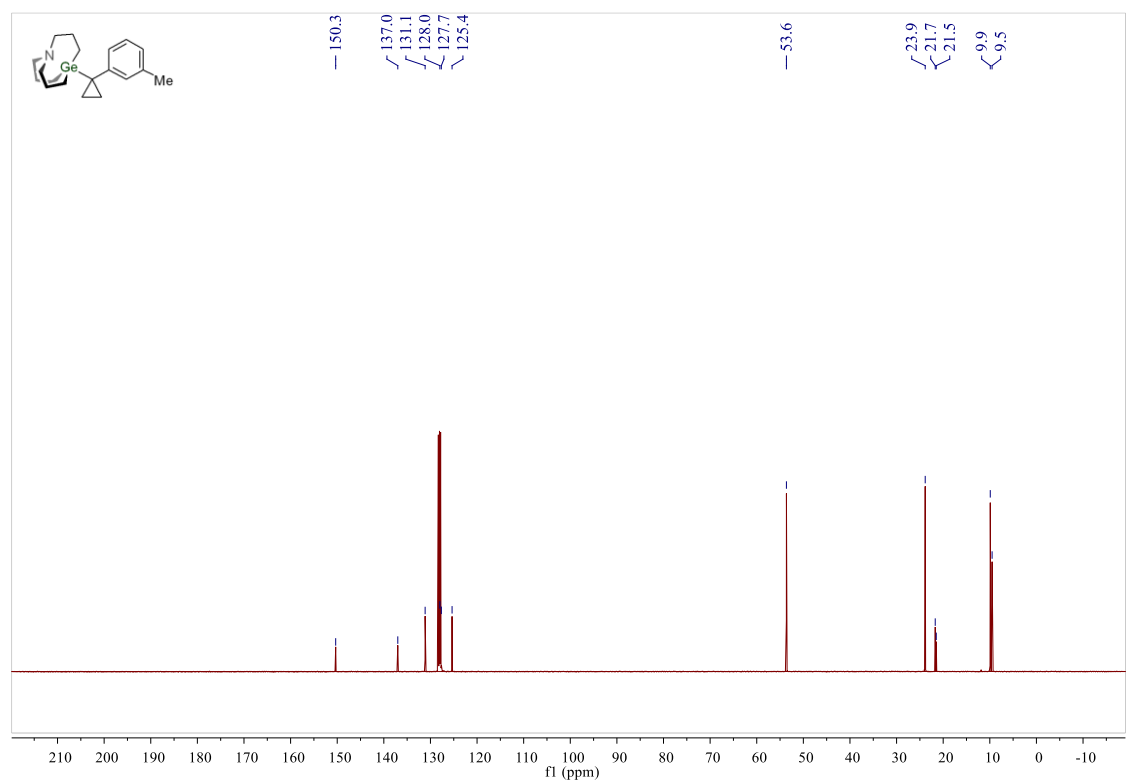

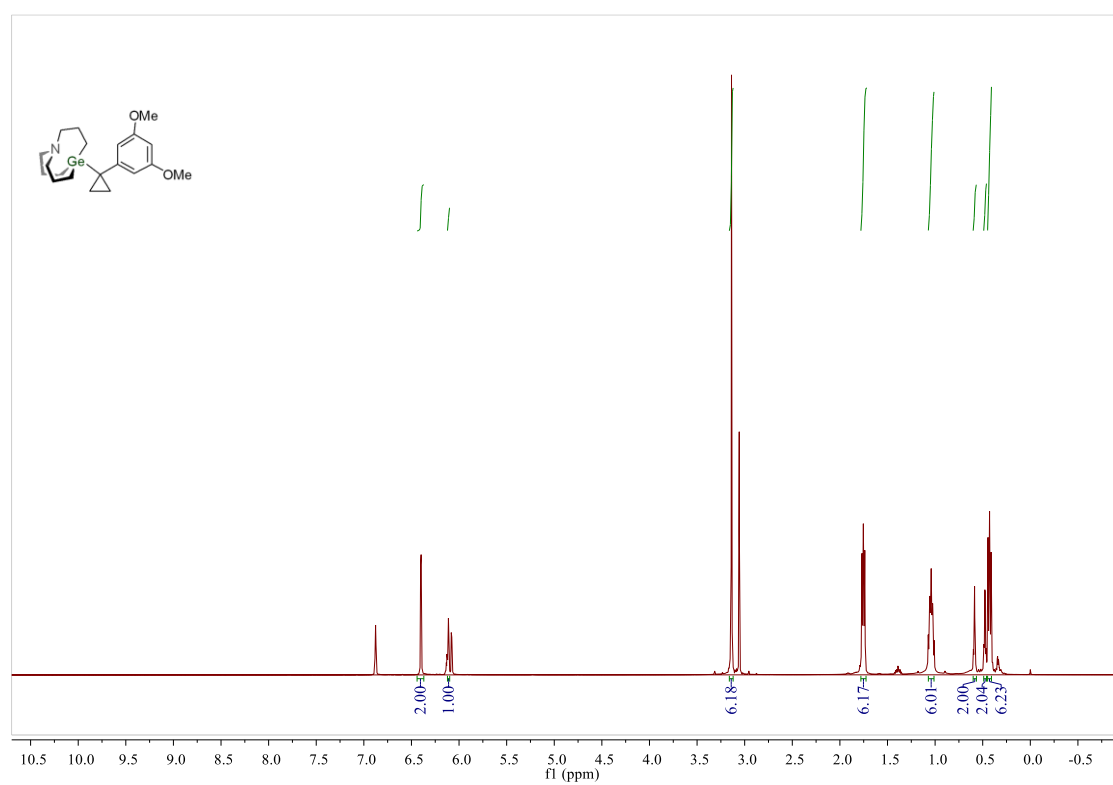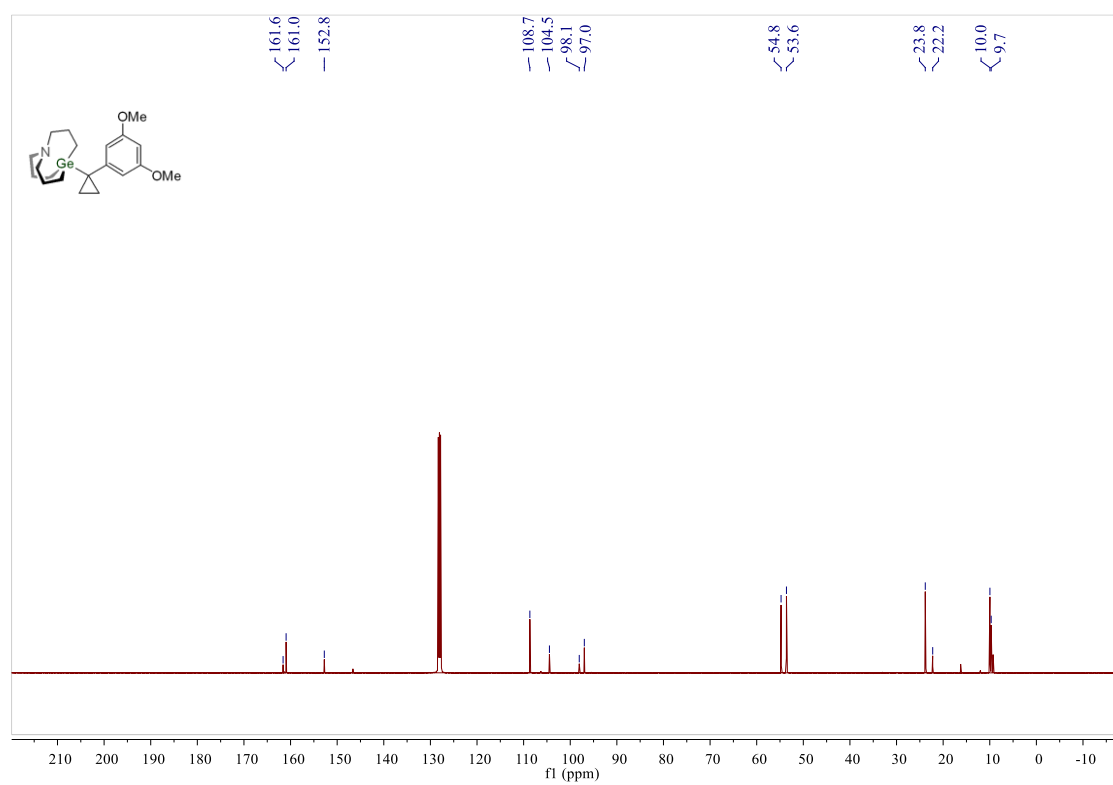

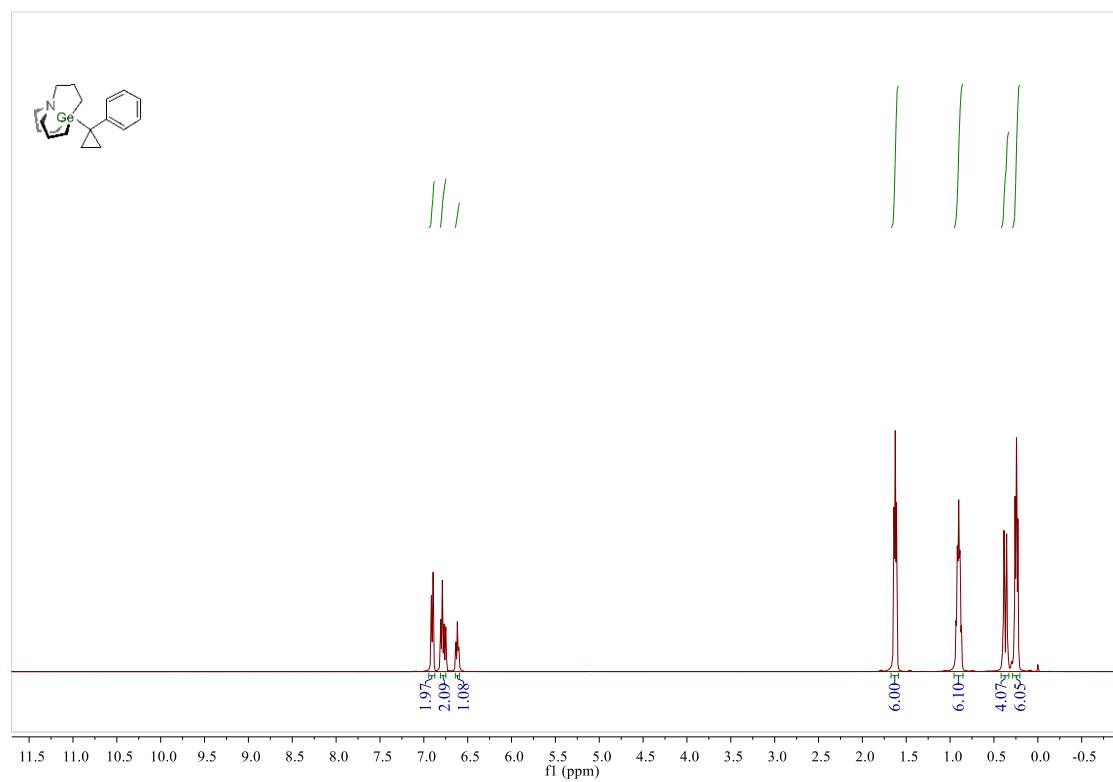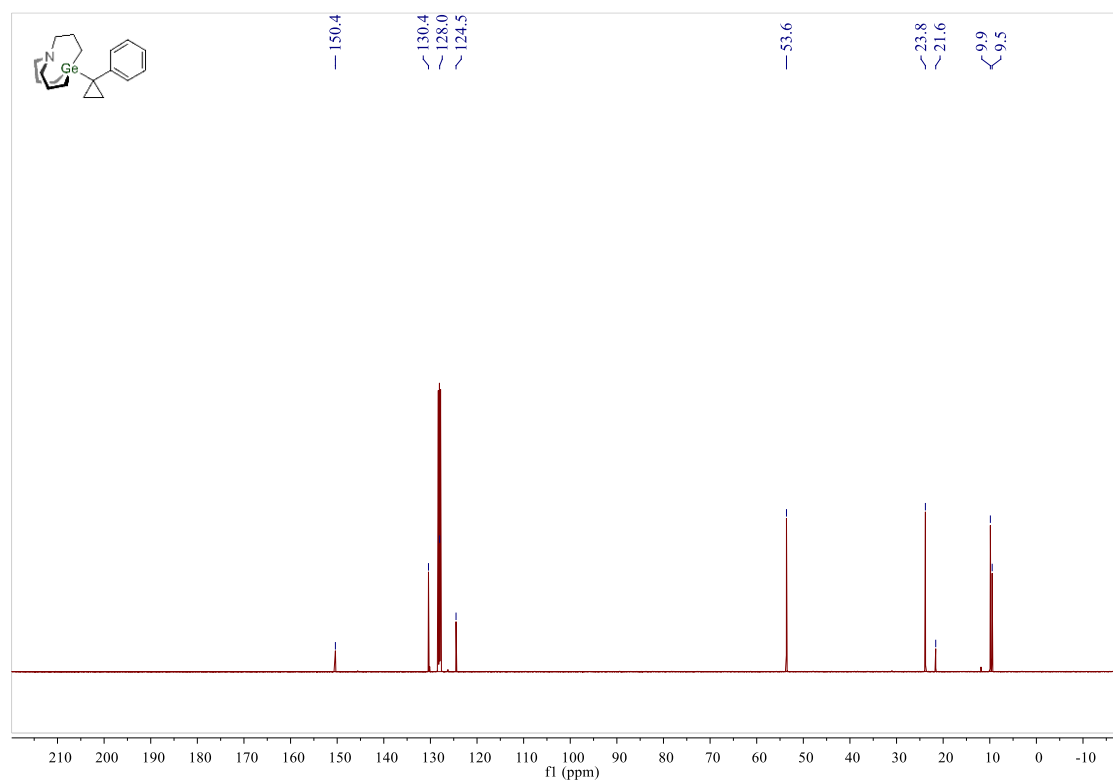

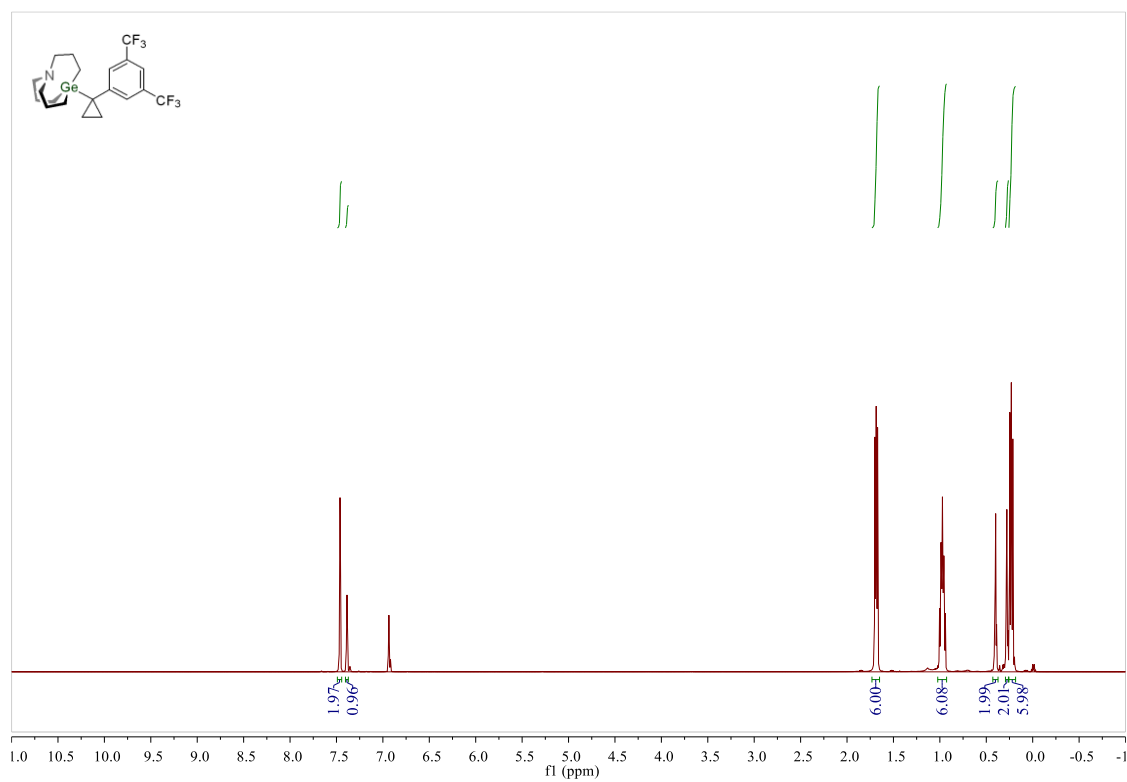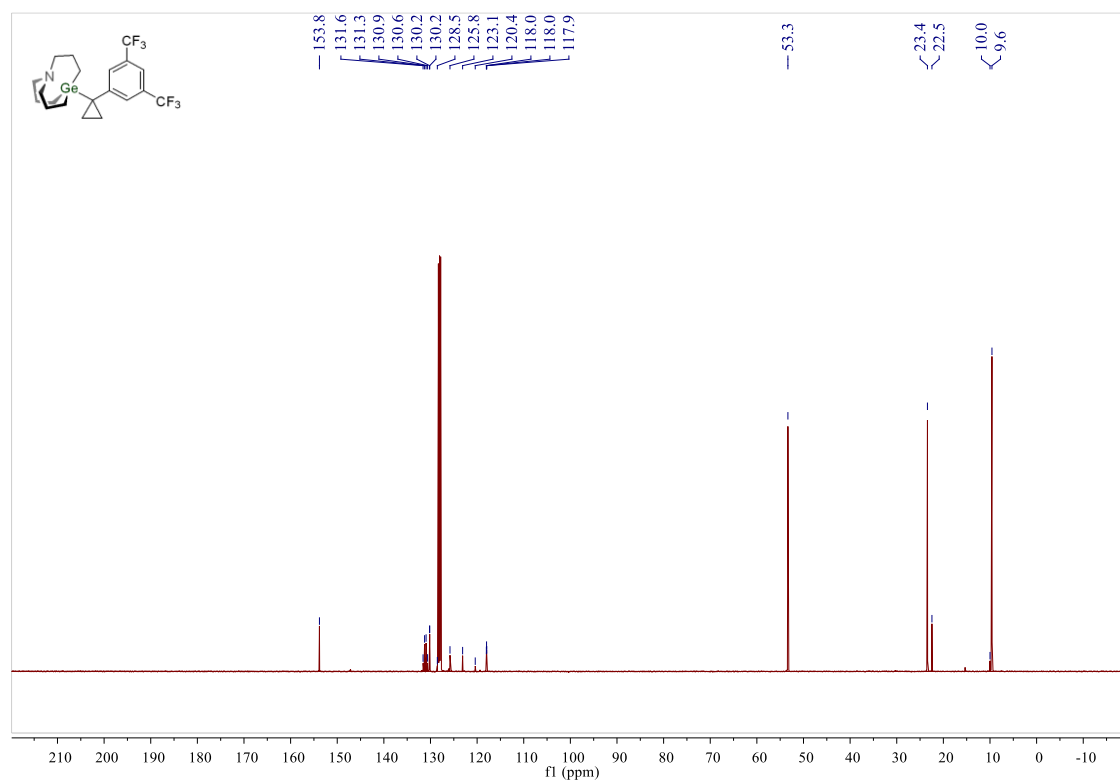



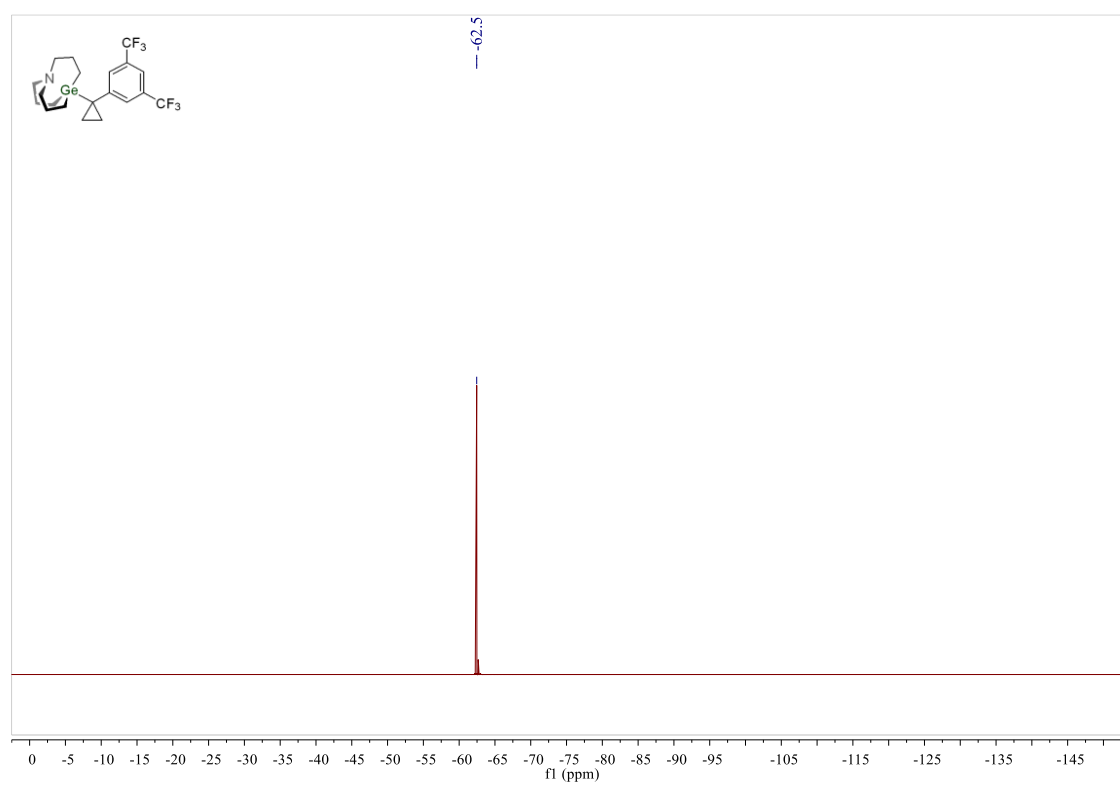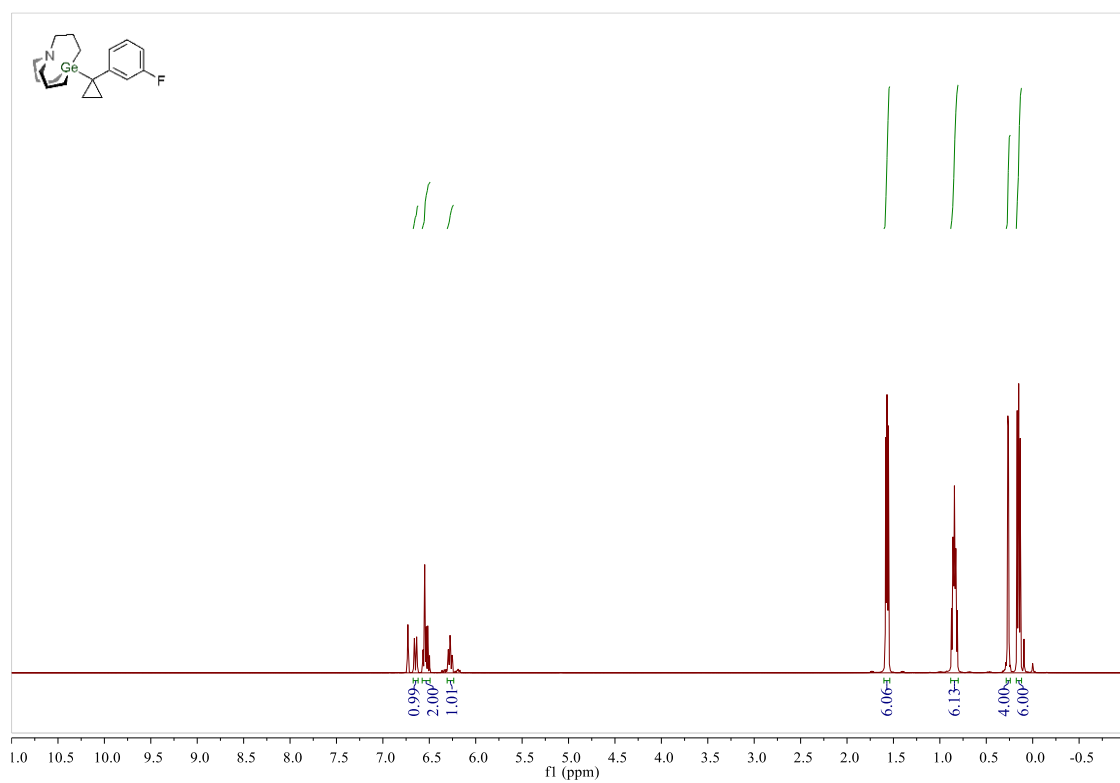

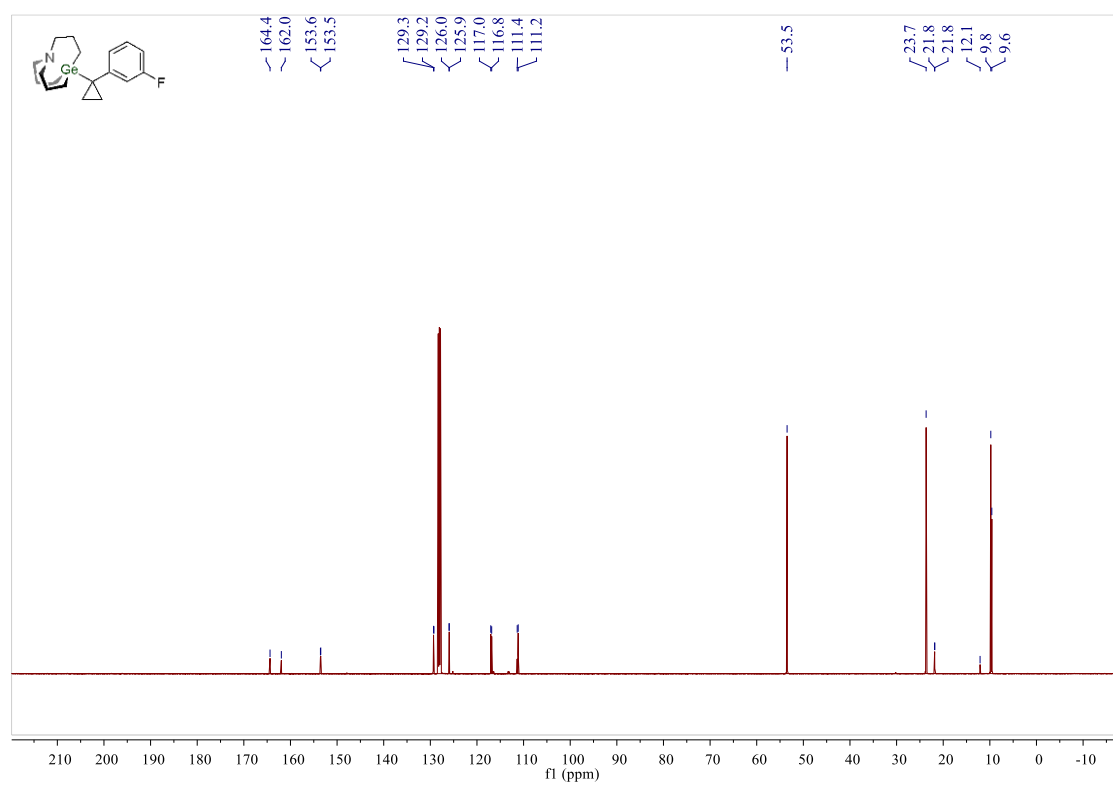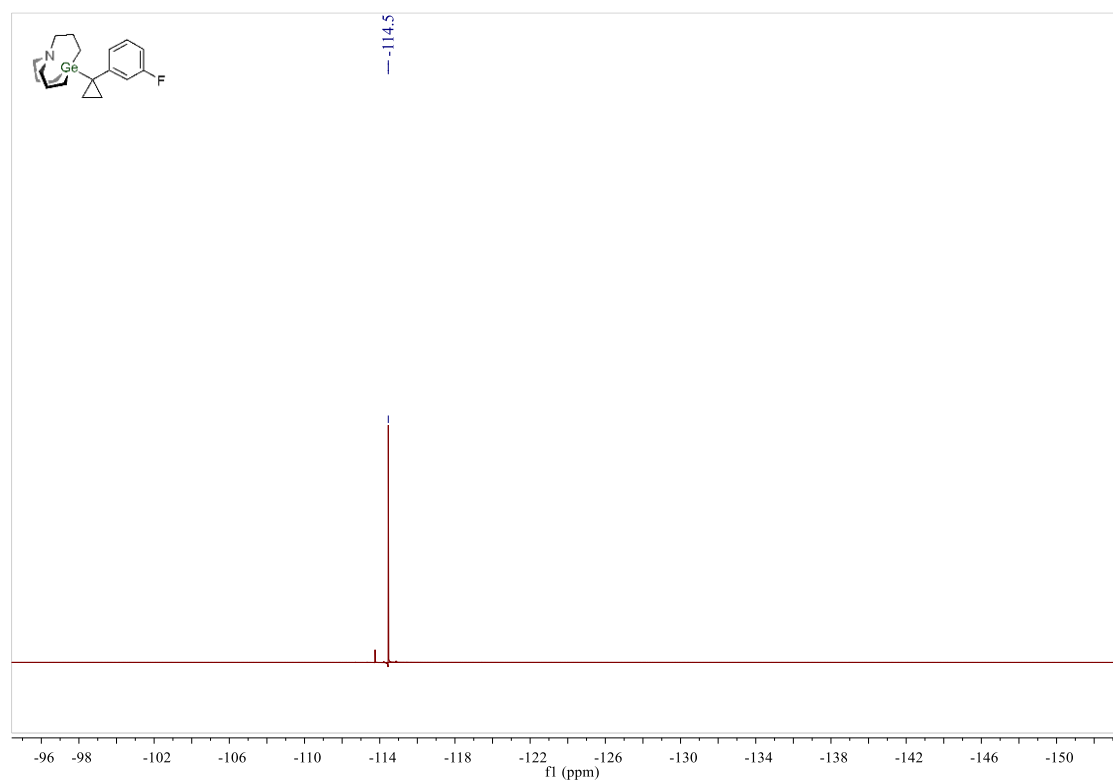

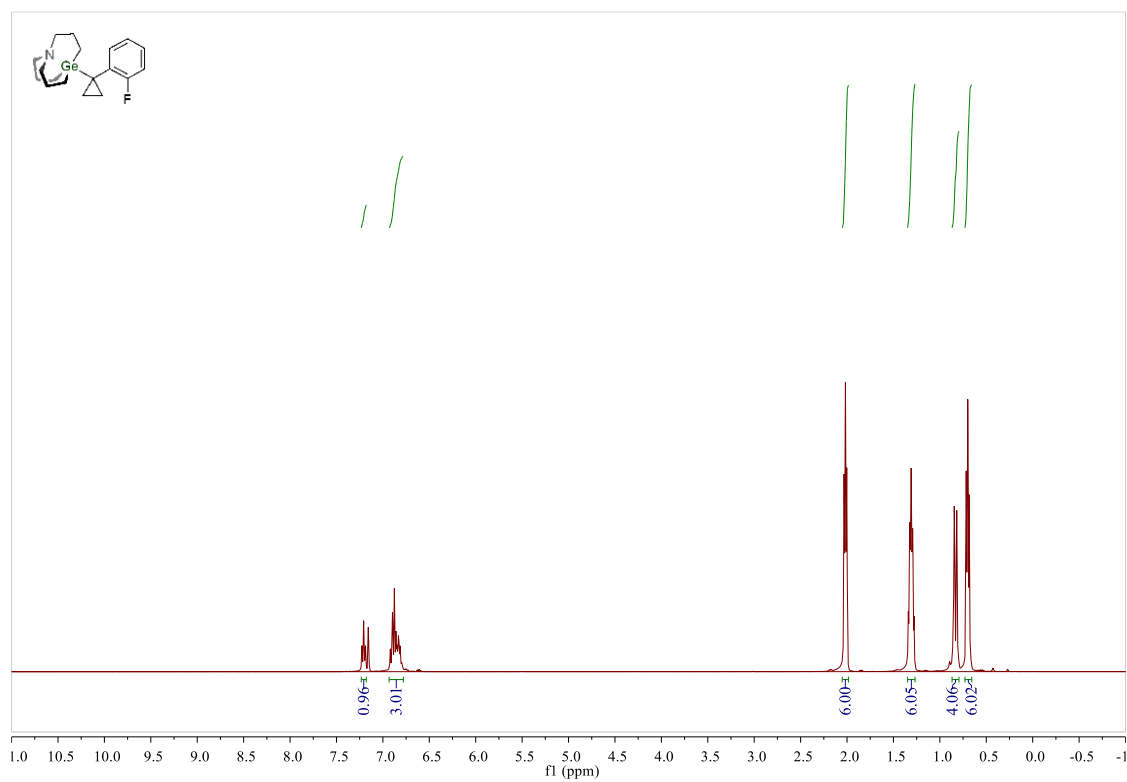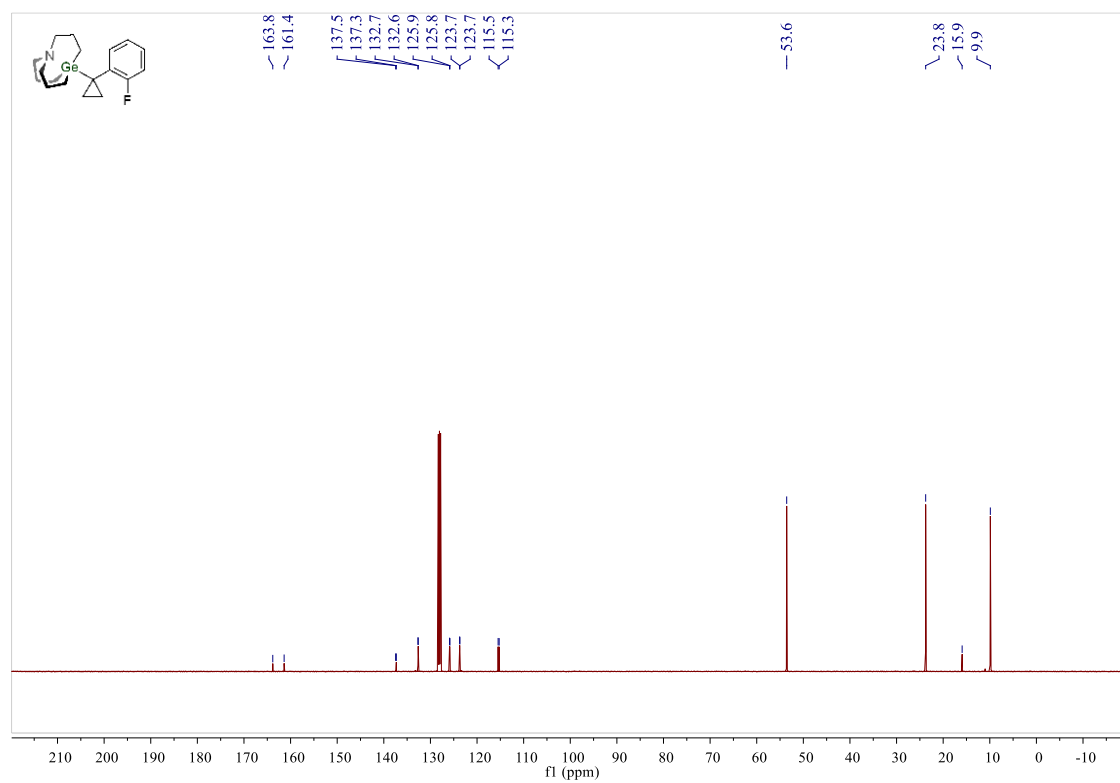

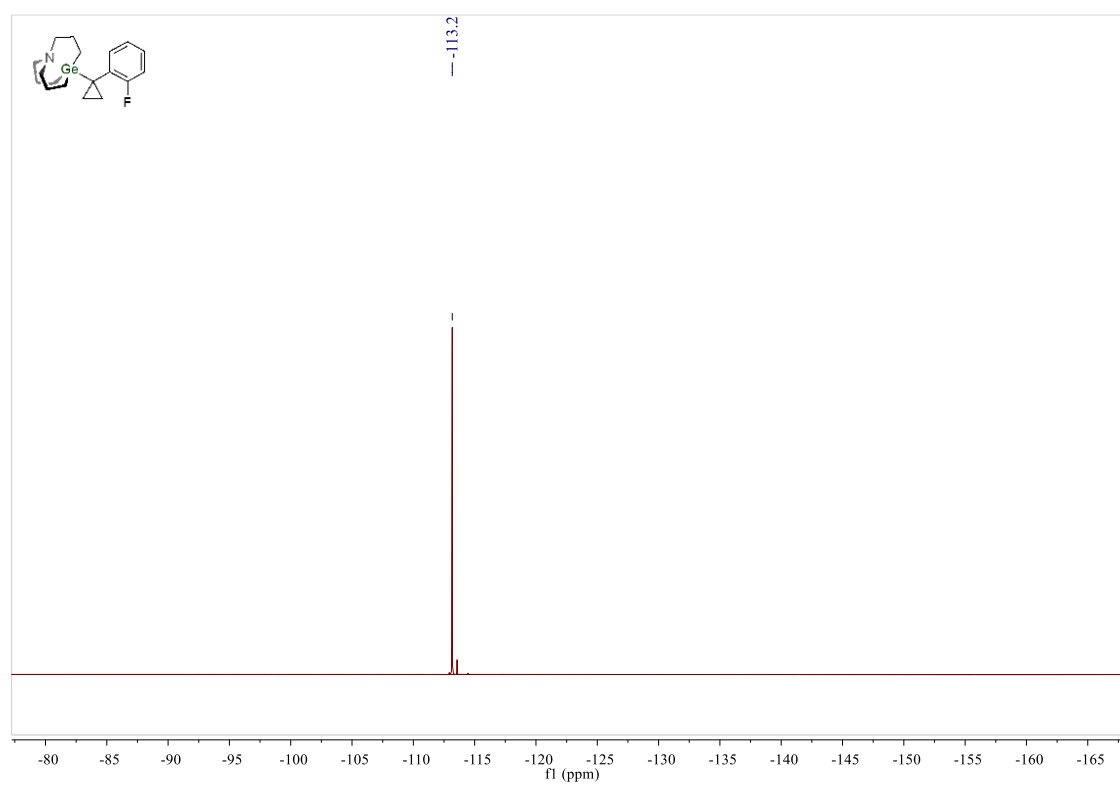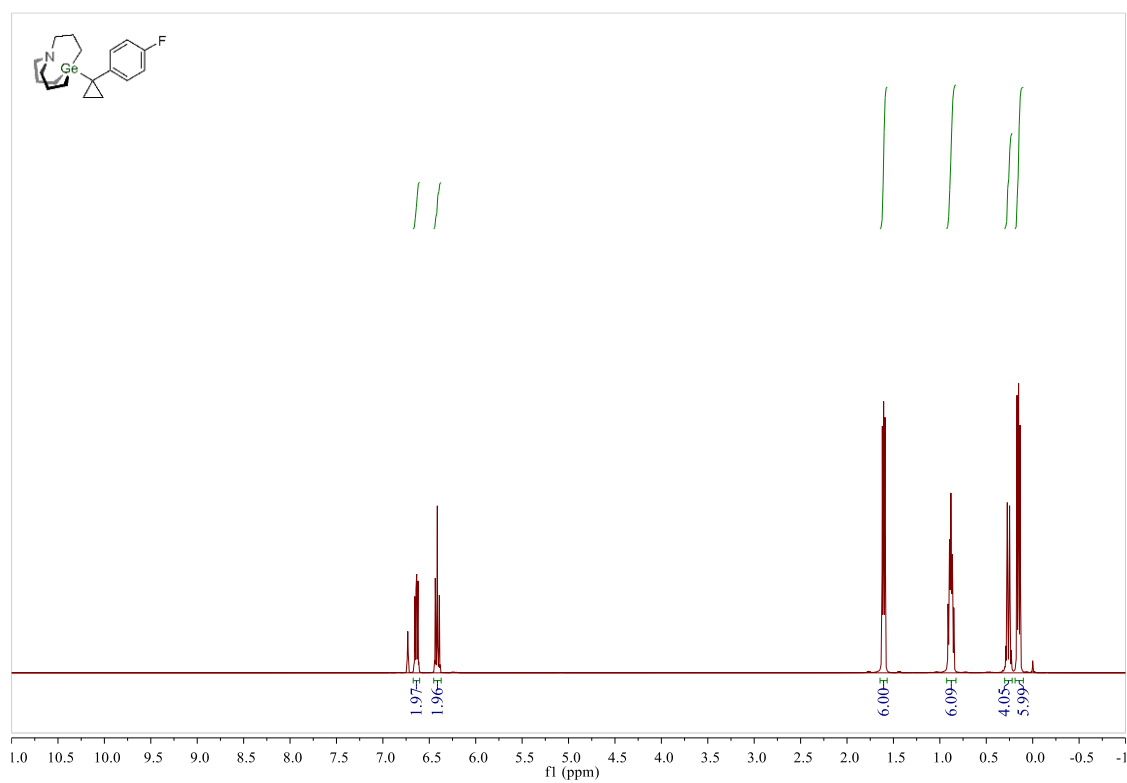

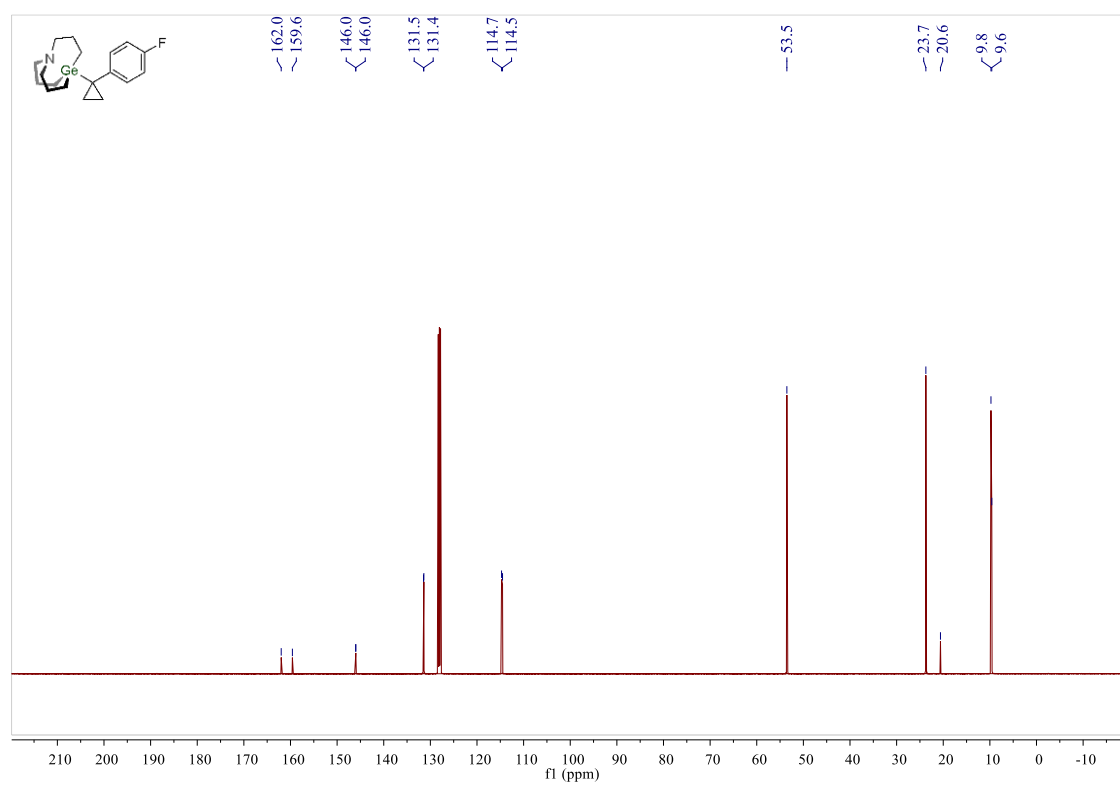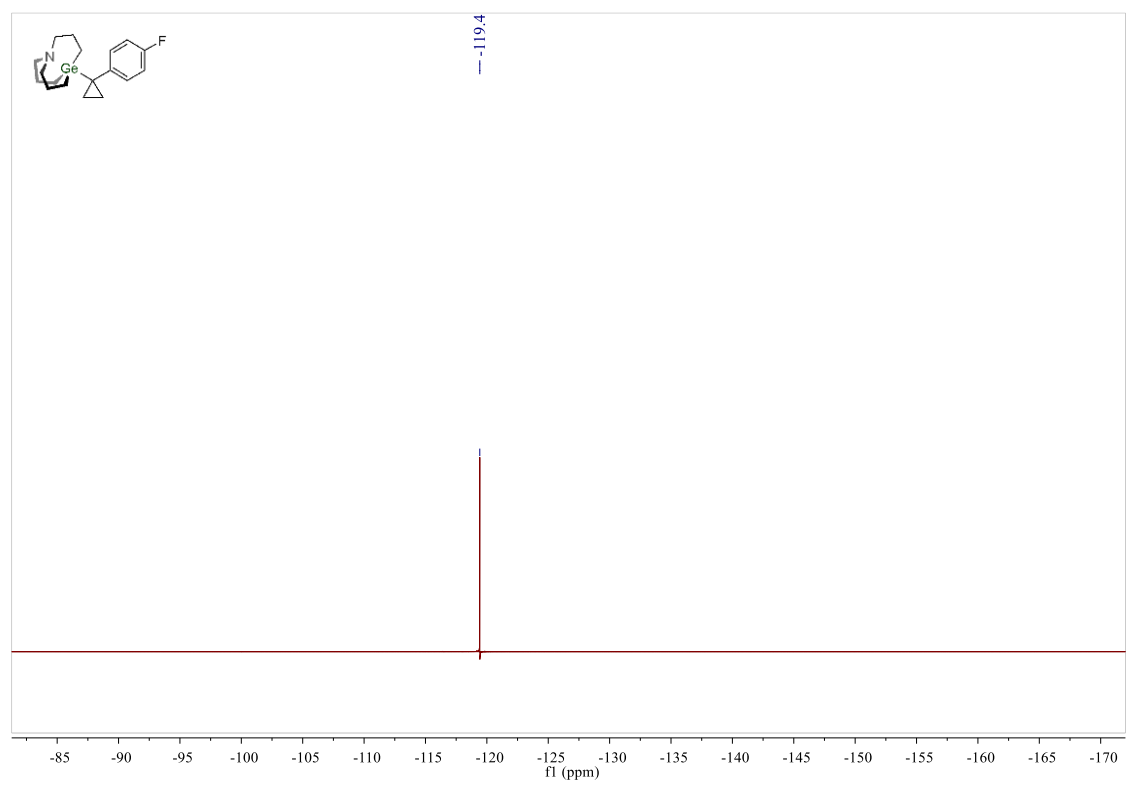

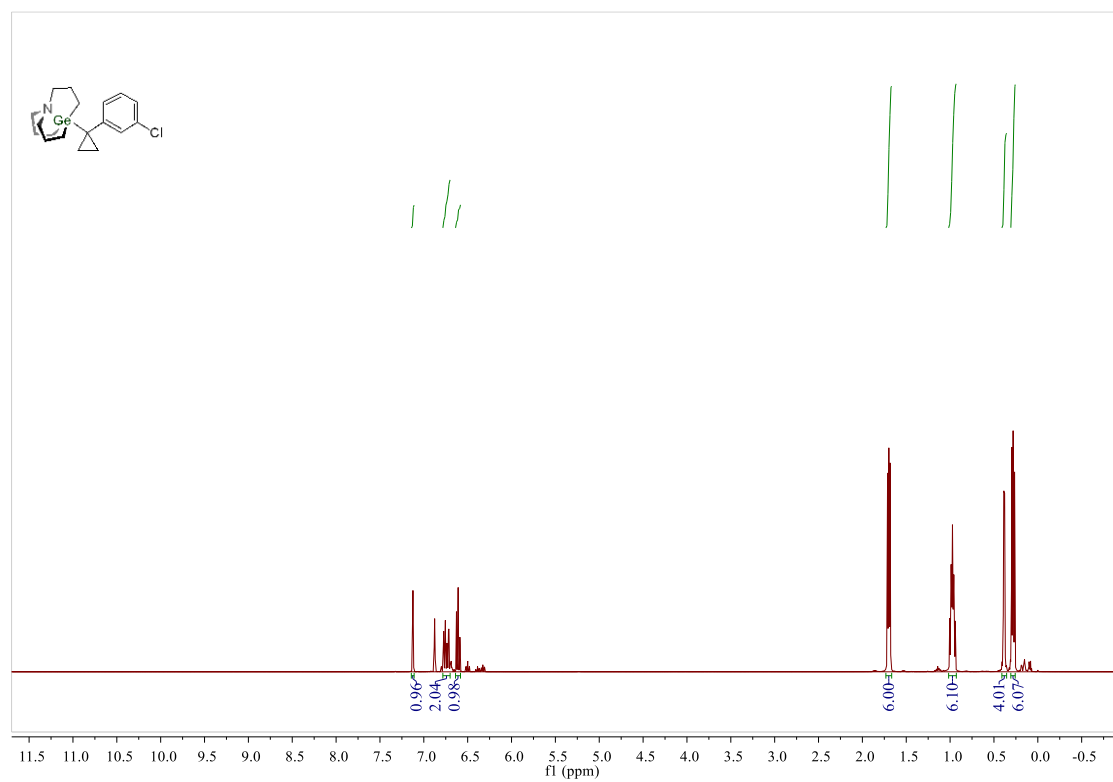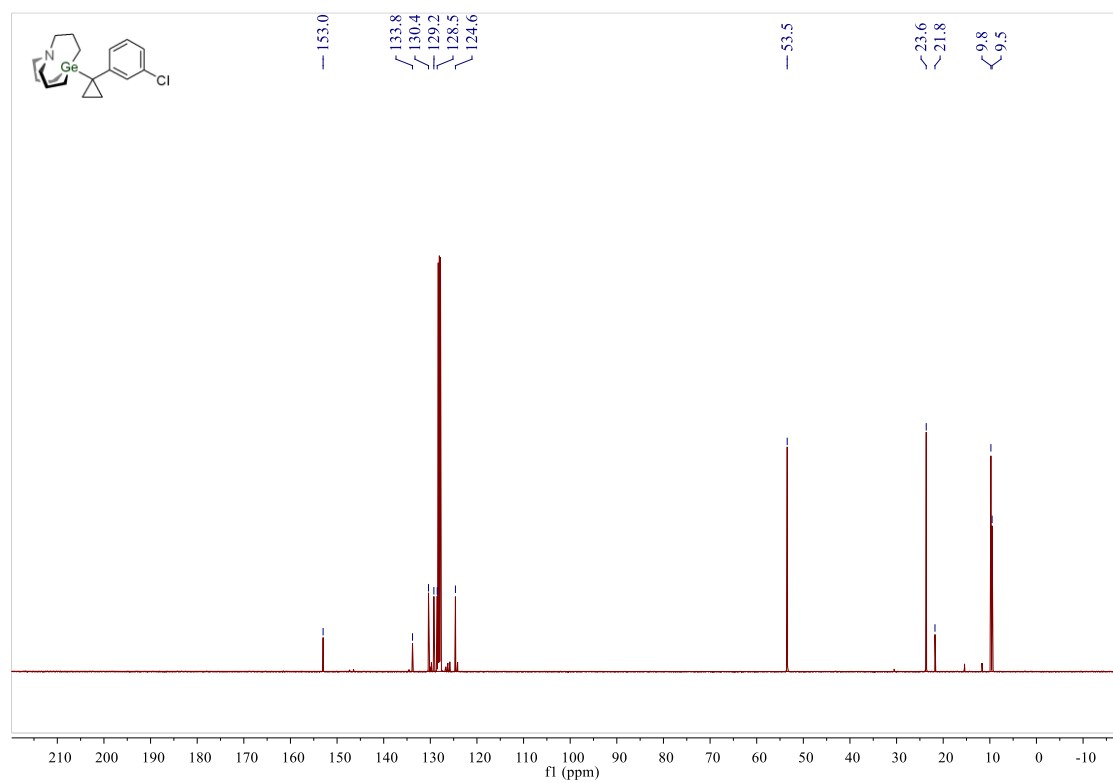

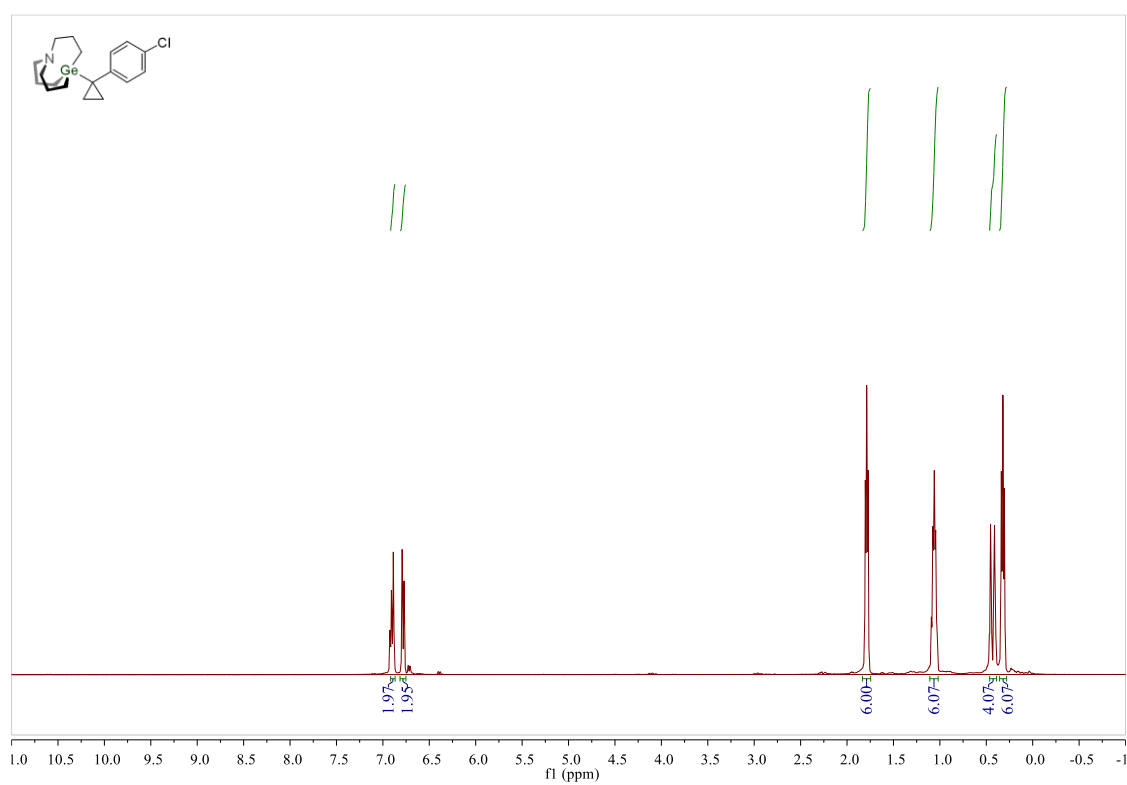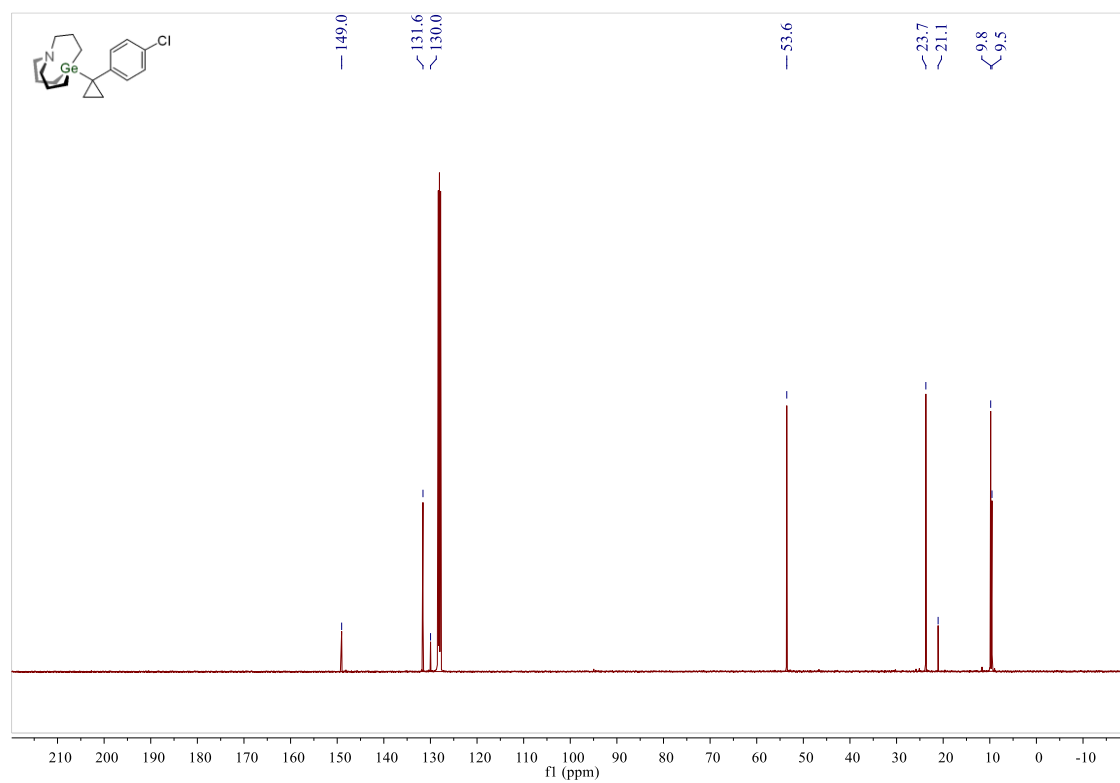

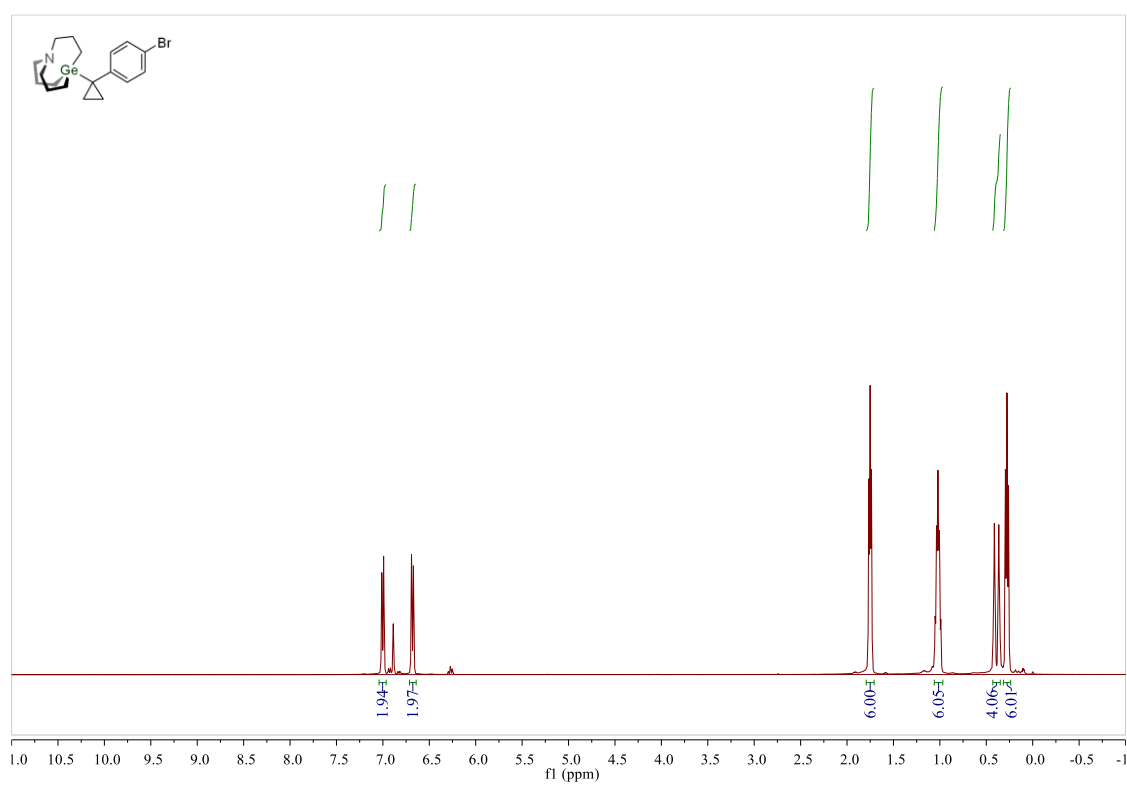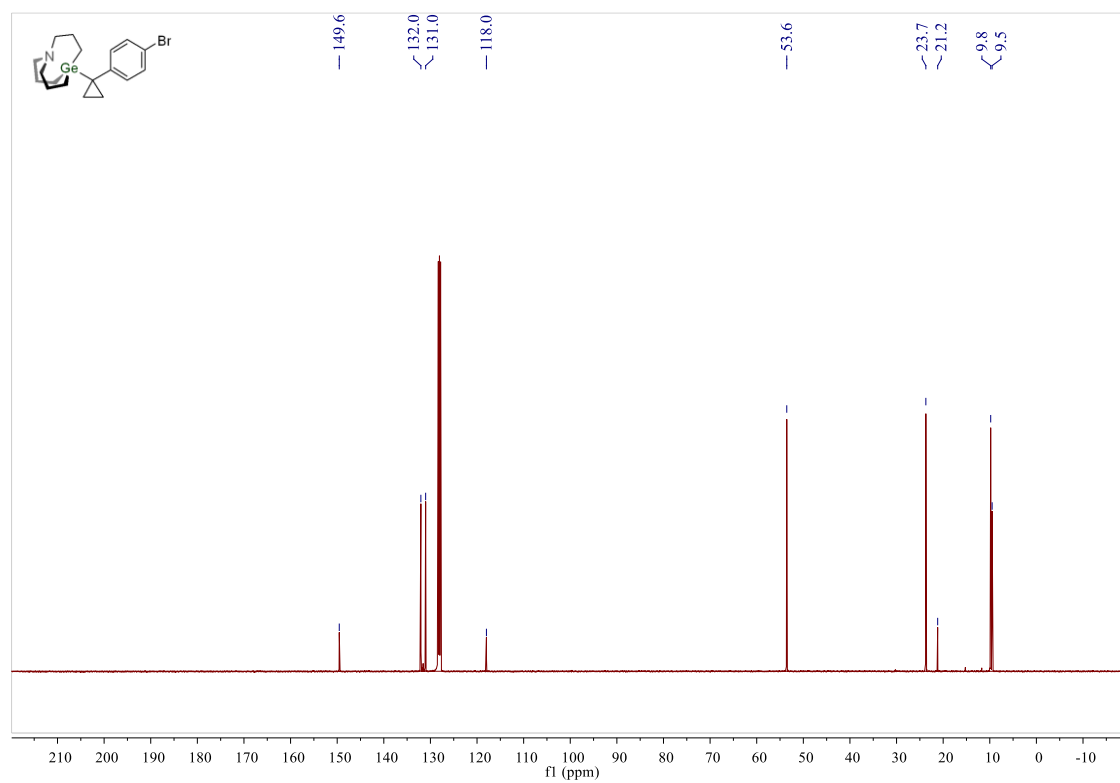



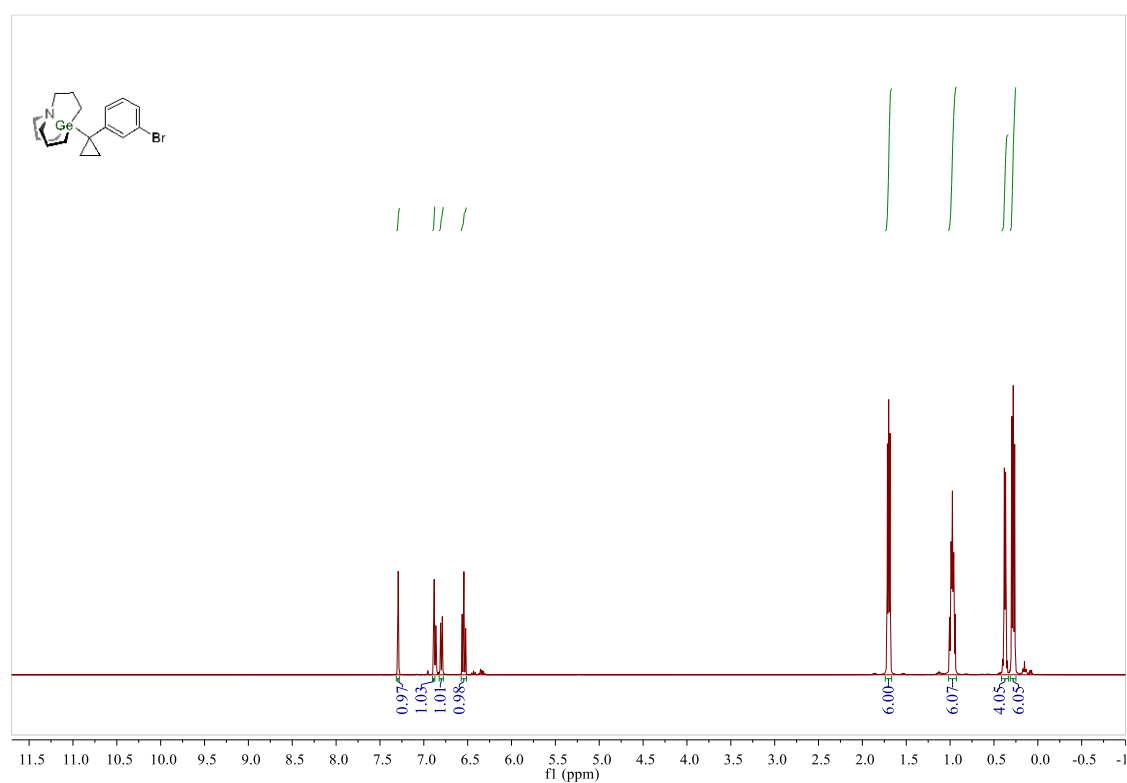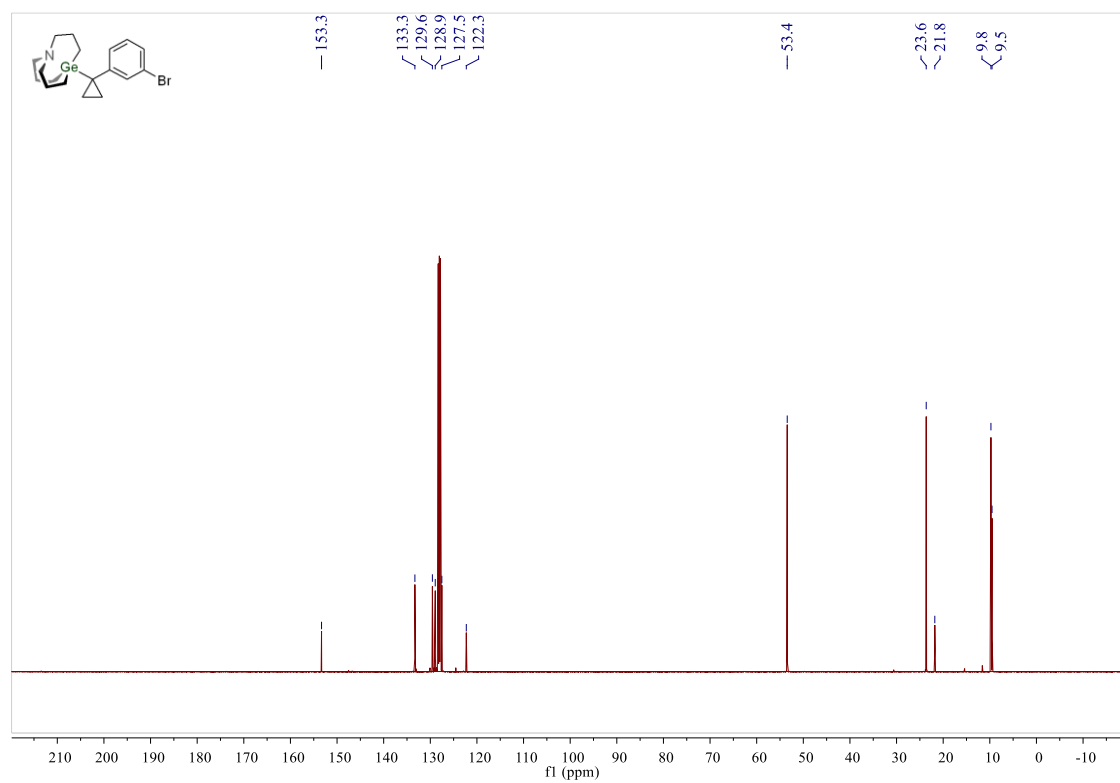

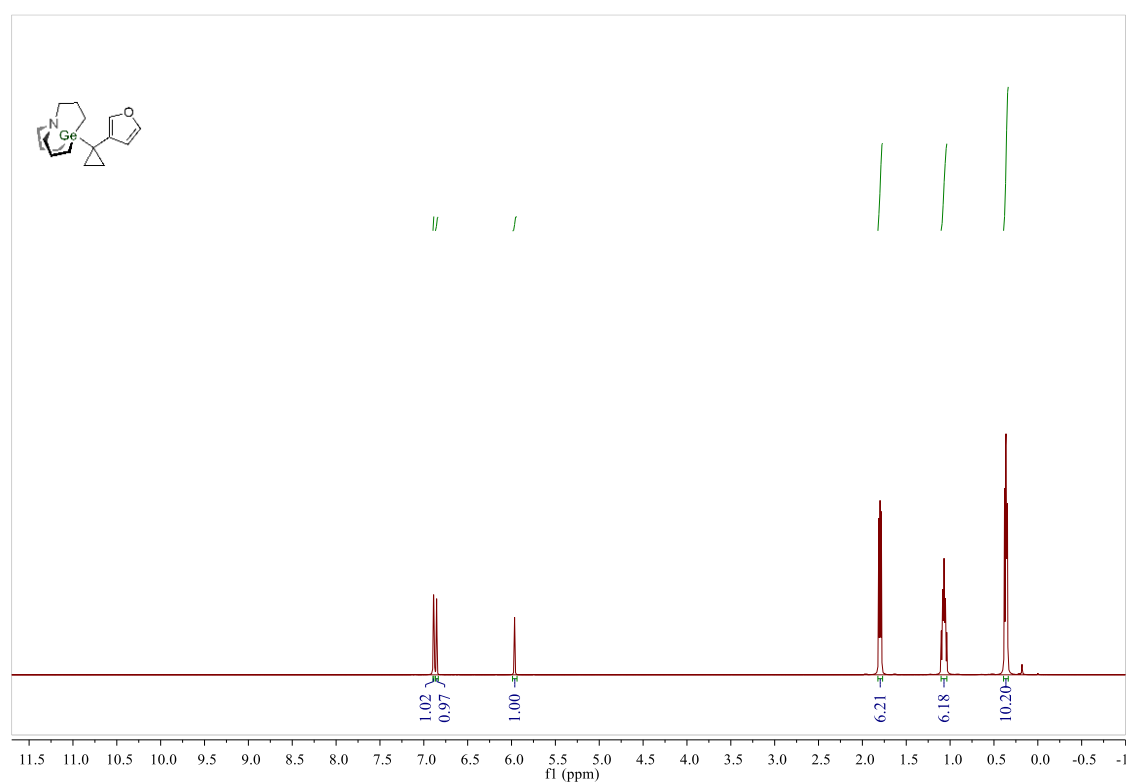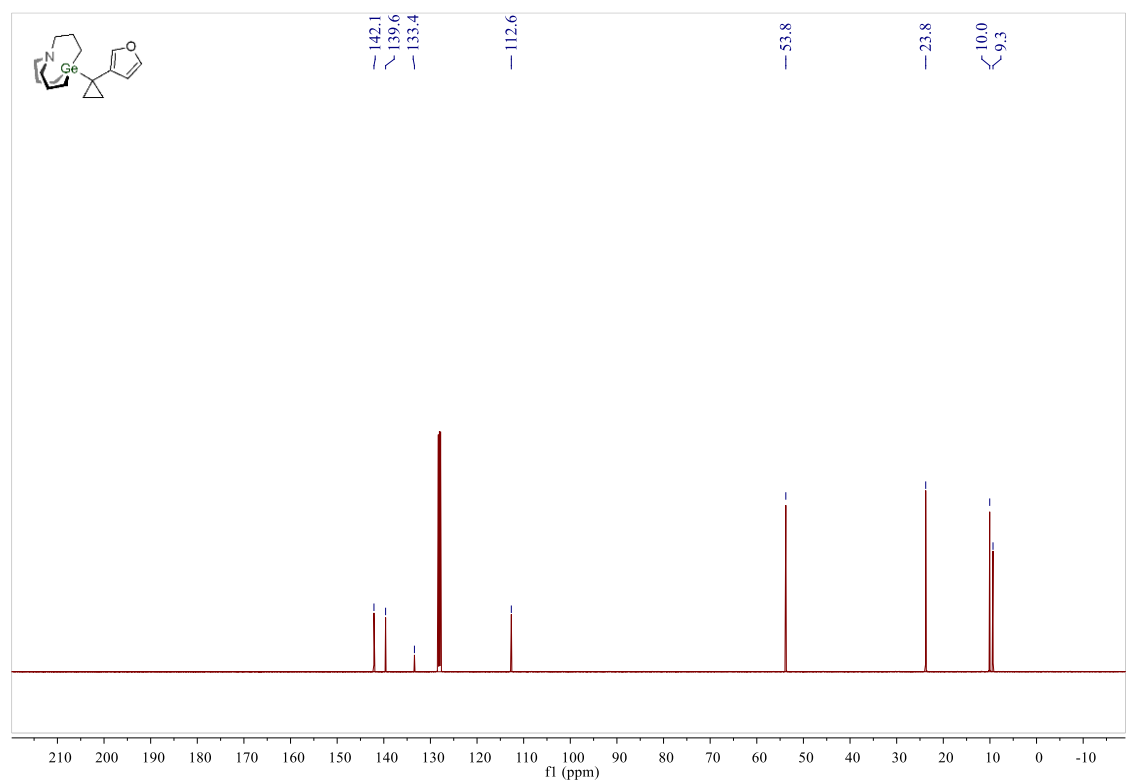

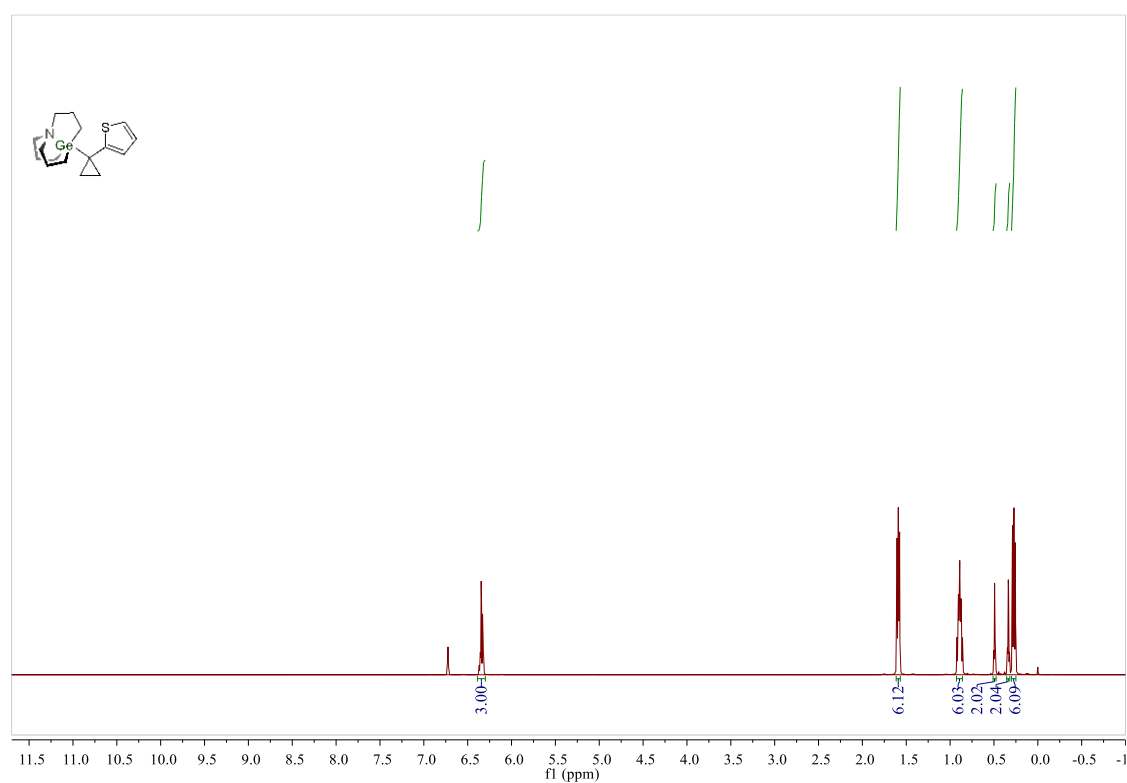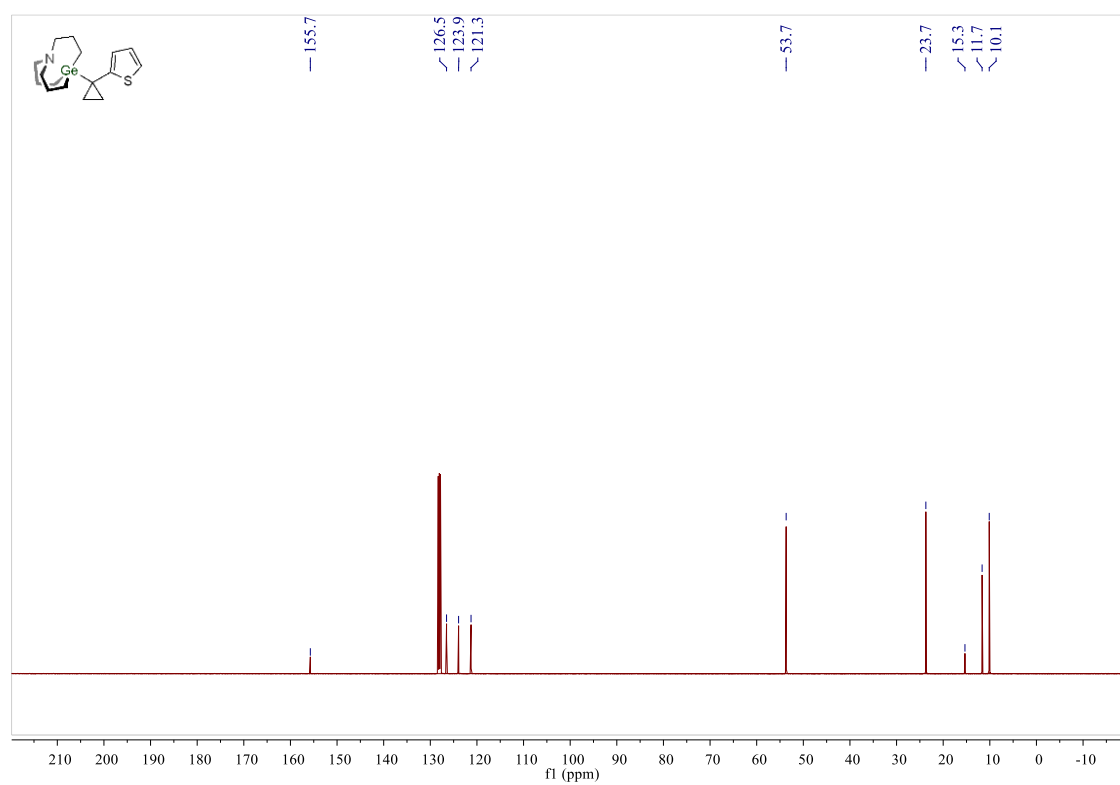

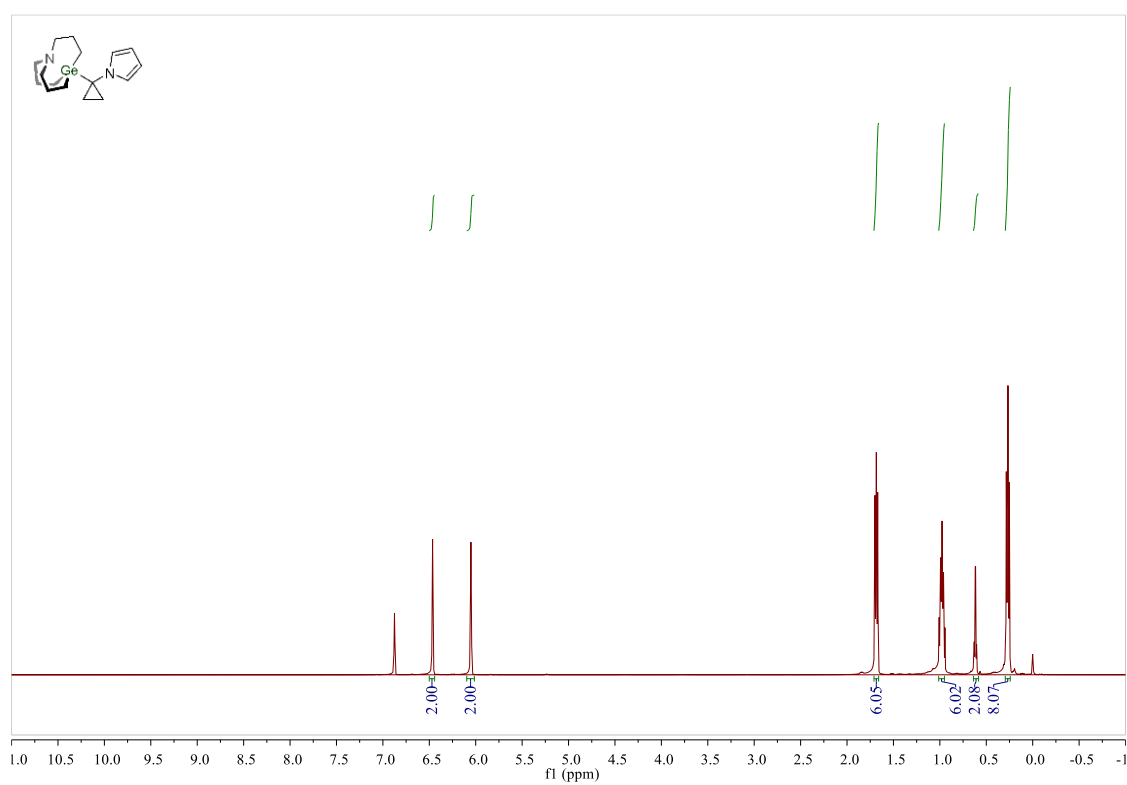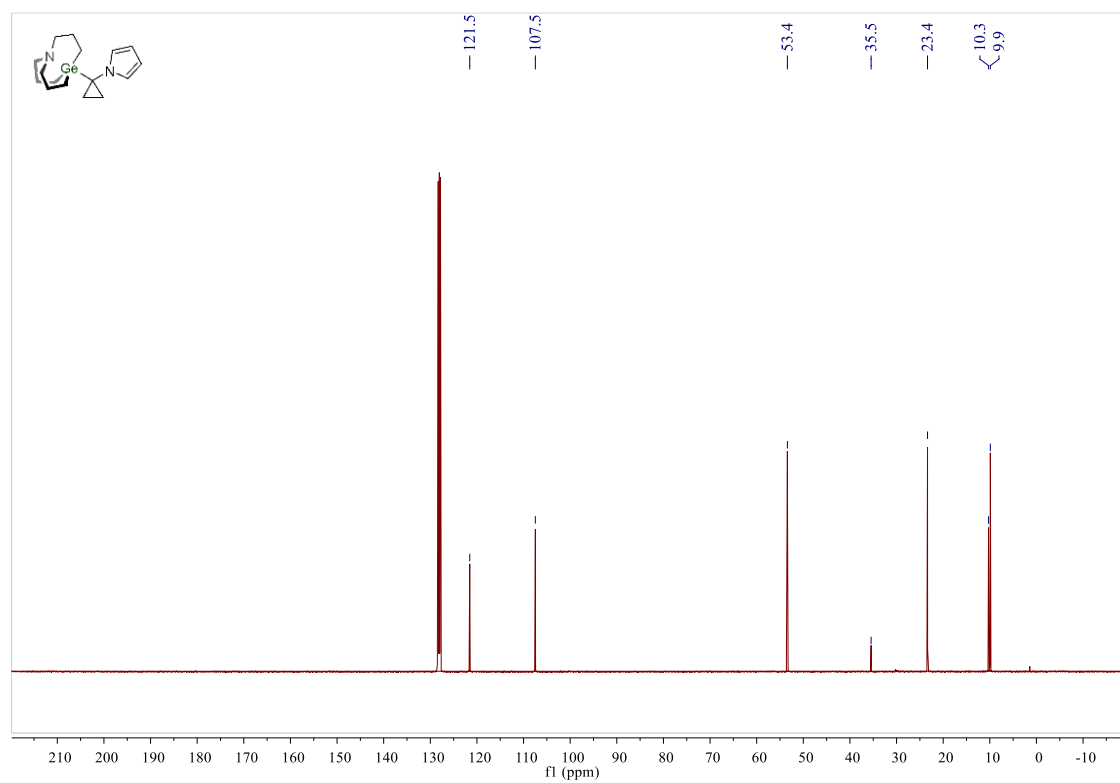

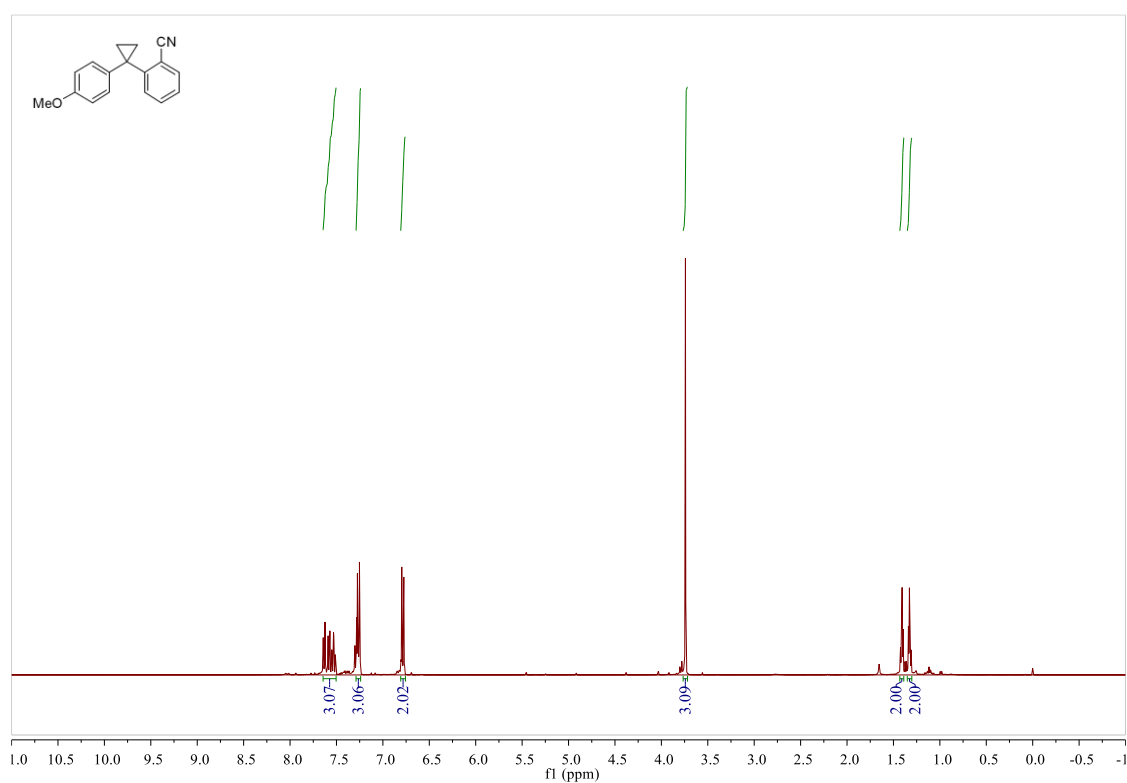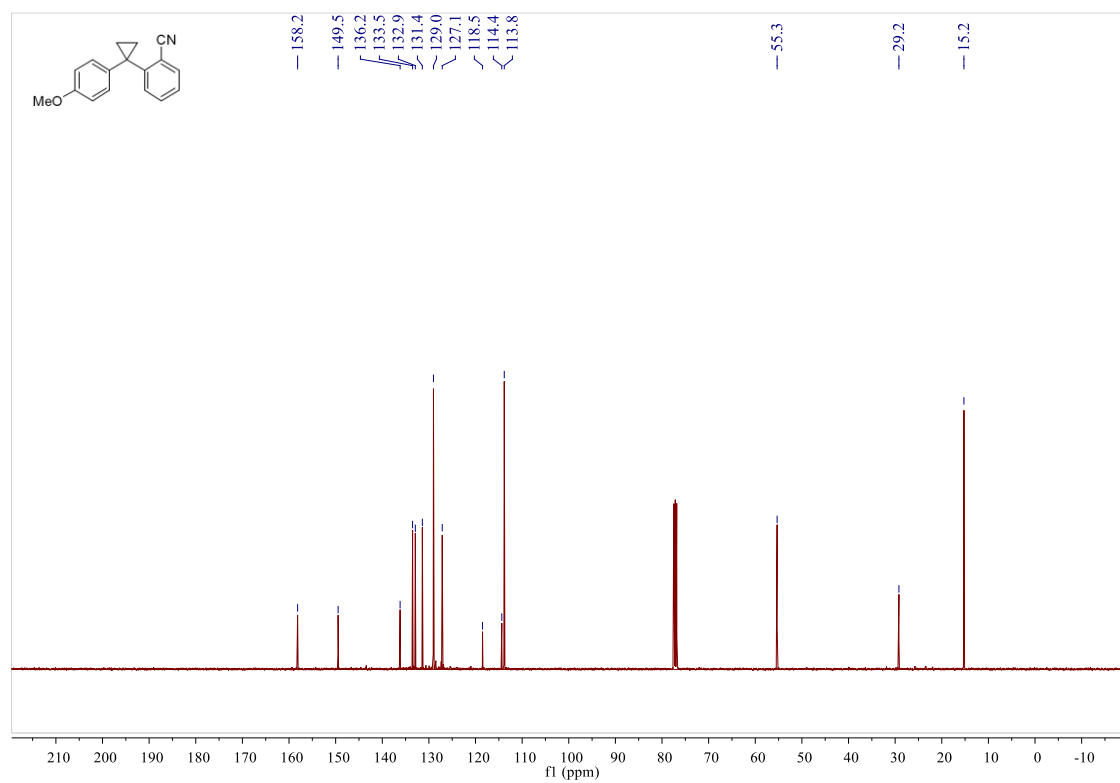

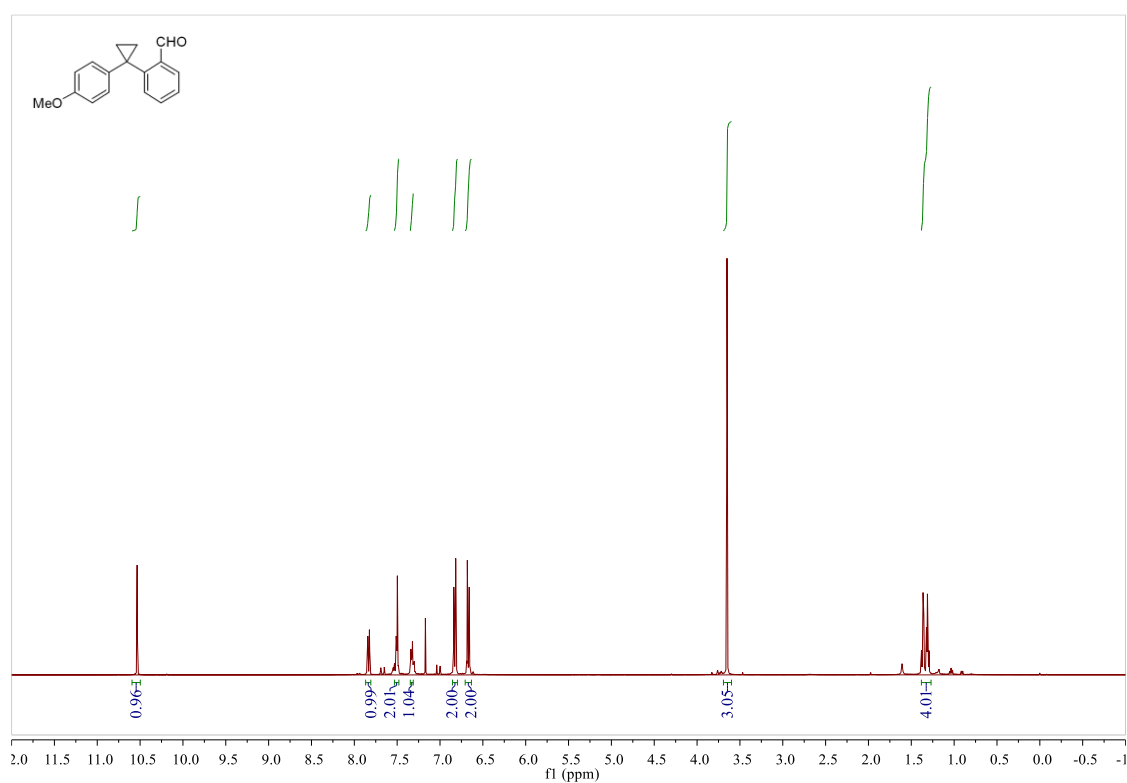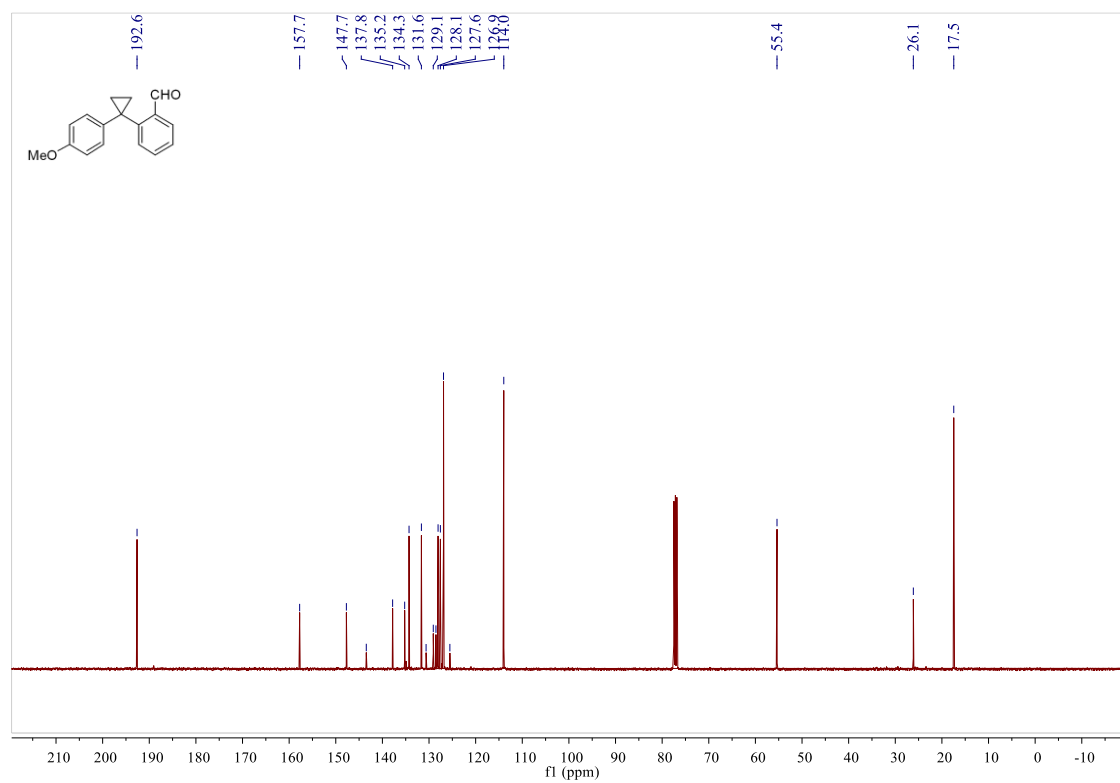

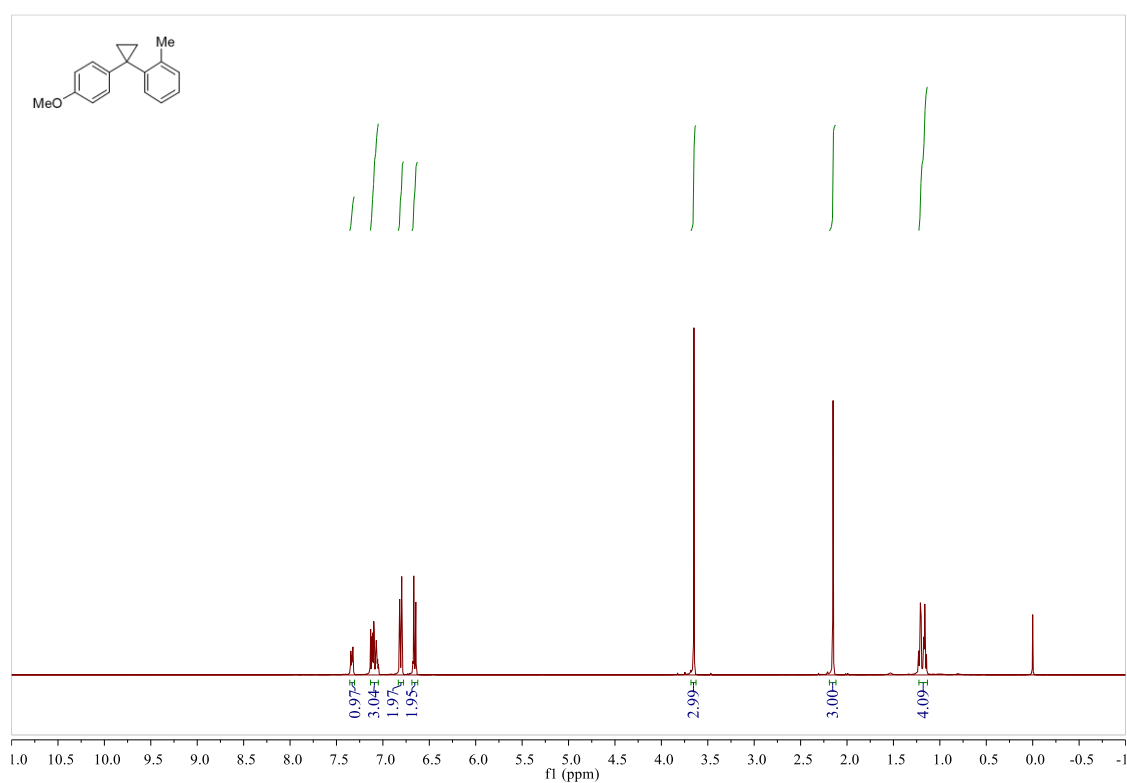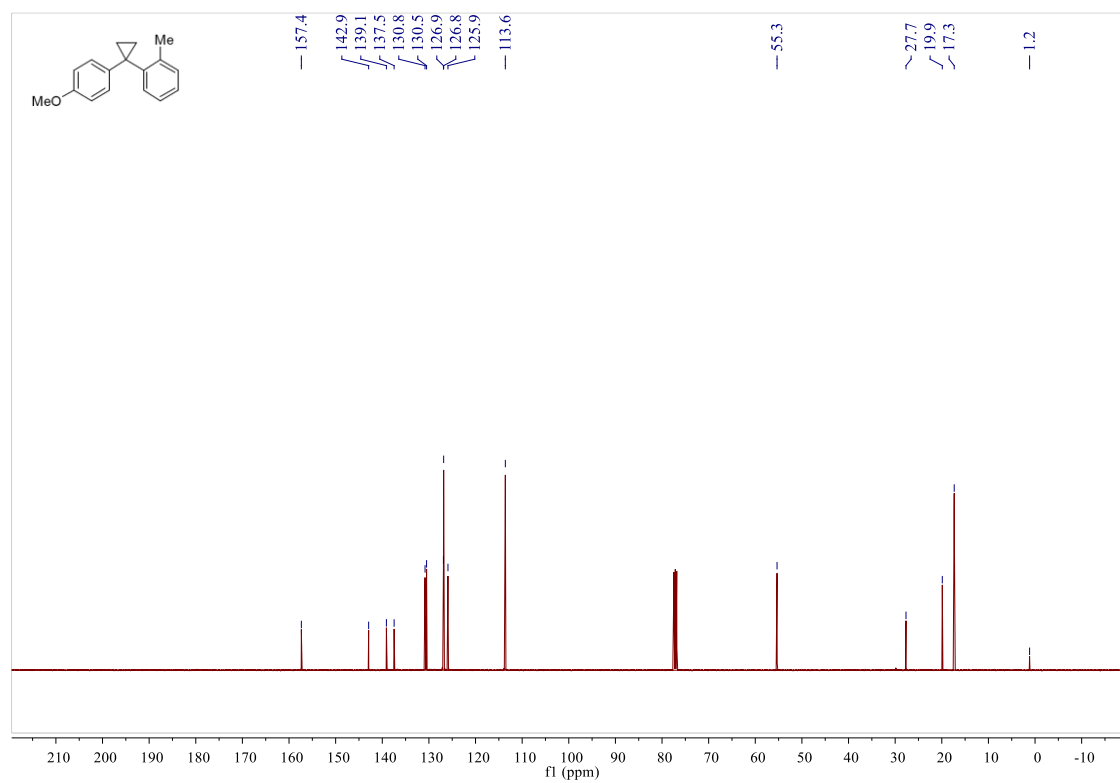

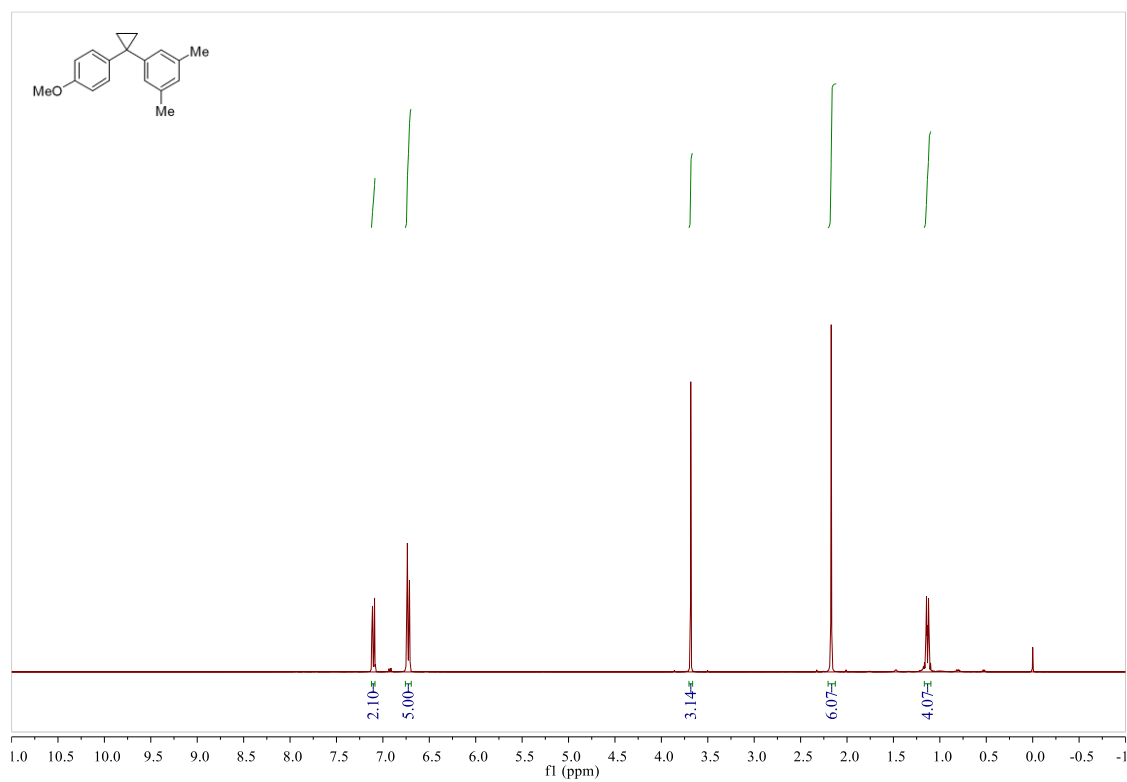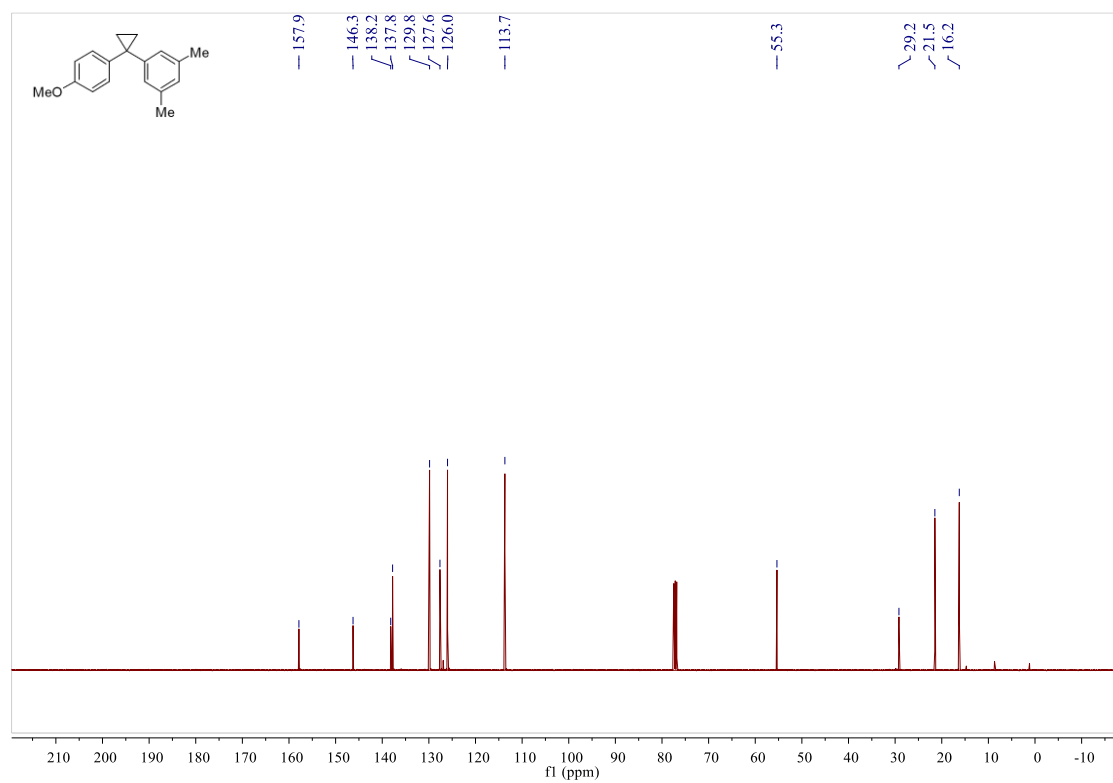



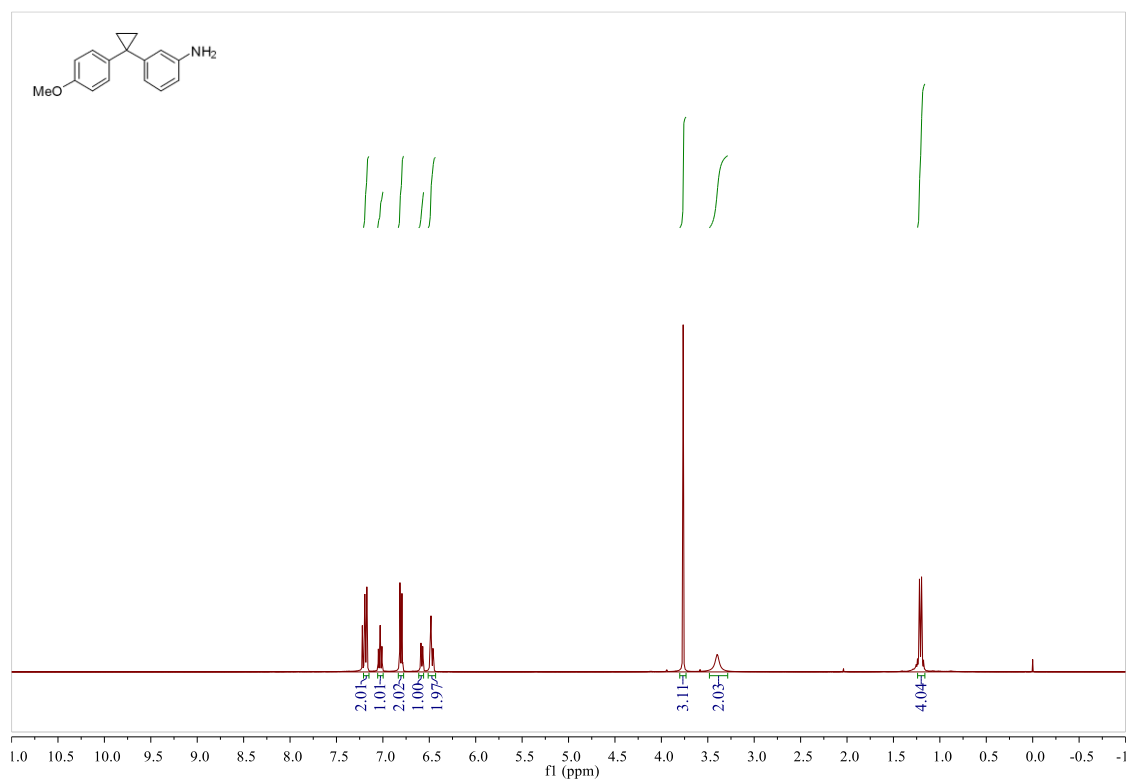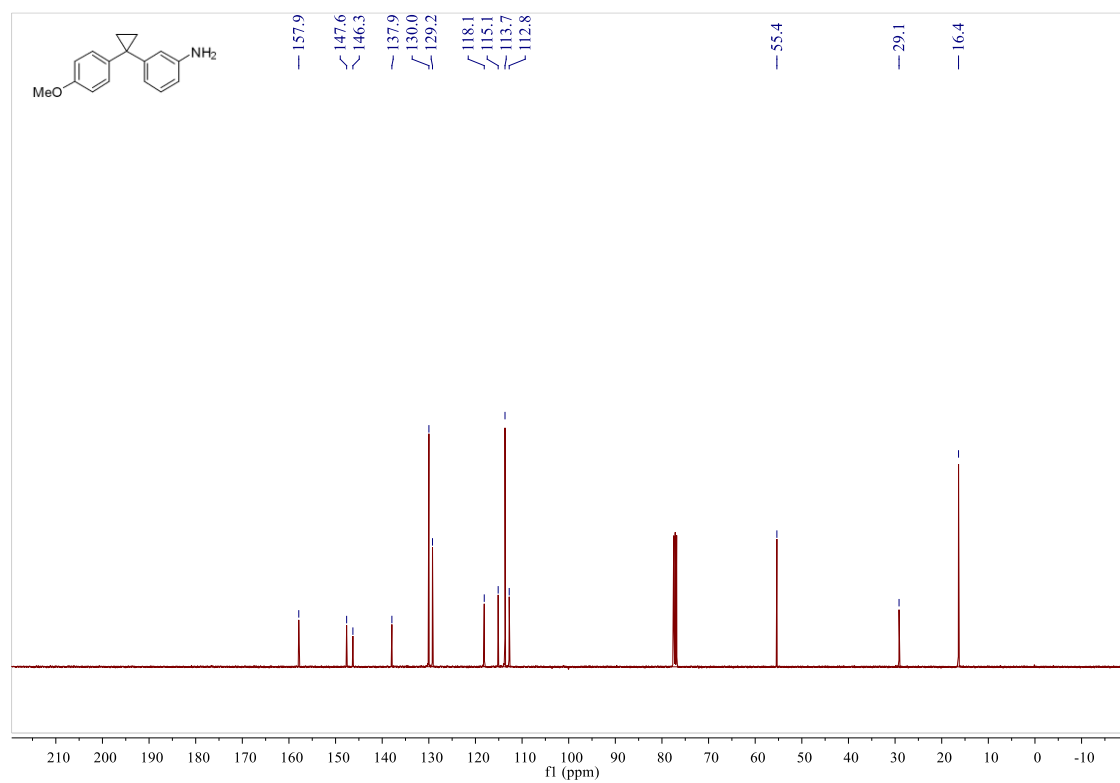

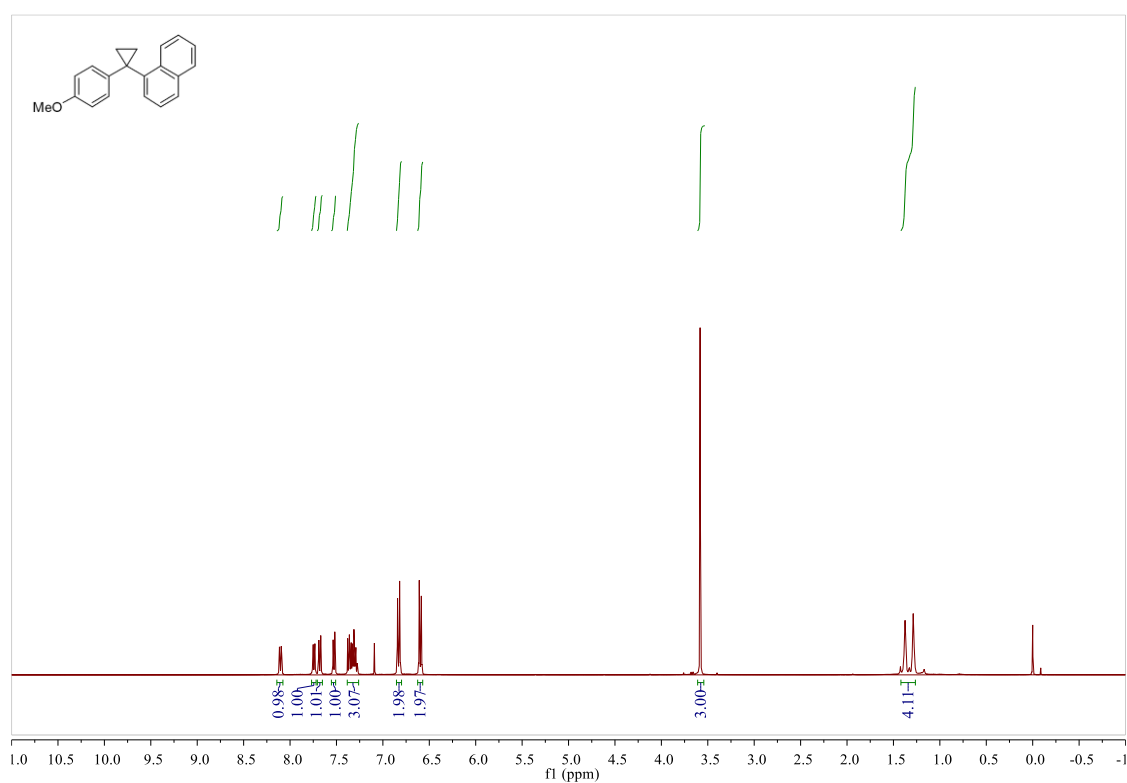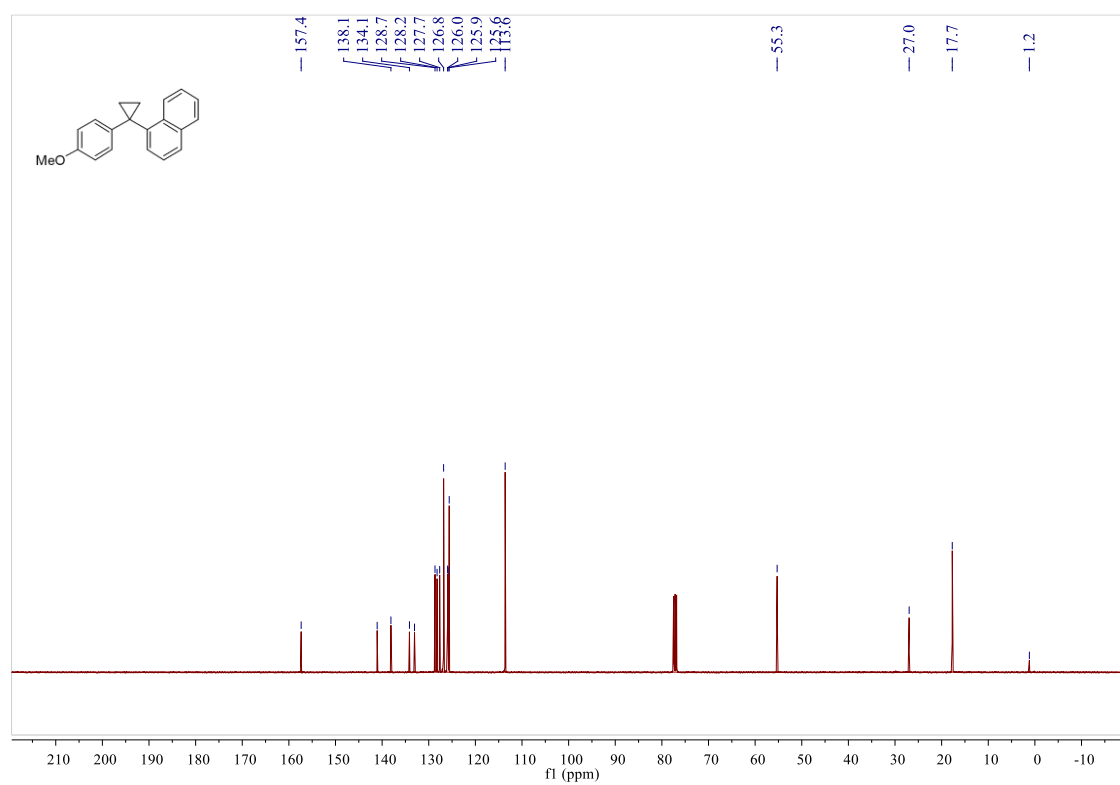

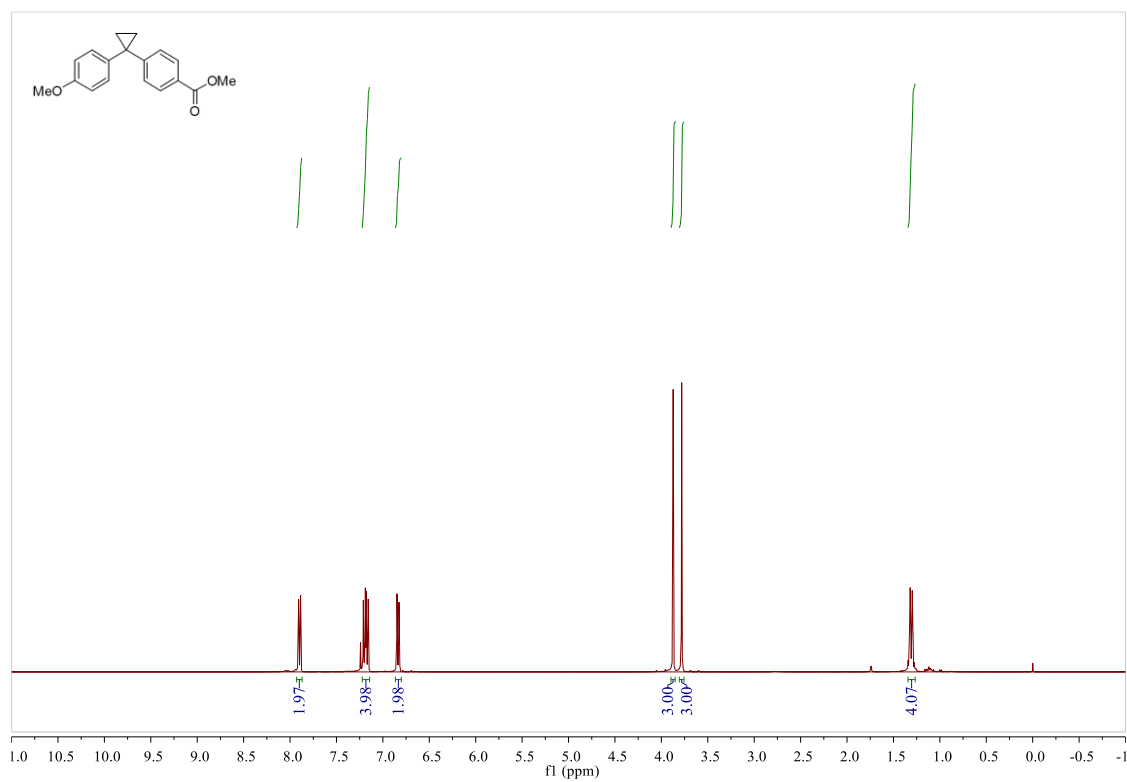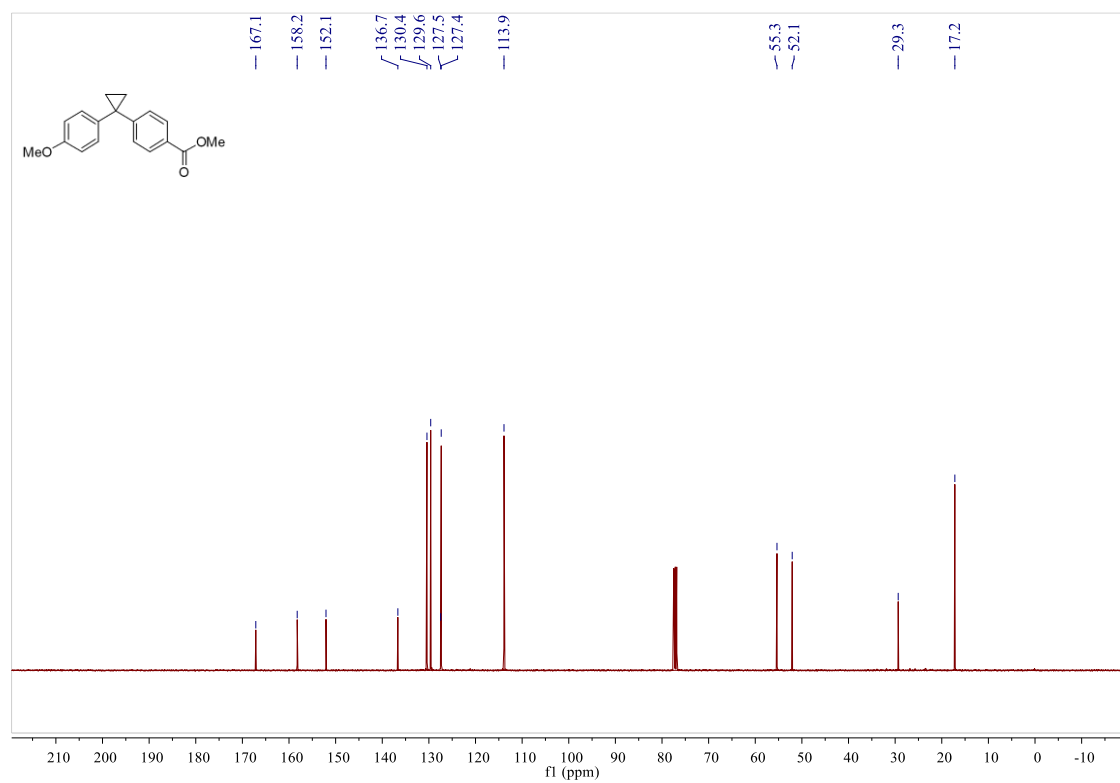

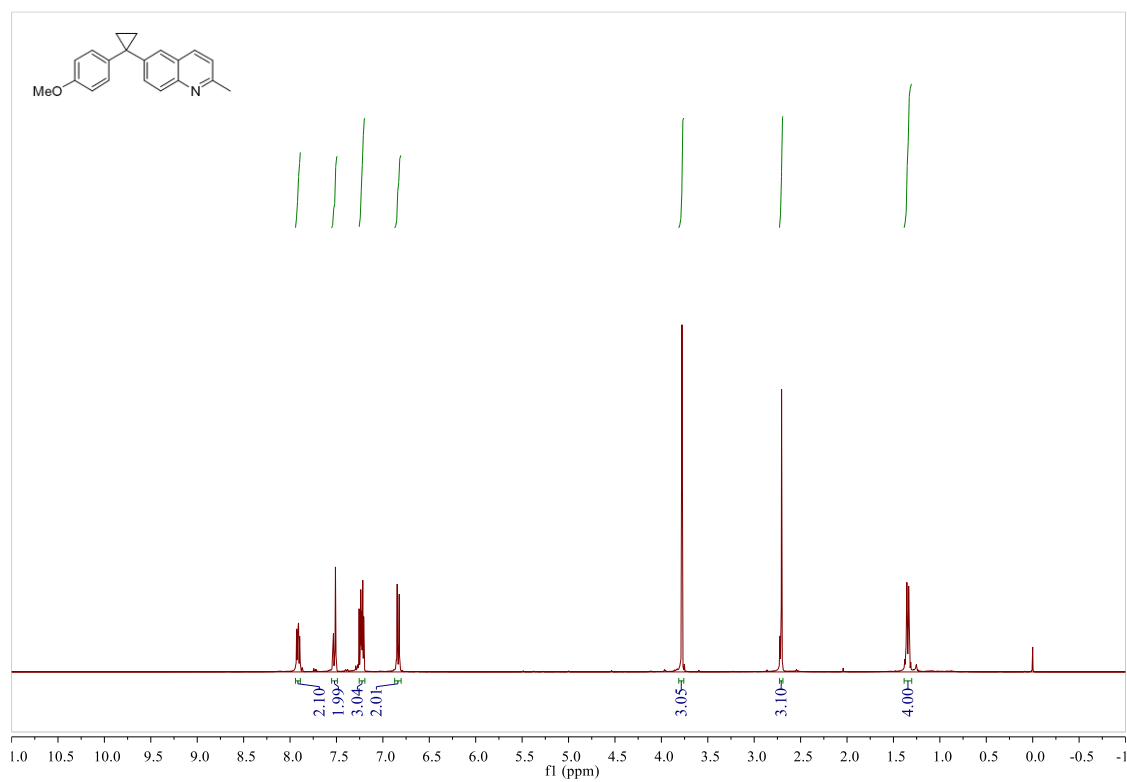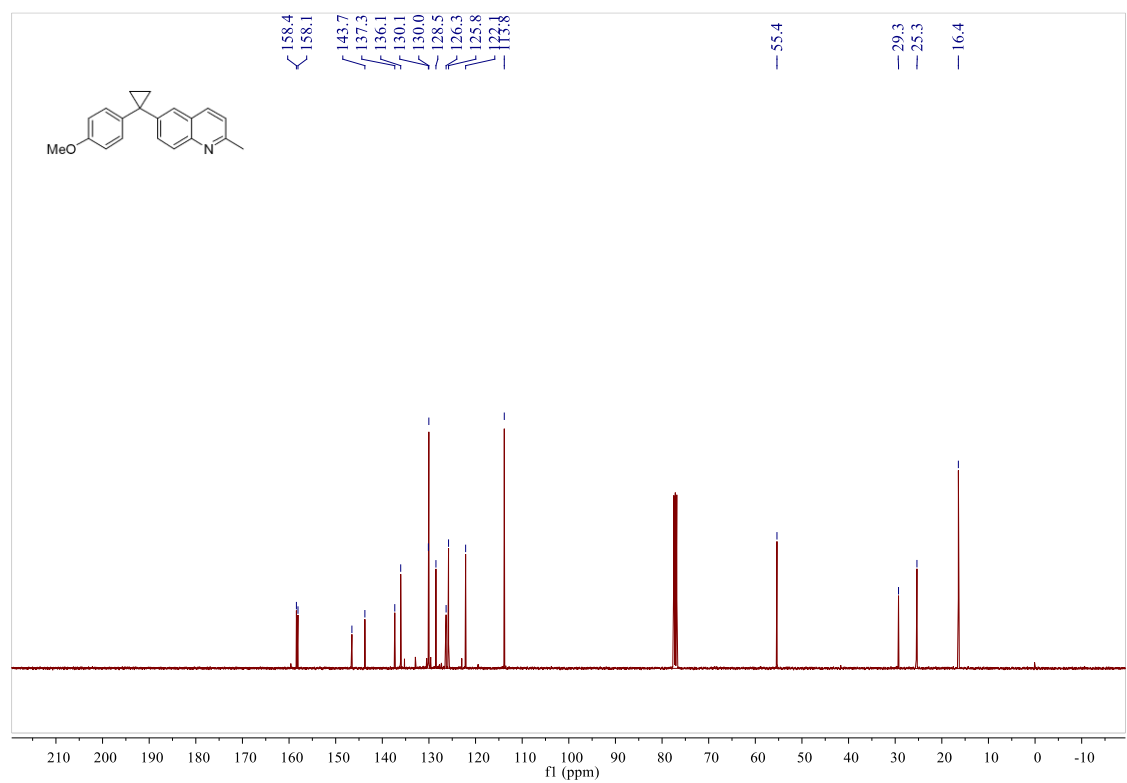

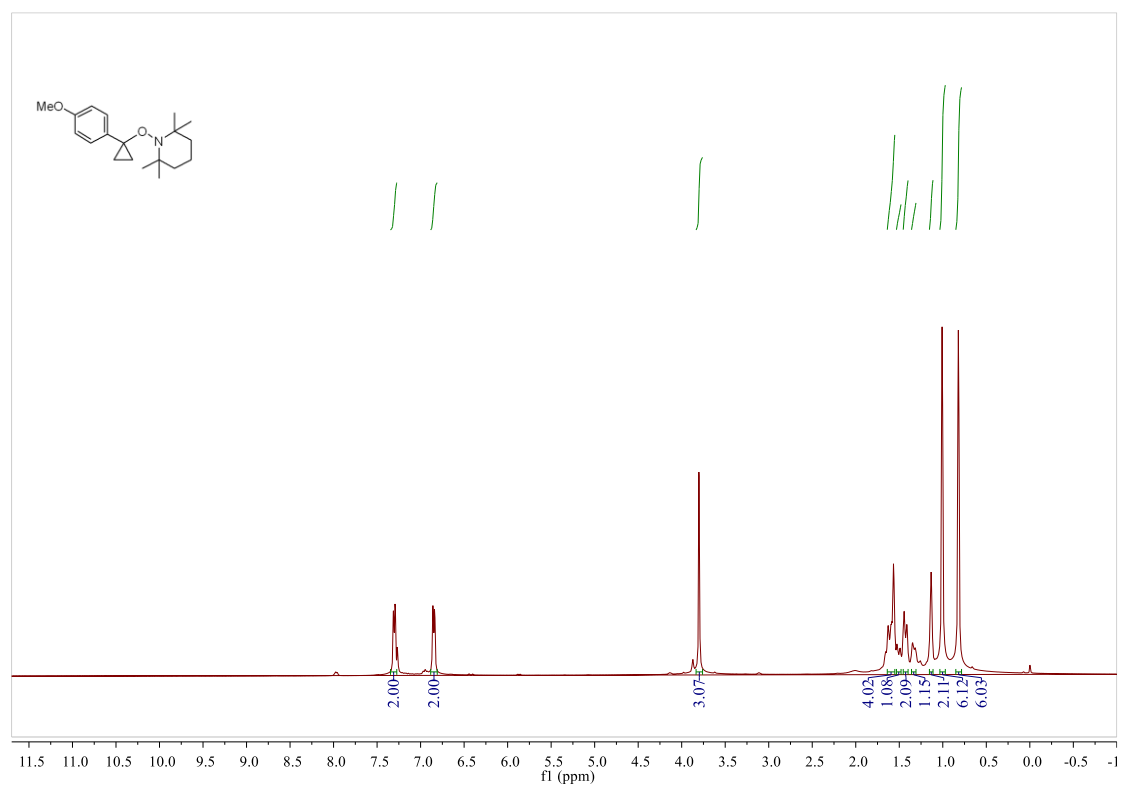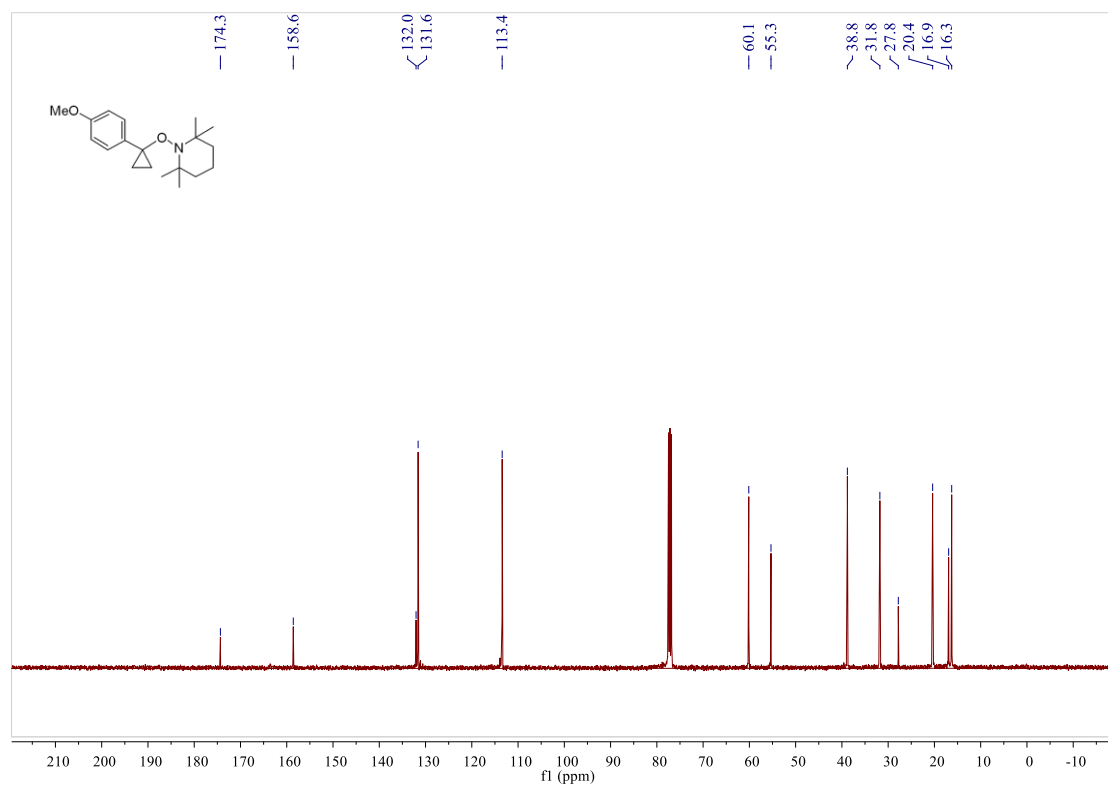

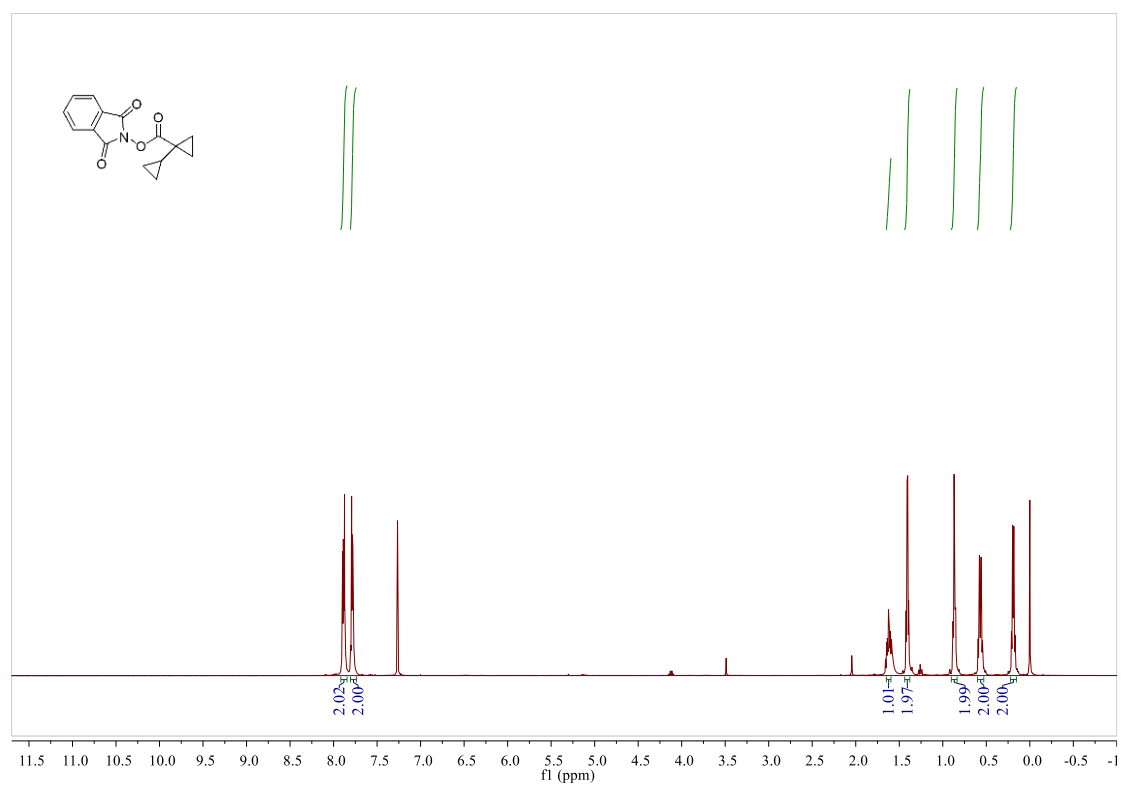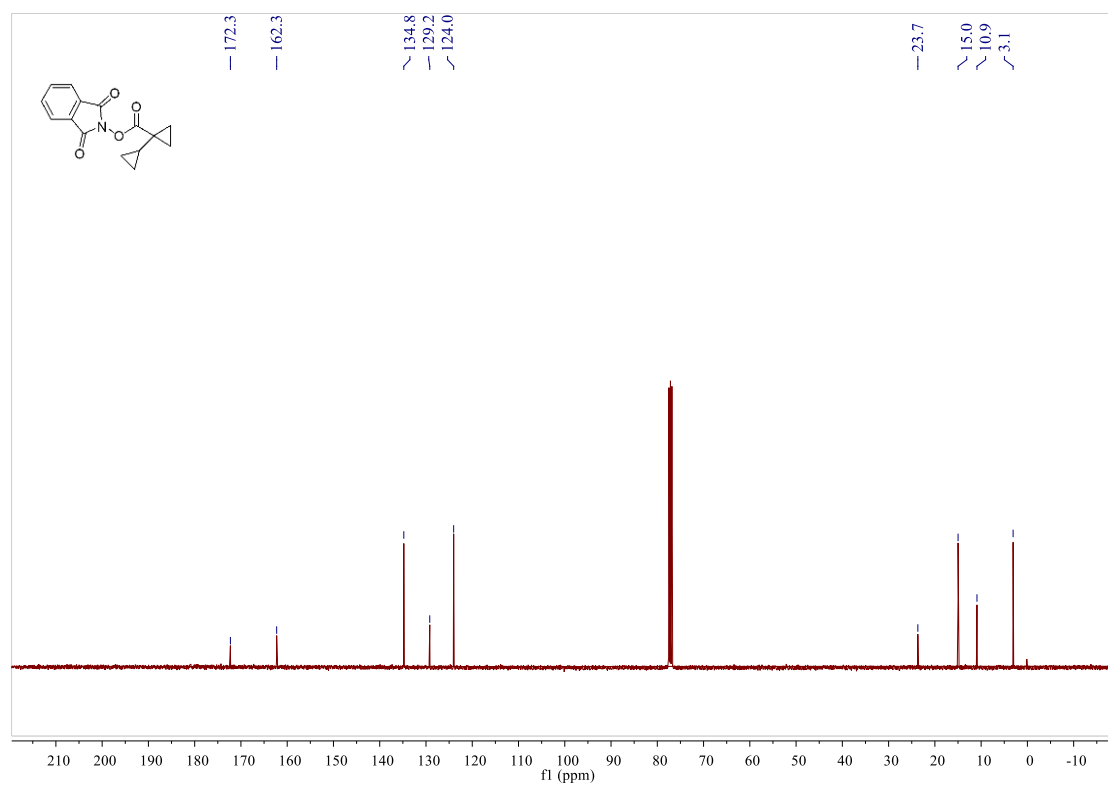

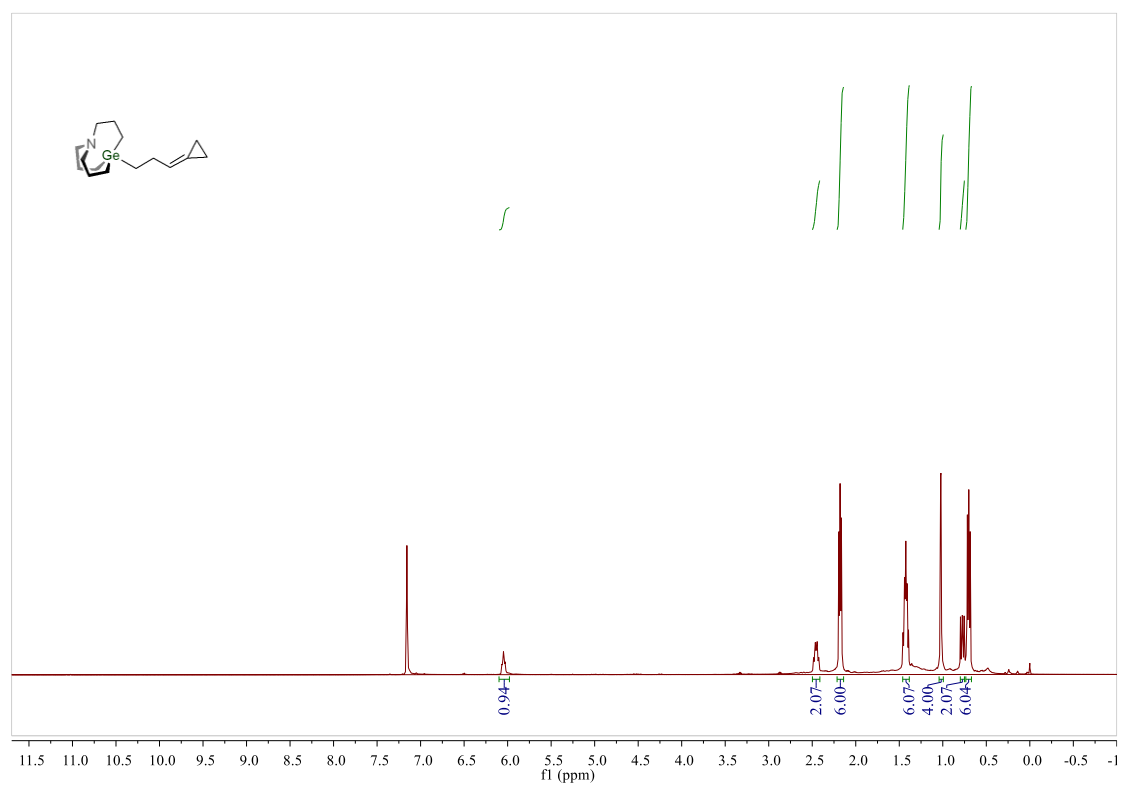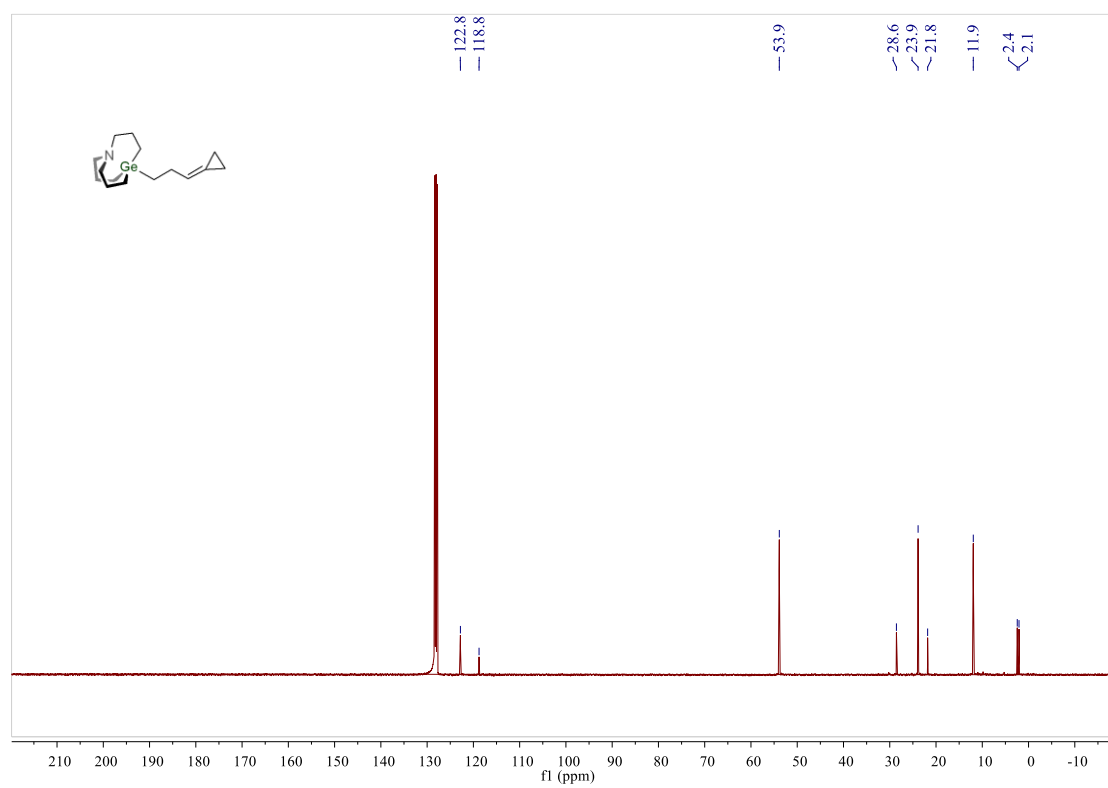

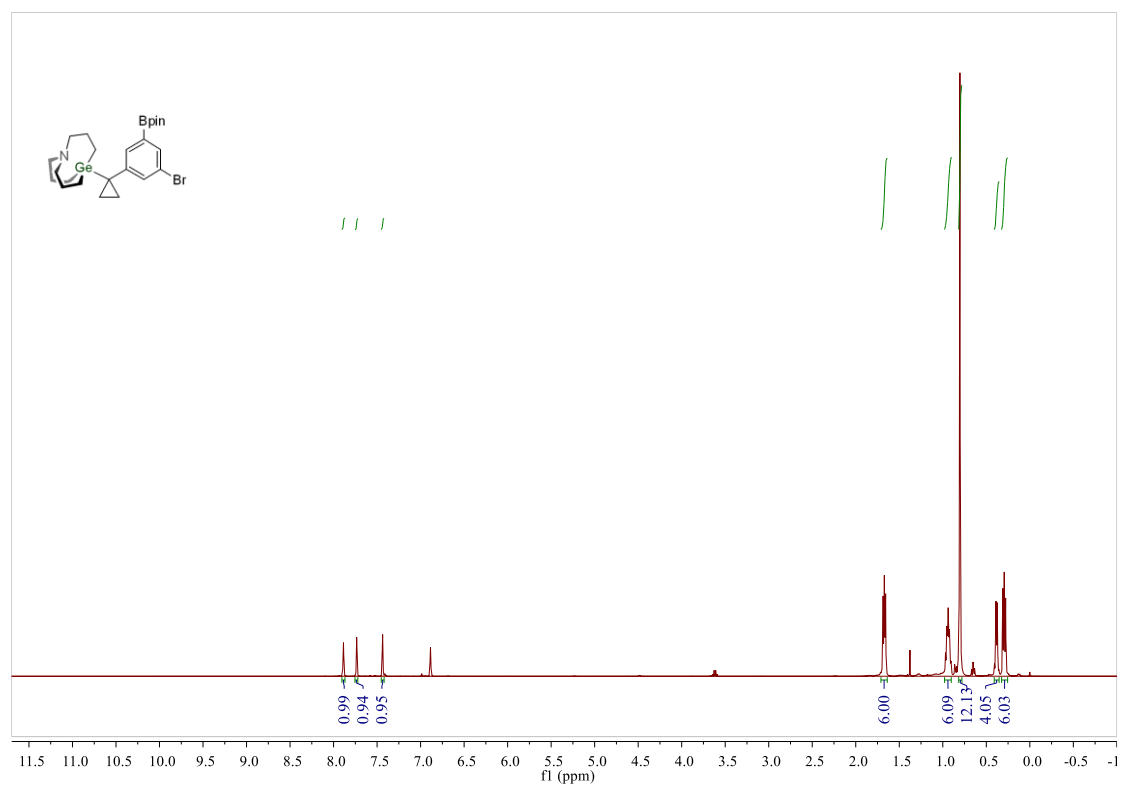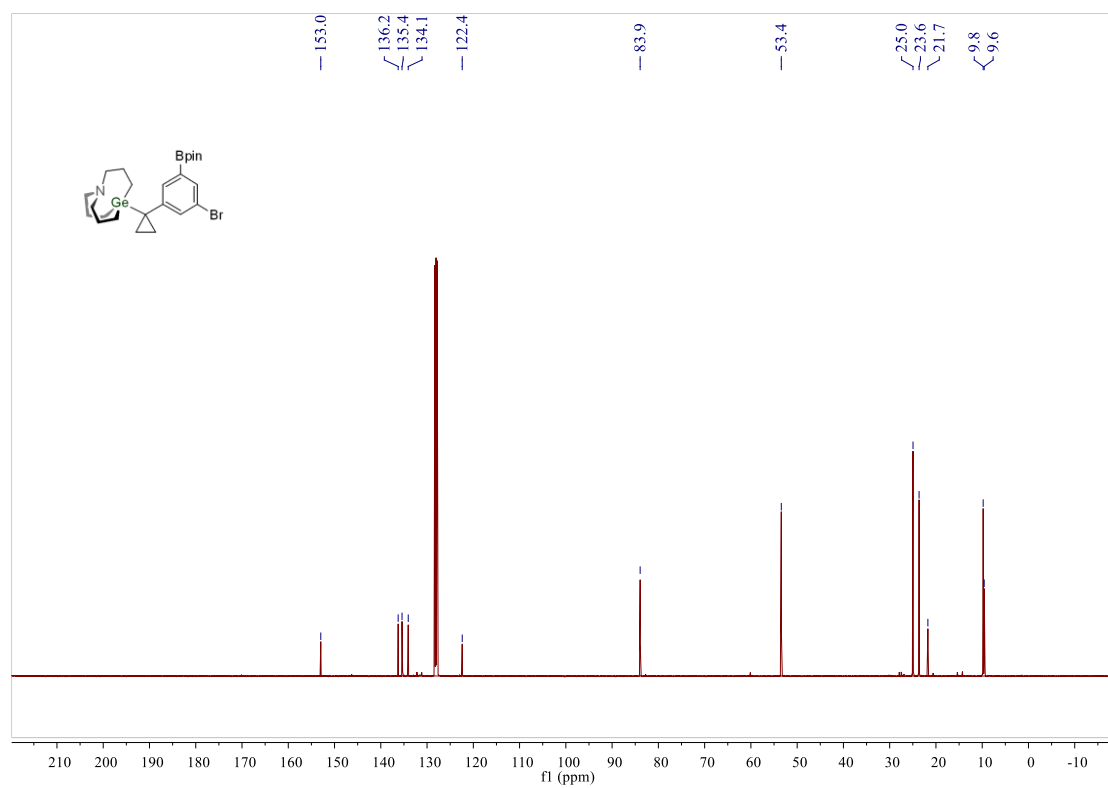



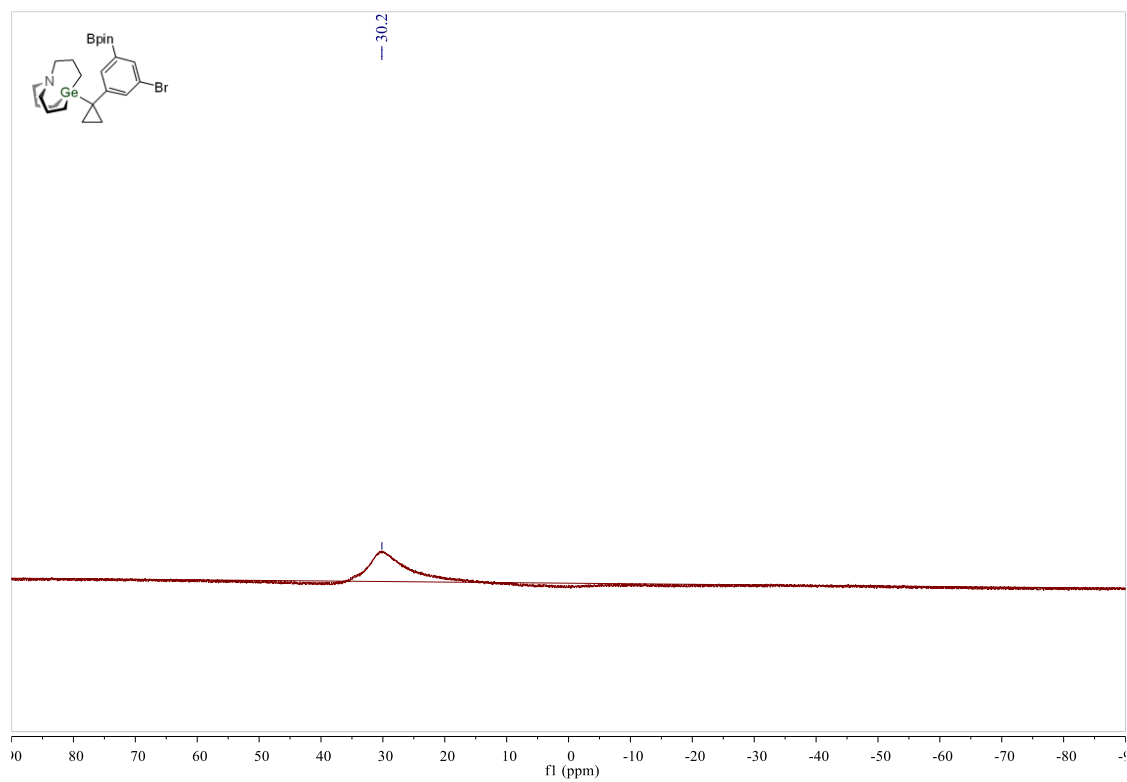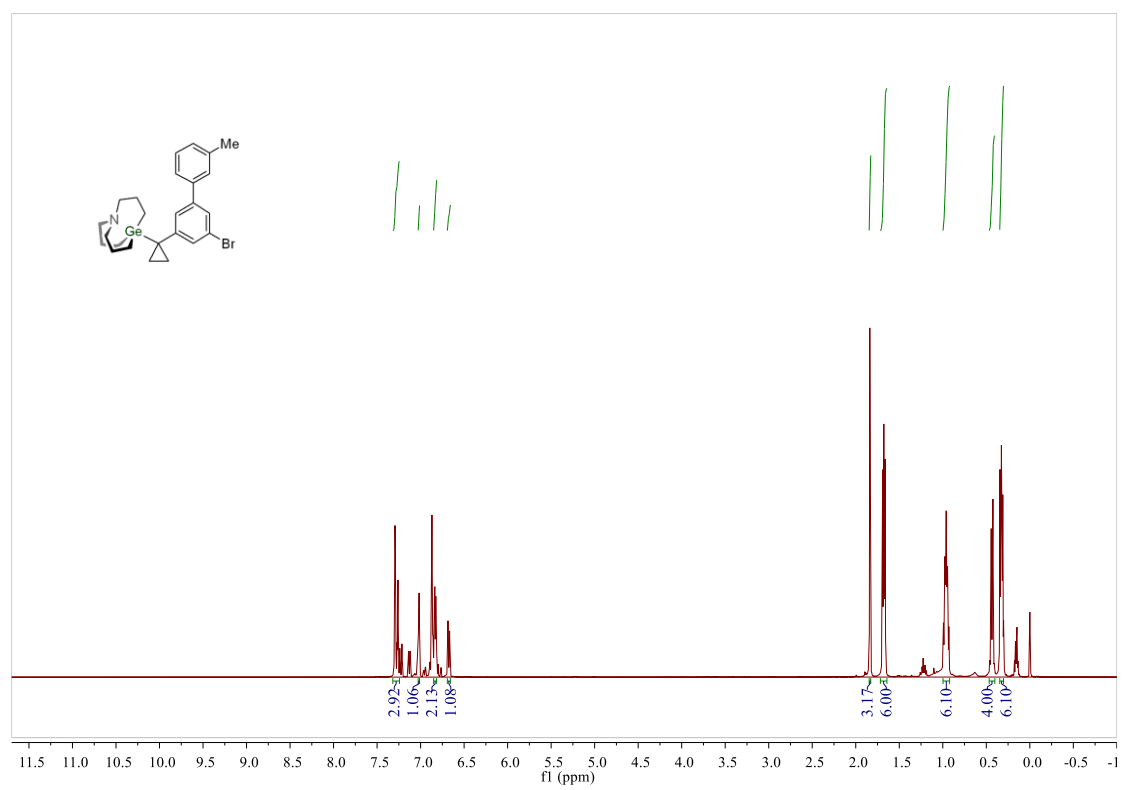

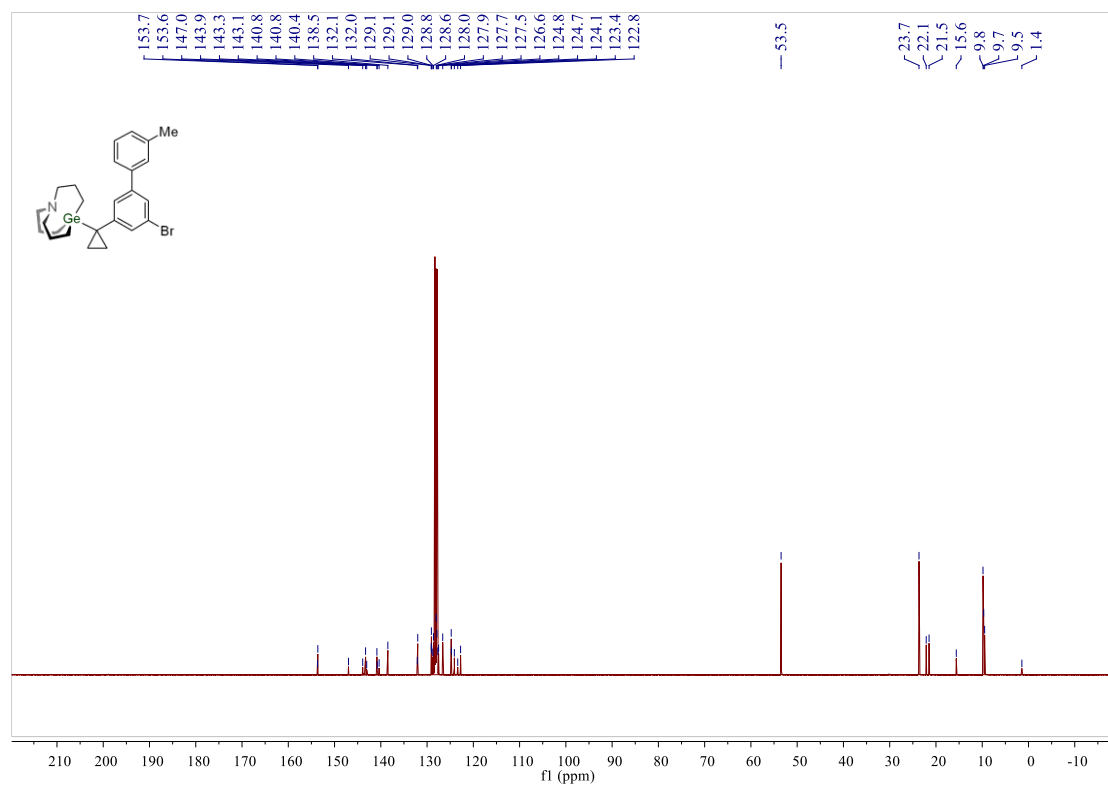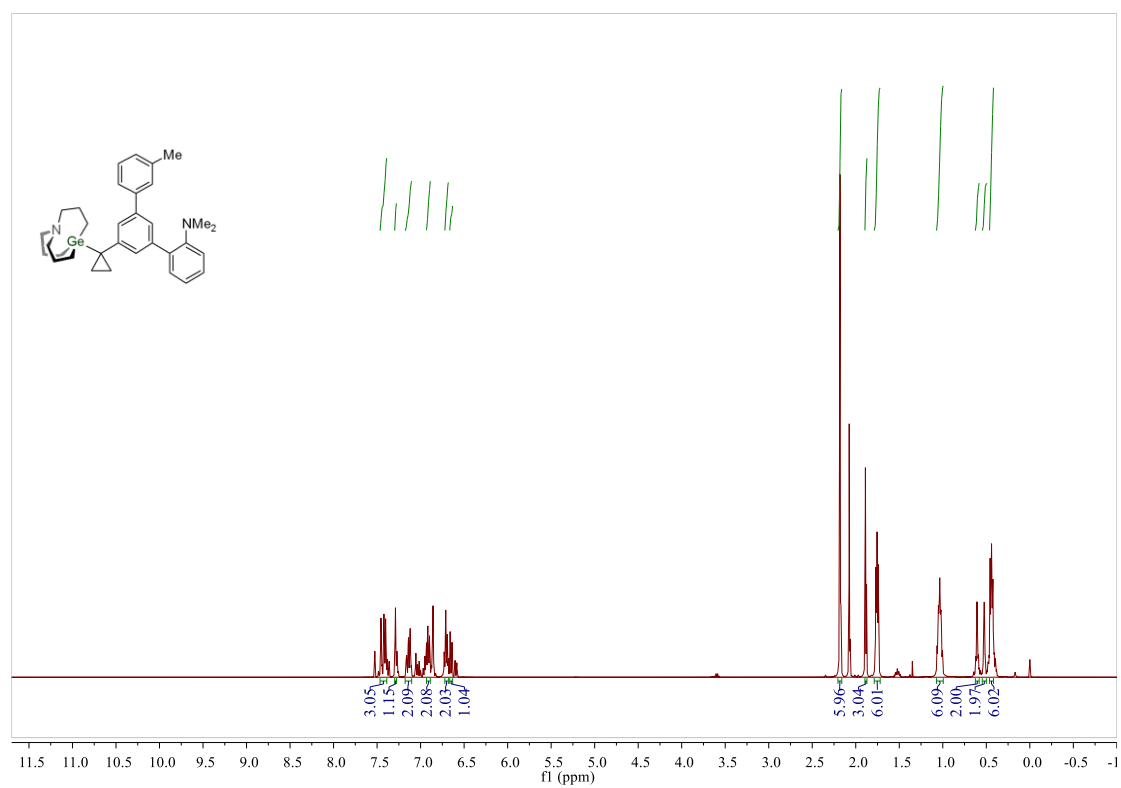

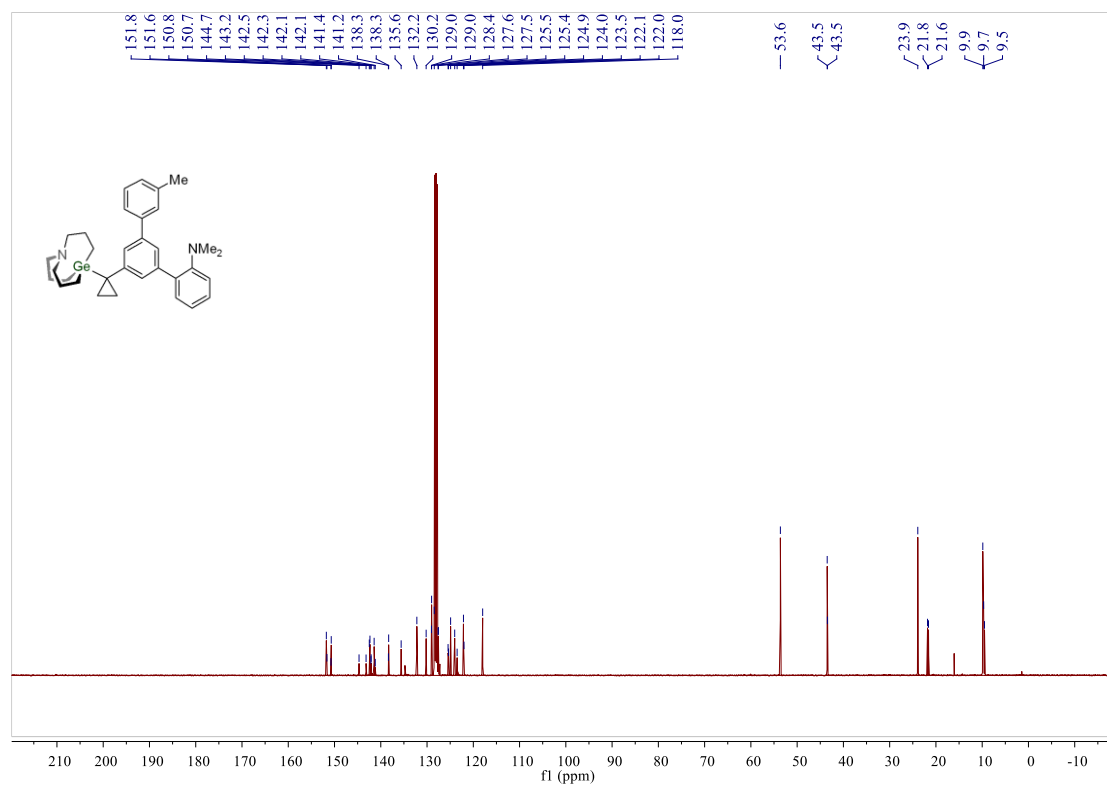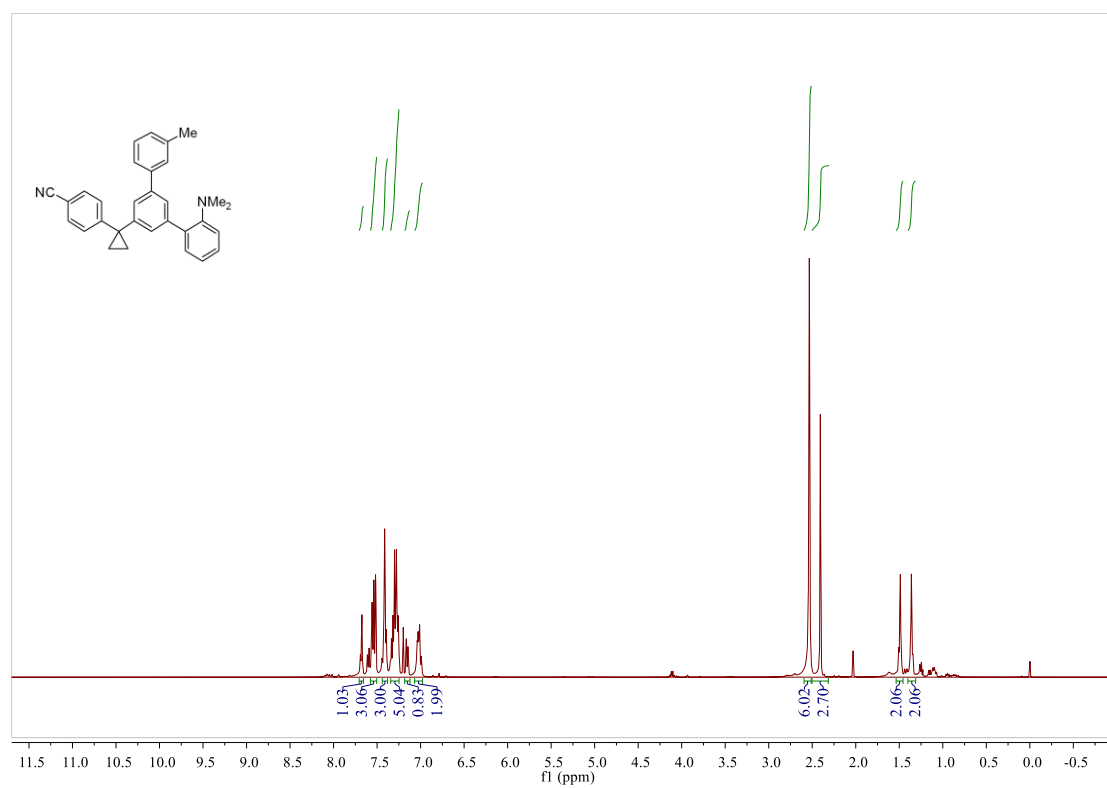

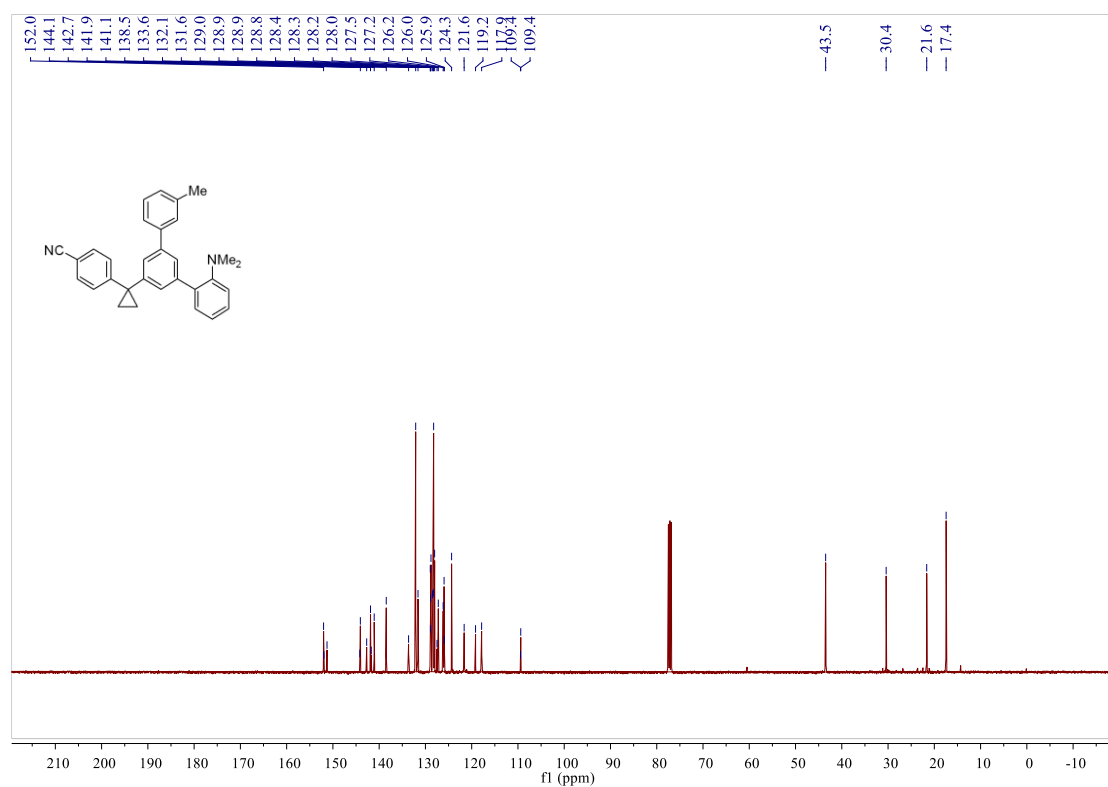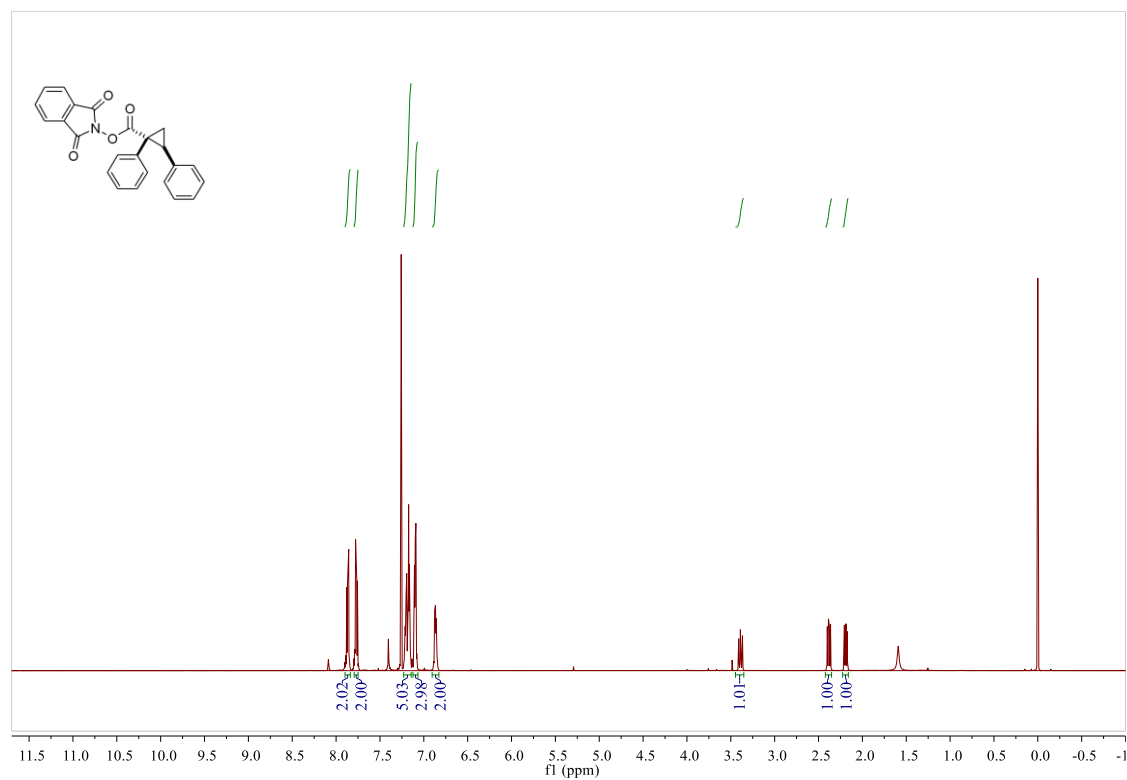

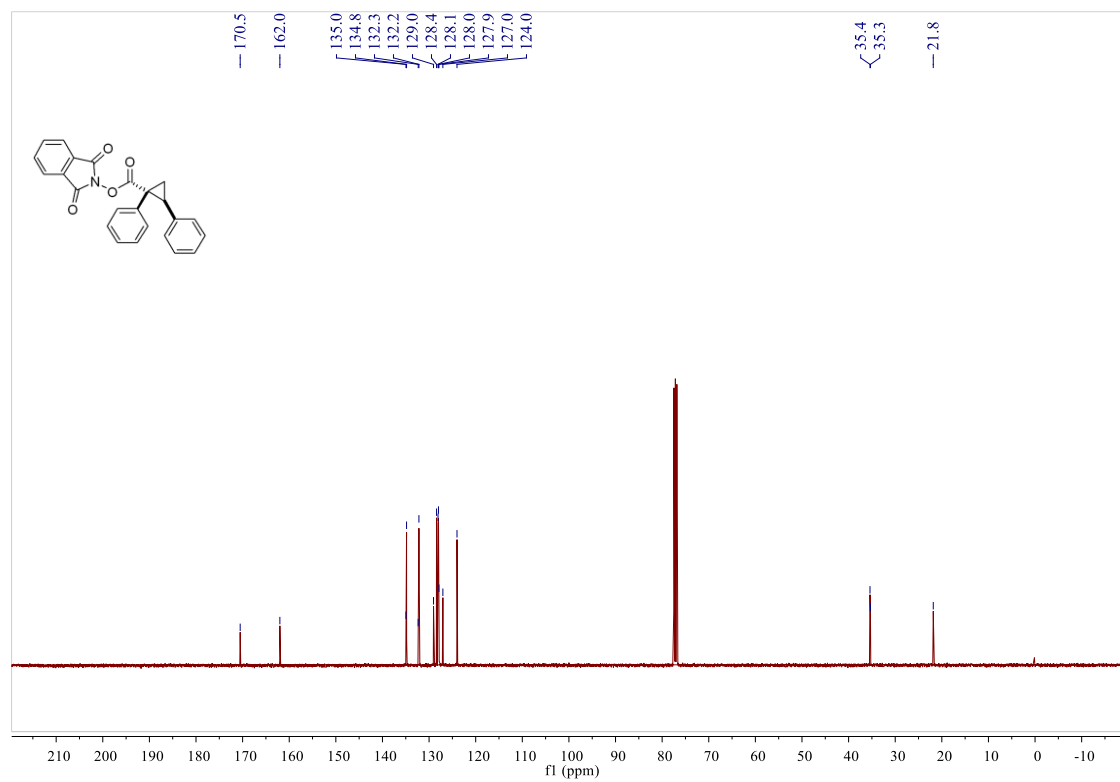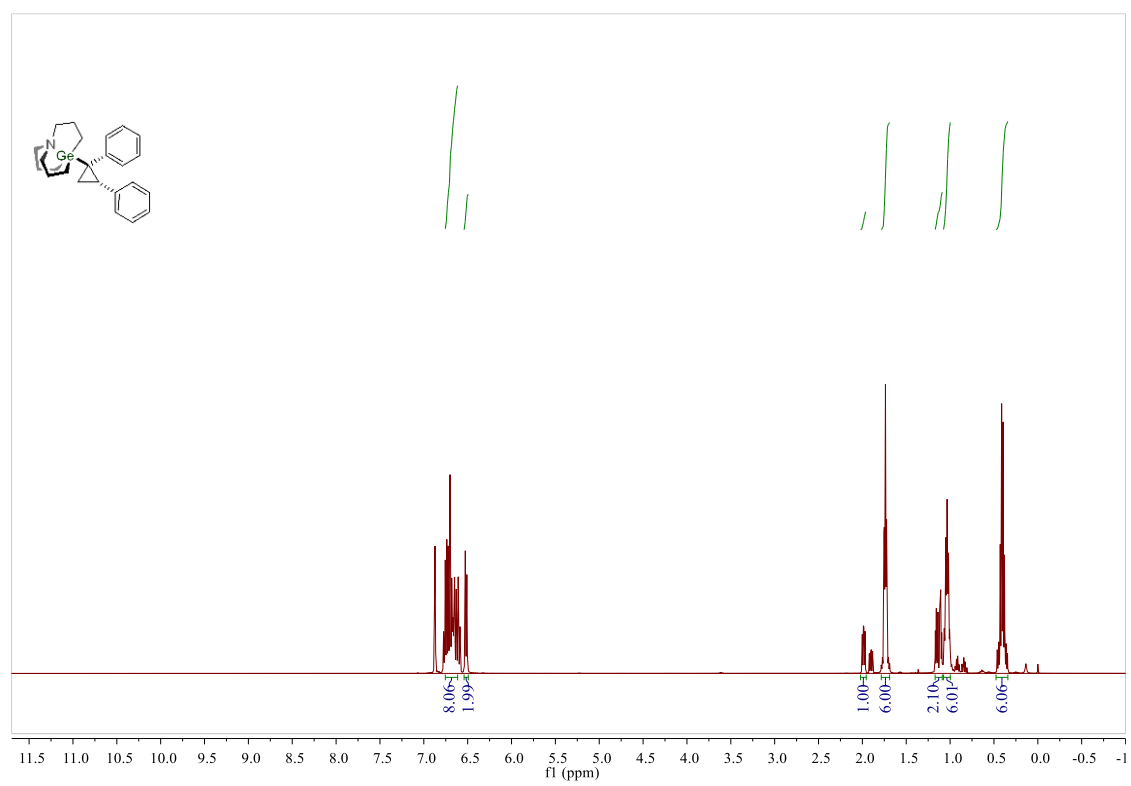

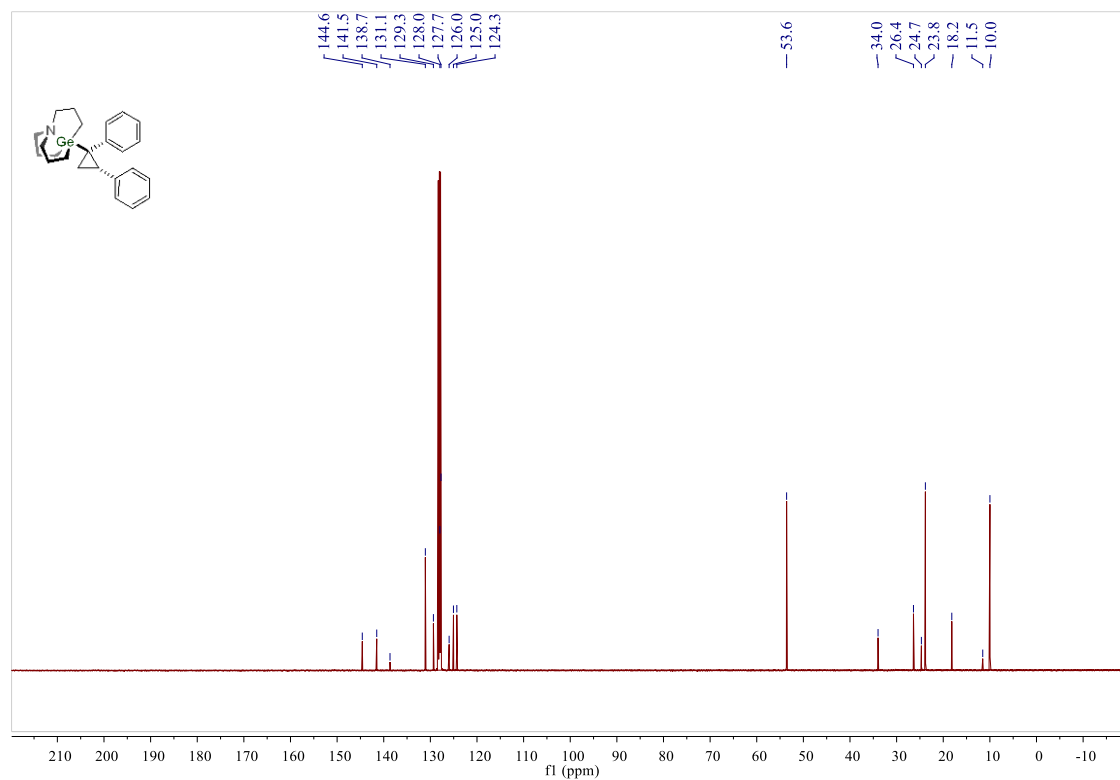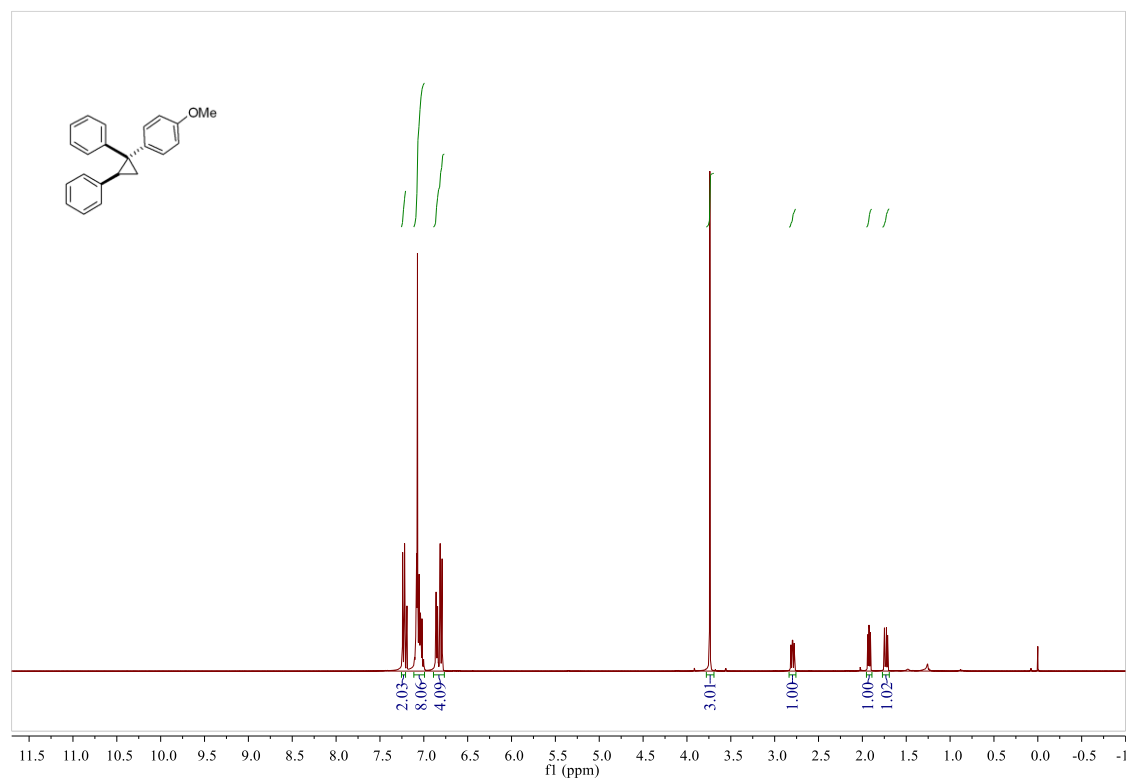



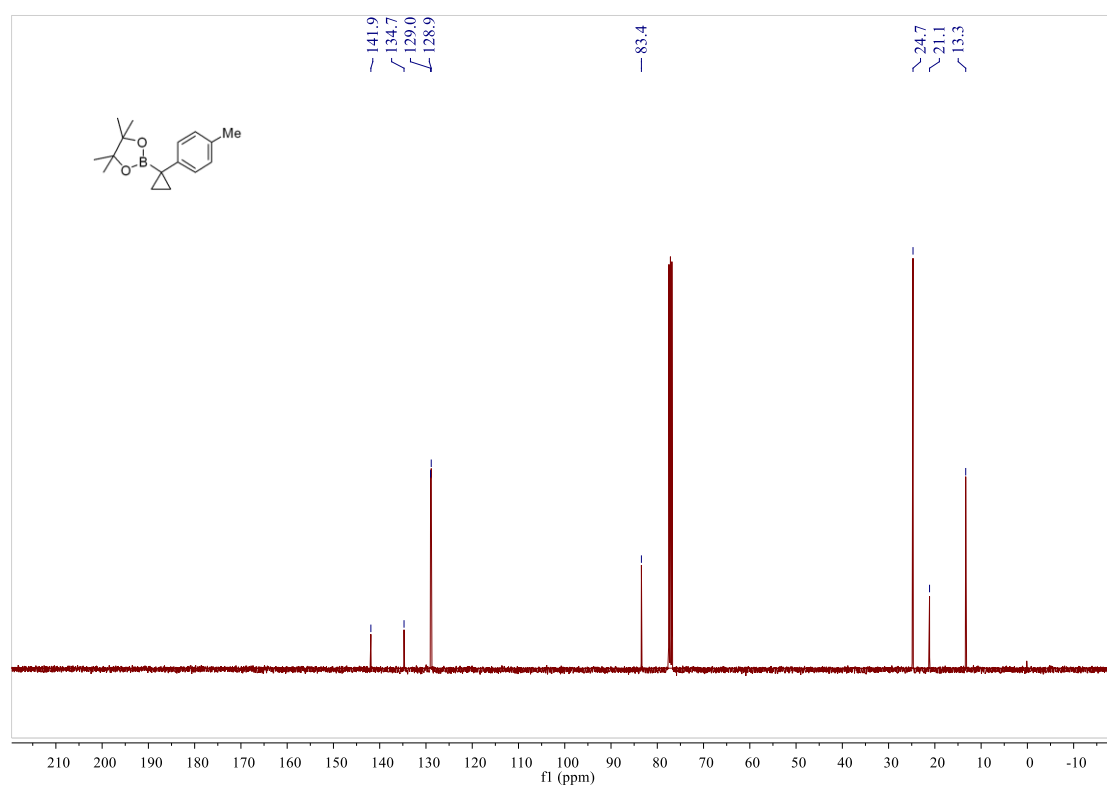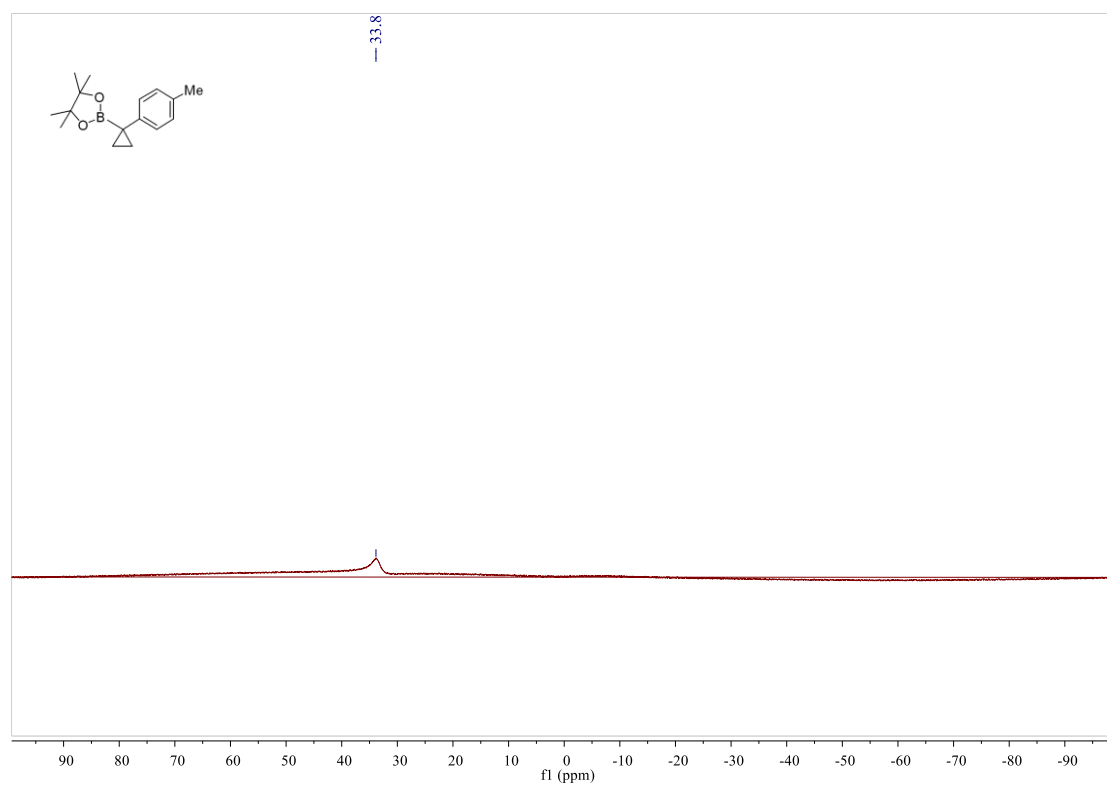

Supplement: d1cc02930d1.pdf [file d1cc02930d1.pdf]
